# Supplementary material for: Clinical outcomes and cost–utility of rotator cuff repair surgery by open and arthroscopic techniques: study protocol for a randomised clinical trial
Source: PubMed Central journal article supplement — BMJ Open. 2020 Dec 28;10(12):e043126. doi: 10.1136/bmjopen-2020-043126 (PMC7772301; doi:10.1136/bmjopen-2020-043126), 2020-12-28
Supplement: bmjopen-2020-043126.draft_revisions.pdf [file bmjopen-2020-043126.draft_revisions.pdf]

# BMJ Open

BMJ Open is committed to open peer review. As part of this commitment we make the peer review history of every article we publish publicly available.

When an article is published we post the peer reviewers' comments and the authors' responses online. We also post the versions of the paper that were used during peer review. These are the versions that the peer review comments apply to.

The versions of the paper that follow are the versions that were submitted during the peer review process. They are not the versions of record or the final published versions. They should not be cited or distributed as the published version of this manuscript.

BMJ Open is an open access journal and the full, final, typeset and author-corrected version of record of the manuscript is available on our site with no access controls, subscription charges or pay-per-view fees (<http://bmjopen.bmj.com>).

If you have any questions on BMJ Open's open peer review process please email [info.bmjopen@bmj.com](mailto:info.bmjopen@bmj.com)

# BMJ Open

## Cost-Utility of Rotator Cuff Repair Surgery by Open and Arthroscopic Techniques: Study Protocol for a Randomized Clinical Trial.

|                               |                                                                                                                                                                                                                                                                                                                                                                                                                                                                                                                                                                                                                                                                                                                                                                                        |
|-------------------------------|----------------------------------------------------------------------------------------------------------------------------------------------------------------------------------------------------------------------------------------------------------------------------------------------------------------------------------------------------------------------------------------------------------------------------------------------------------------------------------------------------------------------------------------------------------------------------------------------------------------------------------------------------------------------------------------------------------------------------------------------------------------------------------------|
| Journal:                      | <i>BMJ Open</i>                                                                                                                                                                                                                                                                                                                                                                                                                                                                                                                                                                                                                                                                                                                                                                        |
| Manuscript ID                 | bmjopen-2020-043126                                                                                                                                                                                                                                                                                                                                                                                                                                                                                                                                                                                                                                                                                                                                                                    |
| Article Type:                 | Protocol                                                                                                                                                                                                                                                                                                                                                                                                                                                                                                                                                                                                                                                                                                                                                                               |
| Date Submitted by the Author: | 28-Jul-2020                                                                                                                                                                                                                                                                                                                                                                                                                                                                                                                                                                                                                                                                                                                                                                            |
| Complete List of Authors:     | Pierami, Rafael; Hospital Israelita Albert Einstein, Sistema Locomotor; Grupo de Ombro e Cotovelo do Hospital Alvorara Moema, Departamento de Ortopedia<br>Lenza, Mario; Hospital Israelita Albert Einstein, Programa Locomotor<br>Antonioli, Eliane; Hospital Israelita Albert Einstein, Orthopaedic<br>Oliveira, Isadora; Hospital Israelita Albert Einstein, Sistema Locomotor<br>Castro, Isabela; Hospital Israelita Albert Einstein, Sistema Locomotor<br>Manente, Felipe; Hospital Israelita Albert Einstein, Sistema Locomotor<br>Fairbanks, Paula; Hospital Israelita Albert Einstein, Sistema Locomotor<br>Carrera, Eduardo; Hospital Israelita Albert Einstein, Departamento de Ortopedia<br>Matsumura, Bruno; Hospital Israelita Albert Einstein, Departamento de Ortopedia |
| Keywords:                     | Adult orthopaedics < ORTHOPAEDIC & TRAUMA SURGERY, Elbow & shoulder < ORTHOPAEDIC & TRAUMA SURGERY, Musculoskeletal disorders < ORTHOPAEDIC & TRAUMA SURGERY, Shoulder < ORTHOPAEDIC & TRAUMA SURGERY, Orthopaedic sports trauma < ORTHOPAEDIC & TRAUMA SURGERY                                                                                                                                                                                                                                                                                                                                                                                                                                                                                                                        |
|                               |                                                                                                                                                                                                                                                                                                                                                                                                                                                                                                                                                                                                                                                                                                                                                                                        |

SCHOLARONE™  
Manuscripts

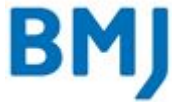

I, the Submitting Author has the right to grant and does grant on behalf of all authors of the Work (as defined in the below author licence), an exclusive licence and/or a non-exclusive licence for contributions from authors who are: i) UK Crown employees; ii) where BMJ has agreed a CC-BY licence shall apply, and/or iii) in accordance with the terms applicable for US Federal Government officers or employees acting as part of their official duties; on a worldwide, perpetual, irrevocable, royalty-free basis to BMJ Publishing Group Ltd ("BMJ") its licensees and where the relevant Journal is co-owned by BMJ to the co-owners of the Journal, to publish the Work in this journal and any other BMJ products and to exploit all rights, as set out in our [licence](#).

The Submitting Author accepts and understands that any supply made under these terms is made by BMJ to the Submitting Author unless you are acting as an employee on behalf of your employer or a postgraduate student of an affiliated institution which is paying any applicable article publishing charge ("APC") for Open Access articles. Where the Submitting Author wishes to make the Work available on an Open Access basis (and intends to pay the relevant APC), the terms of reuse of such Open Access shall be governed by a Creative Commons licence – details of these licences and which [Creative Commons](#) licence will apply to this Work are set out in our licence referred to above.

Other than as permitted in any relevant BMJ Author's Self Archiving Policies, I confirm this Work has not been accepted for publication elsewhere, is not being considered for publication elsewhere and does not duplicate material already published. I confirm all authors consent to publication of this Work and authorise the granting of this licence.

1  
2  
3 1 **1. Title:** Cost-Utility of Rotator Cuff Repair Surgery by Open and  
4  
5 2 Arthroscopic Techniques: Study Protocol for a Randomized Clinical  
6  
7 3 Trial  
8  
9

10 4 **1a.Short title:** Cost-utility of open and arthroscopic rotator cuff  
11  
12 5 repair  
13  
14

15 6 **1b.Authors:** Rafael Pierami<sup>1</sup>, Eliane Antonioli<sup>2</sup>, Isadora Oliveira<sup>2</sup>,  
16  
17 7 Isabela Queirós Castro<sup>2</sup>, Felipe Manente<sup>3</sup>, Paula Fairbanks<sup>3</sup>, Eduardo  
18  
19 8 da Frota Carrera<sup>1</sup>, Bruno Akio Matsumura<sup>1</sup>, Mário Lenza<sup>2</sup>  
20  
21

22 9 1.Centro de Excelência em Cirurgia de Ombro e Cotovelo, Hospital Alvorada Moema, São Paulo/SP, Brazil; 2.  
23  
24 10 Hospital Israelita Albert Einstein, São Paulo/SP, Brazil; 3. Faculdade de Medicina Albert Einstein, São  
25  
26 11 Paulo/SP, Brazil  
27  
28  
29  
30

31 13 **1c.Corresponding Author:** Rafael Pierami (Hospital Israelita Albert  
32  
33 14 Einstein, Programa Locomotor; Avenida Albert Einstein, 627)  
34  
35

36 15 **1d.Authors e-mail:** Eliane Antonioli:  
37  
38 16 [eliane.antonioli@einstein.br](mailto:eliane.antonioli@einstein.br); Isadora Oliveira:  
39  
40 17 [Isadora.odoliveira@einstein.br](mailto:Isadora.odoliveira@einstein.br); Isabela Queirós Castro:  
41  
42 18 [isabela.castro@einstein.br](mailto:isabela.castro@einstein.br); Felipe Manente: [fegmanente@gmail.com](mailto:fegmanente@gmail.com);  
43  
44 19 Paula Fairbanks: [paulafairbanks@uol.com.br](mailto:paulafairbanks@uol.com.br); Eduardo da Frota  
45  
46 20 Carrera: [e.carrera@me.com](mailto:e.carrera@me.com); Bruno Akio Matsumura:  
47  
48 21 [bru.akio@gmail.com](mailto:bru.akio@gmail.com)  
49  
50  
51

52 22 **1e.Trial Sponsor:** Fundação de Amparo à Pesquisa do Estado de São  
53  
54 23 Paulo (FAPESP 2019/02159-3) R. Pio XI, 1500 - Alto da Lapa - CEP  
55  
56

1  
2  
3 24 05468-901 São Paulo/SP - Brasil

4  
5 25 Tel: (+55) 11 3838-4000

6  
7  
8 26

9  
10  
11 27

12  
13  
14 28

15  
16  
17 29 **2. Abstract**

18  
19  
20 30 Introduction: Rotator cuff injuries account for up to 70% of  
21  
22 31 pain in the shoulder girdle. However, there is still no consensus  
23  
24 32 on the best surgical treatment of patients with rotator cuff  
25  
26 33 injuries, regarding the cost-effectiveness and cost-utility  
27  
28 34 analysis between the open and arthroscopic methods of rotator cuff  
29  
30 35 repair. The objective of this trial is to compare the efficacy,  
31  
32 36 cost-effectiveness and cost-utility of open and arthroscopic  
33  
34 37 procedure for rotator cuff repair.

35  
36  
37 38 Methods and Analysis: The trial is a two-group, parallel  
38  
39 39 design, randomized controlled trial. A total of 100 patients with  
40  
41 40 symptomatic rotator cuff lesion will be allocated in either open  
42  
43 41 or arthroscopic technique in a 1:1 ratio, considering smoking (yes  
44  
45 42 or no), lesion size (less than 3 cm or more than 3 cm) and diabetes  
46  
47 43 (present or absent) as stratification factors. All patients will  
48  
49 44 be included in the same rehabilitation program after the  
50  
51 45 intervention. The primary outcome measure will be the Constant-

1  
2  
3 46 Murley score at 48 weeks post-surgery. Secondary outcomes include  
4  
5 47 cost-effectiveness, cost-utility, pain, complications and clinical  
6  
7 48 analysis, using the EuroQol 5-D3L, the simple shoulder test (SST),  
8  
9 49 Visual Analogue Pain Scale (VAS), integrity of the repair evaluated  
10  
11 50 through magnetic resonance imaging, complications and failures of  
12  
13 51 the proposed methods. For the cost-effectiveness analyses, we will  
14  
15 52 use the VAS and the Constant-Murley Score as measures of  
16  
17 53 effectiveness; for the cost-utility analyses, we will use the  
18  
19 54 EuroQol- 5D-3L as a measure of utility in terms of incremental  
20  
21 55 cost per quality-adjusted life-years (QALY).  
22  
23  
24

25  
26 56 Ethics and Dissemination: the study is approved by Research  
27  
28 57 Ethics Committee. The results will be published in a peer-reviewed  
29  
30 58 journal.  
31  
32

33  
34 59 Trial Registration Number: NCT04146987  
35  
36

37 60 Keywords: rotator cuff; surgery; arthroscopy; open repair; cost-  
38  
39 61 effectiveness; QALY  
40  
41

## 42 **Article Summary**

43  
44

- 45 63 • Few studies evaluate the cost-utility of rotator cuff repair  
46  
47 64 surgery techniques
  - 48  
49 65 • This article will detail the protocol for a randomized  
50  
51 66 controlled trial comparing the two techniques of rotator cuff  
52  
53 67 repair.  
54  
55
- 56  
57  
58  
59  
60

## 68 **Strenghts and limitations of this study**

- 69 • This study is a prospective, randomized trial, that is the  
70 best design to address the study question.
- 71 • It will provide surgeons and healthcare providers with  
72 important information about the surgical technique and the  
73 cost-effectiveness and cost-utility of these techniques
- 74 • The lack of blinding of the patient and surgeons is a  
75 limitation to the study design

## 76 **4. Introduction**

### 77 **4a. Background and Rationale**

78 Musculoskeletal injuries are a major cost to the healthcare  
79 system. In 2004, 30% of the North American population had some  
80 kind of musculoskeletal disorder that required medical treatment;  
81 between 2002 and 2004, the estimated cost of treating these changes  
82 was \$510 billion. Shoulder diseases represent the third most common  
83 cause of these changes, behind only spinal and knee disorders [1],  
84 [2].

85 An evaluation of the primary health care system in Cambridge,  
86 United Kingdom, showed that the average frequency of shoulder pain  
87 was 9.5 per 1,000 individuals [3]. Of these, 86% had rotator cuff  
88 tendinopathy. North American data estimate that approximately 4.5

1  
2  
3 89 million patients annually seek medical attention due to shoulder  
4  
5 90 pain; of these, two million have some symptoms related to the  
6  
7 91 rotator cuff. About 250,000 rotator cuff repair surgeries are  
8  
9 92 performed annually in the United States of America (US), and with  
10  
11 93 the continued increase in life expectancy and aging, there is a  
12  
13 94 tendency to increase this number [1], [2].  
14  
15  
16

17 95 The rotator cuff is a group of four muscles and their tendons  
18  
19 96 that act to stabilize the shoulder and allow for its extensive  
20  
21 97 range of motion. Four muscles and their attached tendons make up  
22  
23 98 the rotator cuff: the subscapularis, supraspinatus, infraspinatus,  
24  
25 99 and teres minor. The long portion of the biceps tendon also  
26  
27 100 contributes to cuff function, which is to stabilize the humeral  
28  
29 101 head in the glenoid cavity, preventing superior migration of the  
30  
31 102 humeral head [4].  
32  
33  
34  
35

36 103 The possible injuries range from tendon degeneration  
37  
38 104 (tendinosis/tendinopathy), through partial tear (articular,  
39  
40 105 interstitial or bursal), to complete tear. Diagnosis is made by  
41  
42 106 associating history and physical examination along with imaging  
43  
44 107 methods, and magnetic resonance imaging (MRI) is considered the  
45  
46 108 method of choice [5]-[13].  
47  
48  
49

50 109 Currently, the indication for surgical treatment is based on  
51  
52 110 the persistence of symptoms and/or the degree of muscle weakness  
53  
54 111 and/or size of the tear, after a time of conservative treatment.  
55  
56



1  
2  
3 112 In general, when opting for surgery, imaging can assist in the  
4  
5 113 planning of surgical treatment, since it allows measuring the  
6  
7 114 extent of the tear (partial or total) and discriminating which  
8  
9 115 tendons are involved (supraspinatus, infraspinatus, etc.).  
10  
11  
12

13 116 Treatment of rotator cuff tear depends on the type of injury,  
14  
15 117 the patient's functional capacity, age, and the presence of  
16  
17 118 symptoms. In general, tendon degeneration and partial tears are  
18  
19 119 treated non-surgically, with physiotherapy, injections and  
20  
21 120 analgesic medications. Complete and incomplete tears that did not  
22  
23 121 respond well to conservative treatment, however, should be treated  
24  
25 122 surgically [8], [14]-[16].  
26  
27  
28

29 123 Among the surgical options, the open method is still  
30  
31 124 considered the gold standard, with good or excellent results in  
32  
33 125 over 90% of cases [17]-[19]. Due to arthroscopy and the evolution  
34  
35 126 of arthroscopic instruments and implants in the last two decades,  
36  
37 127 the arthroscopic repair technique has gained space and is widely  
38  
39 128 used in our country. Some studies [17]-[20] did not show  
40  
41 129 superiority of one technique over another in terms of clinical  
42  
43 130 outcomes. On the other hand, since the cost of arthroscopic surgery  
44  
45 131 is supposedly higher, due to the required equipment, it is  
46  
47 132 important to establish which option has the best cost-utility  
48  
49 133 ratio. Other published studies suggested that the open method is  
50  
51  
52  
53  
54  
55  
56  
57  
58  
59  
60

1  
2  
3 134 superior than the arthroscopic method in relation to cost-utility  
4  
5 135 [21]-[23].  
6  
7

#### 8 136 **4b.Objectives** 9

10  
11 137 Despite the high incidence of rotator cuff injury, there is  
12  
13 138 no consensus about the best method of repair, neither which method  
14  
15 139 has the cost-effectiveness and cost-utility ratio. Therefore, the  
16  
17 140 present study aims to compare the open and arthroscopic methods  
18  
19 141 for rotator cuff repair and determine which presents the best cost-  
20  
21 142 effectiveness ratio.  
22  
23  
24

#### 25 143 **5.Trial Design** 26

27  
28 144 The trial will be a prospective randomized controlled  
29  
30 145 clinical trial.  
31  
32

#### 33 146 **6.Methods** 34

35  
36 147 This randomized controlled trial will follow the Consolidated  
37  
38 148 Standards of Reporting Trials (CONSORT) Statement [24]; also the  
39  
40 149 protocol was developed following the SPIRIT guidelines[25]. It  
41  
42 150 will be performed at Hospital Alvorada Moema (Shoulder and Elbow  
43  
44 151 Surgery Center of Excellence), São Paulo, Brazil. The cost analysis  
45  
46 152 will be performed by Hospital Israelita Albert Einstein team, São  
47  
48 153 Paulo, Brazil.  
49  
50  
51

52  
53 154 The study has been approved by the local Research Ethics  
54  
55 155 Committee from both institutions: Hospital Israelita Albert  
56  
57  
58  
59  
60

1  
2  
3 156 Einstein (CAAE 19182619.3.1001.0071) and Hospital Alvorada Moema  
4  
5 157 (CAAE 19182619.3.2002.5533).  
6  
7

8 158 All and any modifications in this study will be promptly  
9  
10 159 reported to all Research Ethics Committee, all institutions, all  
11  
12  
13 160 investigators and all participants.  
14  
15

16 161 The project is registered in the ClinicalTrials.gov database  
17  
18 162 (NCT04146987  
19  
20 163 [https://clinicaltrials.gov/ct2/show/NCT04146987?term=NCT04146987](https://clinicaltrials.gov/ct2/show/NCT04146987?term=NCT04146987&draw=2&rank=1)  
21  
22 164 &draw=2&rank=1).  
23  
24  
25

26 165 The study is sponsored by Fundação de Amparo à Pesquisa do  
27  
28 166 Estado de São Paulo (FAPESP 2019/02159-3) R. Pio XI, 1500 - Alto  
29  
30 167 da Lapa - CEP 05468-901 São Paulo/SP - Brasil  
31  
32 168 Tel: (+55) 11 3838-4000. This institution and the patients enrolled  
33  
34  
35 169 had and will have no role on study design, collection, management,  
36  
37 170 analysis and data interpretation, writing the report and decision  
38  
39 171 to submit the report for publication.  
40  
41  
42

#### 43 172 **6a. Sample size**

44  
45

46 173 The sample size estimate was obtained to detect differences  
47  
48 174 between the open and arthroscopic repair groups in relation to the  
49  
50 175 primary outcome of the study, Constant-Murley Score (CM)  
51  
52 176 instrument after the intervention. Kukkone's et al. 2013 study  
53  
54  
55 177 [26] estimated the clinically important minimal difference in CM  
56  
57  
58  
59  
60

1  
2  
3 178 score in 10.4 points in patients with rotator cuff rupture after  
4  
5 179 3 months of surgical treatment by the arthroscopic method. The  
6  
7 180 estimated sample size of 45 patients per group, total of 90  
8  
9 181 patients, would reach 90% power to detect a 10.4 difference between  
10  
11 182 the groups in the CM instrument post-operative score with a  
12  
13 183 standard deviation of up to 15 points with a significance level of  
14  
15 184 5% using a t-Student test. Predicting a loss of around 10% at 12  
16  
17 185 months of follow-up we aim to recruit 50 patients per group (PASS  
18  
19 186 software [27]).  
20  
21  
22  
23  
24

#### 25 187 **6b. Inclusion criteria**

26  
27  
28 188 All patients eighteen years of age or older, presenting with  
29  
30 189 complete rotator cuff injury or a high-grade partial rotator cuff  
31  
32 190 injury, symptomatic, where conservative therapy failed  
33  
34 191 (maintenance of pain and disability after conservative treatment),  
35  
36 192 or the patient could not support the non-surgical treatment. All  
37  
38 193 patients ought not to have any medical contraindications for  
39  
40 194 surgery, have a good understanding of the Portuguese language,  
41  
42 195 agree to participate in the study and sign the Informed Consent  
43  
44 196 Form.  
45  
46  
47  
48  
49

#### 50 197 **6c. Exclusion criteria**

51  
52 198 Patients with previous shoulder surgery, previous fractures  
53  
54 199 in the affected shoulder, those with passive range of motion  
55  
56  
57  
58  
59  
60

1  
2  
3 200 limitation (joint stiffness with an elevation of 90 degrees or  
4  
5 201 less), radiographic signs of glenohumeral osteoarthritis or  
6  
7 202 neurologic injury will be excluded. Patients will also be excluded  
8  
9  
10 203 if they do not wish to participate or are unable to understand or  
11  
12 204 sign the informed consent form (due to conditions such as cognitive  
13  
14 205 impairment, or mental illness) or if there are any conditions that  
15  
16 206 contraindicate any of the surgical methods.

#### 20 207 **6d. Randomization and allocation**

23 208 After eligibility assessment, all patients will be informed  
24  
25 209 about the nature and purpose of the study and will only be included  
26  
27 210 after agreeing with the study and signing the informed consent  
28  
29 211 form, that will be obtained by the surgeon that evaluated the  
30  
31 212 patient and indicated the surgery. Patients will be consecutively  
32  
33 213 allocated to one of two proposed treatment methods: open rotator  
34  
35 214 cuff repair or arthroscopic rotator cuff repair (FIGURE 1). The  
36  
37 215 software R was used to generate a randomization list, considering  
38  
39 216 100 patients to be included in the study and the same probability  
40  
41 217 of allocation for both methods of surgery (open and arthroscopic  
42  
43 218 repair). The variables will be: smoking (yes or no), the size of  
44  
45 219 the lesion ( $\leq 3$  cm or  $> 3$  cm) and diabetes (present or absent).  
46  
47 220 Randomization will be performed by the REDCap platform (Research  
48  
49 221 Electronic Data Capture - Vanderbilt University) [28][29] after the  
50  
51 222 patient is anesthetized and prepared for the surgery. A person not  
52  
53  
54  
55  
56  
57  
58  
59  
60

1  
2  
3 223 associated with the study will open the software and acquire one  
4  
5 224 of the two techniques possible and tell the surgeon who will  
6  
7 225 perform the surgery.  
8  
9

#### 10 226 **6e. Recruitment**

11  
12  
13 227 All patients that are already treated by the shoulder surgeons  
14  
15 228 at at Hospital Alvorada Moema (Shoulder and Elbow Surgery Center  
16  
17 229 of Excellence), São Paulo, Brazil, will be enrolled in. this trial.  
18  
19  
20

#### 21 230 **6f. Blinding**

22  
23  
24 231 Due to the type of interventions, neither participants nor  
25  
26 232 treatment providers can be blinded to treatment allocation. The  
27  
28 233 outcome assessment of the primary and secondary outcomes  
29  
30 234 (Constant-Murley; EuroQol; VAS and SST), patient-reported  
31  
32 235 outcomes, will not be blind. One of the authors (RP) will assess  
33  
34 236 all other clinical outcomes. All primary and secondary outcomes  
35  
36 237 will be assessed at baseline, 6, 24 and 48 weeks, except for the  
37  
38 238 VAS which will also be assessed at hospital discharge, 1, 2 and 4  
39  
40 239 weeks. The statisticians conducting the analyses will be blinded  
41  
42 240 to the treatment status until the analyses are completed.  
43  
44  
45  
46  
47

#### 48 241 **6g. Patient and Public Involvement**

49  
50  
51 242 No patient involved  
52  
53  
54  
55  
56  
57  
58  
59  
60

## 243 7. Intervention methods

244 Five surgeons with at least four years of surgical technique  
245 experience will participate in this study (EFC, MTCA, RP, BAM,  
246 VR). Also, the residents of shoulder and elbow surgery, as well as  
247 the residents of Orthopedics and Traumatology from Hospital  
248 Alvorada Moema and residents in shoulder and elbow surgery at  
249 Albert Einstein Hospital may participate in surgeries.

250 Open surgery: patients will be positioned in a beach chair  
251 position with the affected limb pending off the table, allowing  
252 manipulation and full range of motion range. After asepsis,  
253 antiseptis, and placement of sterile surgical fields, an  
254 anterolateral incision will be made in the shoulder in question;  
255 the deltoid muscle belly will be gently divided along its fibers  
256 until exposure of the subdeltoid / subacromial bursa, which will  
257 be partially excised for exposure of the subacromial space and  
258 rotator cuff tendons. After mobilization and release of the  
259 ruptured tendons and debridement of the rotator cuff footprint,  
260 the tendon repair to the bone will be performed using 5.5mm metal  
261 anchors, according to the preference and technique chosen by the  
262 surgeon. In all cases, the release of the coracoacromial ligament  
263 and acromioplasty will be performed.

264 Arthroscopic Technique: the patients will be positioned in  
265 lateral decubitus position, with the limb to be operated attached

1  
2  
3 266 to a skin traction device, which through a traction post and 7  
4  
5 267 kilograms (kg), will maintain the shoulder in the following  
6  
7 268 position: abduction of 30 to 60 degrees and flexion of 20 to 30  
8  
9 269 degrees. After asepsis, antisepsis, and placement of impermeable  
10  
11 270 sterile surgical fields, a posterolateral incision will be made in  
12  
13 271 the shoulder for optic introduction, with a 50mmHg pressure pump  
14  
15 272 and a 0.90 flow, and inspection of the glenohumeral joint. If  
16  
17 273 necessary, an anterior accessory portal will be performed for intra  
18  
19 274 articular instrumentation. After joint inspection, the optic will  
20  
21 275 be introduced into the subacromial space with detachment of the  
22  
23 276 subacromial and subdeltoid bursa with the trocar. After  
24  
25 277 visualizing the lesion, an accessory lateral portal will be  
26  
27 278 performed. With the use of shaver blades, partial bursectomy will  
28  
29 279 be performed and any adherence to the tendon stumps will be  
30  
31 280 released, as well as debridement of the rotator cuff footprint.  
32  
33 281 The tendon will then be reinserted to the bone using metallic 5.5mm  
34  
35 282 anchors, according to the preference of each surgeon. The technique  
36  
37 283 used, as well as the suture configuration and type of knot used,  
38  
39 284 will be defined by the surgeon, according to his preference. After  
40  
41 285 tendon repair, the coracoacromial ligament will be released, as  
42  
43 286 well as acromioplasty.  
44  
45  
46  
47  
48  
49  
50  
51  
52  
53

## 54 288 **8. Postoperative rehabilitation**



1  
2  
3 289 All patients will undergo the same postoperative  
4  
5 290 rehabilitation protocol: use of Velpeau sling for 6 weeks; pendulum  
6  
7 291 exercises from the second week; active movement and recovery of  
8  
9 292 the range of motion from the sixth week and strengthening from the  
10  
11  
12 293 twelfth week.  
13  
14

15 294 The patients will be oriented to perform home exercises and,  
16  
17 295 as well, to be assisted by a physiotherapist twice a week from the  
18  
19 296 sixth week of surgery and on. It is expected at the end of treatment  
20  
21  
22 297 the need of about thirty sessions of physical therapy.  
23  
24

25 298

### 28 299 **9.Outcomes assessment**

30  
31 300 Study data will be collected and managed using REDCap  
32  
33 301 (Research Electronic Data Capture) hosted at Hospital Israelita  
34  
35 302 Albert Einstein [28][29]. REDCap is a secure, web-based software  
36  
37 303 platform designed to support data capture for research studies,  
38  
39 304 providing: 1) an intuitive interface for validated data capture;  
40  
41  
42 305 2) audit trails for tracking data manipulation and export  
43  
44 306 procedures; 3) automated export procedures for seamless data  
45  
46 307 downloads to common statistical packages; and 4) procedures for  
47  
48 308 data integration and interoperability with external sources.  
49  
50

51  
52 309 All study participants will be evaluated preoperatively, at  
53  
54 310 the hospital discharge and 1, 2, 6, 24 and 48 weeks after the  
55  
56

1  
2  
3 311 intervention. The Constant-Murley score, Visual Analogue Scale,  
4  
5 312 EuroQol-5D-3L and the Simple Shoulder Test validated to the  
6  
7 313 Portuguese language questionnaires will be filled out by the  
8  
9 314 patient and assessed by evaluators to the assigned intervention.  
10  
11  
12 315

13  
14  
15 316 To prevent loss of follow-up all the patients will be  
16  
17 317 monitored by REDCap software and alerts will be sent to each  
18  
19 318 patient near time points defined by the investigators. One week  
20  
21 319 before every medical consultation and at the twelfth week,  
22  
23 320 regarding the rehabilitation process. If the patient fails to fill  
24  
25 321 any questionnaire or does not attend the medical consultations, he  
26  
27 322 will be contacted by phone and e-mail.  
28  
29  
30

### 31 323 **10.Primary outcome**

32  
33  
34 324 The Brazilian Portuguese Version of the Constant-Murley Score  
35  
36 325 (CM) [30] will be measured preoperatively at 6, 24 and 48 weeks  
37  
38 326 after the intervention. Research assistants (not blinded to the  
39  
40 327 study aim) will ask the patients to fill in the validated CM form  
41  
42 328 for the Portuguese language and measure the range of motion with  
43  
44 329 a goniometer. The CM scale covers different domains of shoulder  
45  
46 330 function (pain, activities of daily living, range of motion and  
47  
48 331 power), punctuating each of them; it ranges from 0 to 100, with  
49  
50 332 higher scores indicating better function.  
51  
52  
53  
54  
55  
56  
57  
58  
59  
60

### 333 **10b. Secondary outcomes**

334 EuroQol-5D-3L (European Quality of Life), a generic score  
335 developed to describe health-related quality of life [24] will  
336 also be assessed preoperatively, at 6, 24 and 48 weeks  
337 postoperatively. This score includes five health domains:  
338 mobility, self-care, usual activities, pain/discomfort, and  
339 anxiety/depression; each domain has 3 levels: no problem; some  
340 problems and extreme problems. In addition, the EuroQol-5D-3L has  
341 a visual analog scale where the participant assigns a value between  
342 zero and one hundred to his or her own health condition [31]. At  
343 the end of its application, EuroQol-5D-3L will provide a unique  
344 numerical value that can be used for longitudinal comparison  
345 between different time periods.

346 Clinical outcomes will also be assessed by the Simple Shoulder  
347 Test (SST), validated for Portuguese [32], preoperatively and at  
348 6, 24 and 48 weeks after the procedure. SST is a simple, quick and  
349 widely used questionnaire for shoulder function measurement; it  
350 consists of 12 dichotomous questions answered by the patient  
351 himself. Each positive answer (yes) is given a score; at the end  
352 of the questionnaire the percentage of positive answers (score) is  
353 made, and the higher the percentage, the better the shoulder  
354 function. Other outcomes measured will be VAS (visual analogue  
355 pain scale) at hospital discharge, 1, 2, 6, 24 and 48 weeks after

1  
2  
3 356 the intervention. This scale allows pain intensity to be measured  
4  
5 357 with maximum interobserver reproducibility; it consists of a 10 cm  
6  
7 358 straight line with the ends determining the limits of pain  
8  
9 359 sensation (no pain; worst pain ever experienced); the distance  
10  
11 360 between zero (no pain) and the patient's demarcation defines the  
12  
13 361 intensity of pain. Complications and failures of the proposed  
14  
15 362 methods will also be assessed.  
16  
17  
18  
19  
20

21 363 Failures will be characterized as the need for additional  
22  
23 364 surgical procedures and/or change of the initially proposed  
24  
25 365 procedure. Patients who, for any reason, demonstrate treatment  
26  
27 366 failure or require additional interventions will be followed up  
28  
29 367 and their results included in the group in which they were  
30  
31 368 initially randomized, according to the intention to treat  
32  
33 369 principle.  
34  
35

36 370  
37  
38  
39 371 After the 48th week, all patients will be submitted to  
40  
41 372 Magnetic Resonance Imaging (MRI) of the operated shoulder to  
42  
43 373 evaluate the integrity and healing of the repair performed.  
44  
45

46 374  
47  
48

### 49 375 **10c. Cost-effectiveness**

50  
51

52 376 Cost-effectiveness and cost-utility analyses will be assessed  
53  
54 377 by the estimate of direct and indirect costs to the private  
55  
56

1  
2  
3 378 healthcare system at 48 weeks. The perspective adopted in the study  
4  
5 379 will be the social costs, the direct and indirect medical costs.  
6  
7  
8 380 The set timeframe will be 48 weeks and a discount rate of 5% will  
9  
10 381 be applied. The costs included in direct medical costs will be:  
11  
12 382 hospitalization, medical fees, medication; the indirect costs:  
13  
14 383 costs of absenteeism from work, which will be estimated by the  
15  
16 384 patient-reported number of days away from work multiplied by the  
17  
18 385 average wage rate of the current year. The costs will be converted  
19  
20  
21 386 from Brazilian Reais to US dollars and brought to the cost schedule  
22  
23 387 of the current year, in order to avoid that the effect of inflation  
24  
25 388 on the medical inputs influences the analysis. For the cost-  
26  
27 389 effectiveness analyses, the VAS and the CM will be used as measures  
28  
29 390 of effectiveness. For the cost-utility analyses, the EuroQOL-5D-  
30  
31 391 3L will be used as a measure of utility. The timetable of outcomes  
32  
33 392 assessment is described on Table 1.  
34  
35  
36  
37  
38 393  
39  
40  
41 394  
42  
43  
44 395  
45  
46  
47 396  
48  
49 397 **Table 1.** Timetable of assessment

|                     |
|---------------------|
| <b>STUDY PERIOD</b> |
|---------------------|

|                                      | Enrolment | Allocation | Post-Allocation |          |          |          |          | Closure  |
|--------------------------------------|-----------|------------|-----------------|----------|----------|----------|----------|----------|
| TIMEPOINT                            | 0         | 0          | Surge<br>ry     | 1w       | 2w       | 6w       | 24<br>w  | 48w      |
| <b>ENROLMENT :</b>                   |           |            |                 |          |          |          |          |          |
| Eligibility Screen                   | <b>X</b>  |            |                 |          |          |          |          |          |
| Informed Consent                     | <b>X</b>  |            |                 |          |          |          |          |          |
| CM; EQ-5D, SST;<br>VAS<br>Allocation |           | <b>X</b>   |                 |          |          |          |          |          |
| <b>INTERVENTIONS</b>                 |           |            |                 |          |          |          |          |          |
| Open Repair                          |           |            | <b>X</b>        |          |          |          |          |          |
| Arthroscopic Repair                  |           |            | <b>X</b>        |          |          |          |          |          |
| <b>ASSESSMENTS :</b>                 |           |            |                 |          |          |          |          |          |
| CM; EQ-5D, SST;<br>VAS               |           |            |                 |          |          | <b>X</b> | <b>X</b> | <b>X</b> |
| MRI                                  | <b>X</b>  |            | <b>X</b>        | <b>X</b> | <b>X</b> | <b>X</b> | <b>X</b> | <b>X</b> |
| Complications                        |           |            | <b>X</b>        | <b>X</b> | <b>X</b> | <b>X</b> | <b>X</b> | <b>X</b> |
| Economics                            |           |            | <b>X</b>        | <b>X</b> | <b>X</b> | <b>X</b> | <b>X</b> | <b>X</b> |

398

## 399 11.Data analysis

400 The descriptive analyzes of variables will be based on the  
 401 absolute frequencies and percentages for categorical variables and  
 402 summary measures as means and standard deviations or medians and  
 403 quartiles, as well as minimum and maximum values for numerical

19

1  
2  
3 404 variables [33]. Clinical scores will be represented by individual  
4  
5 405 profile graphs separately by the surgical technique group.  
6  
7

8 406 The groups will be compared according to the presence of  
9  
10 407 categorical clinical outcomes (failures, complications and healing  
11  
12 408 integrity) by Chi-square or Fisher's exact tests, depending on the  
13  
14 409 distribution observed after data collection.  
15  
16

17  
18 410 For inferential analysis of numerical clinical outcomes,  
19  
20 411 mixed models will be used and, if the normal distribution is not  
21  
22 412 adequate, generalized mixed models will be used [34]. The models  
23  
24 413 will have time effects (preoperative, 6, 24 and 48 weeks after  
25  
26 414 intervention), surgical technique group (open repair or  
27  
28 415 arthroscopic repair) and the interaction effect between time and  
29  
30 416 group. The size of the lesion (smaller than three cm or larger  
31  
32 417 than three cm) will also be included in the models as a control  
33  
34 418 variable, seeking to avoid possible biases.  
35  
36  
37  
38

39 419 The analyzes will be performed with the aid of the SPSS  
40  
41 420 program [35], considering a significance level of 5%.  
42  
43  
44

45 421

## 46 47 422 **12. Safety** 48 49

50 423 There will be no benefit to the participant, beyond what is  
51  
52 424 expected for the correction of the rotator cuff injury, expecting  
53  
54 425 an improvement of pain and function of the affected shoulder. The  
55  
56

1  
2  
3 426 risks of the present study are those inherent in any surgical  
4  
5 427 treatment and anesthetic procedure, such as surgical wound  
6  
7 428 infection, scar formation, pain, shoulder range of motion, rotator  
8  
9 429 cuff tear, neurovascular injury. If any complications occur, all  
10  
11 430 patients will be treated by the same surgical team until the  
12  
13 431 complication is healed.  
14  
15

16  
17 432 Both surgical techniques have the same goal, that is, to  
18  
19 433 repair the ruptured tendon to the bone. The open technique requires  
20  
21 434 a larger incision, as well as greater surgical dissection and  
22  
23 435 manipulation of the deltoid muscle, which may cause greater  
24  
25 436 postoperative pain and weakness of this muscle, in addition to  
26  
27 437 causing a slightly larger scar. However, it provides great  
28  
29 438 visualization and manipulation and mobilization capability of the  
30  
31 439 ruptured tendon, which provides a safer and tension-free repair.  
32  
33  
34  
35

36 440 The arthroscopic technique is performed with some point-  
37  
38 441 shaped cuts in the shoulder, usually three or four; due to smaller  
39  
40 442 incisions, it requires less muscle manipulation, which  
41  
42 443 theoretically would cause less postoperative pain and less muscle  
43  
44 444 weakness of the deltoid muscle, it also has minor scars. However,  
45  
46 445 this technique requires more surgeon's experience and the  
47  
48 446 mobilization of the ruptured tendon(s) is limited. Using a large  
49  
50 447 amount of saline may cause edema in the operated shoulder, which  
51  
52 448 is usually reversed after the first 12 hours of surgery.  
53  
54  
55  
56



1  
2  
3 449 Finally, there is a minimal risk of loss of data  
4  
5 450 confidentiality, but the responsible researcher undertakes to do  
6  
7  
8 451 everything possible to maintain data confidentiality. One of the  
9  
10 452 researchers will have access to all data during the entire trial  
11  
12 453 period. Any adverse event will be reported to the researchers  
13  
14 454 involved and communicated to the main investigator according to  
15  
16 455 the Institutional Review Boards description.  
17  
18

### 19 456 **13.Discussion**

20  
21  
22 457 There is no consensus about the best cost-effectiveness of  
23  
24 458 surgical treatment of patients with degenerative rotator cuff  
25  
26  
27 459 injuries. Several studies [21], [22], [36], [37] suggest that the  
28  
29 460 open repair method is more cost-effective than the arthroscopic  
30  
31 461 method, resulting in the same clinical outcome with lower cost.  
32  
33  
34 462 Adla, Deepthi N. et. al [21] in a prospective nonrandomized study,  
35  
36 463 showed that both techniques lead to the same clinical outcomes.  
37  
38 464 The costs of arthroscopic surgery were higher than the open  
39  
40 465 surgery, mainly due to the costs of the suture anchors, which was  
41  
42  
43 466 used only in the arthroscopic group, is important to notice that  
44  
45 467 in most of the open surgeries, the repair was performed through  
46  
47 468 transosseous sutures. Köse, Kamil Çağrı et. al [22], in a  
48  
49 469 retrospective study, also demonstrated similar clinical outcomes,  
50  
51  
52 470 although the costs of arthroscopic procedure being much higher.  
53  
54 471 Importantly, the open repair technique was performed using  
55  
56

1  
2  
3 472 transosseous sutures and the arthroscopic method using suture  
4  
5 473 anchors and also, the open repair group required longer length  
6  
7 474 hospital stay. Hui, Yik Jing et. al [36] in a retrospective cohort  
8  
9 475 study, described a significantly higher cost for the arthroscopic  
10  
11 476 procedure, compared to the open repair, evaluating only the in-  
12  
13 477 hospital costs, but with the same clinical outcomes. However, it  
14  
15 478 is important to emphasize that the open repair was performed using  
16  
17 479 transosseous sutures, without suture anchors and that the  
18  
19 480 arthroscopic group needed a longer surgery time. Churchill, R.S.  
20  
21 481 et. al [37] using the New York Ambulatory Database System, with a  
22  
23 482 total of 5,224 cuff repair surgeries, of which 1,334 open repair  
24  
25 483 and 3,890 arthroscopic repair, showed that the mini-open rotator  
26  
27 484 cuff repair costs significantly less than the arthroscopic repair  
28  
29 485 and requires significantly less surgical time. However, no  
30  
31 486 clinical outcomes have been analyzed in this study, making it  
32  
33 487 impossible to determine the cost-effectiveness ratio. An elegant  
34  
35 488 study Carr, A.J. et. al [38] carried out as a prospective  
36  
37 489 multicenter randomized clinical trial, concluded that there is no  
38  
39 490 difference in the effectiveness and cost-effectiveness between the  
40  
41 491 open repair surgery and arthroscopic surgery after 24 months of  
42  
43 492 follow-up, even with the higher initial costs in the arthroscopy  
44  
45 493 surgery. An economic evaluation of the data from this study was  
46  
47 494 carried out, showing that the Incremental Cost Effectiveness  
48  
49  
50  
51  
52  
53  
54  
55  
56  
57  
58  
59  
60

1  
2  
3 495 (ICER) was uncertain and the arthroscopic repair surgery was  
4  
5 496 slightly more costly and less effective than open repair surgery.  
6  
7

8 497 Thus, despite the high incidence of rotator cuff injury, there  
9  
10 498 is insufficient evidence to determine the best method for treating  
11  
12 499 these injuries. So, the present study proposes to answer the  
13  
14 500 clinical question of which method, open or arthroscopic, presents  
15  
16 501 the best cost-effectiveness in the surgical treatment of rotator  
17  
18 502 cuff injury. Providing conclusive, good quality evidence for and  
19  
20 503 contributing to the evidence base of methods used to treat rotator  
21  
22 504 cuff injuries.  
23  
24  
25  
26

#### 27 505 **14.Trial status**

28  
29  
30 506 Protocol Trial version: 3 Date: 07/24/2020  
31  
32

33 507 Recruitment Estimated Start Date: August/2020  
34  
35

36 508 Recruitment Estimated End Date: December/2021  
37  
38

39 509 Not yet recruiting.  
40  
41

#### 42 510 **15.Additional files**

43  
44  
45 511 **Table 1.** Timetable of assessment  
46

47 512 **Figure 1.** Flowchart of participants  
48  
49

50 513 Informed Consent  
51  
52  
53  
54  
55  
56  
57  
58  
59  
60

1  
2  
3 514 **16. Abbreviations**  
4  
5

6 515 CONSORT: Consolidated standards of reporting trials; VSA: Visual  
7  
8 516 analogue scale; MRI: magnetic resonance imaging; QALY: quality-  
9  
10 517 adjusted life years; CM: Constant-Murley Score; SST: Simple  
11  
12 518 Shoulder Test  
13  
14  
15

16  
17 519 **17. Declarations**  
18  
19

20 520 **17.1 Ethics Approval and Consent to Participate**  
21  
22

23 521 The study has been approved by the local Research Ethics Committee  
24  
25 522 (CAAE 19182619.3.1001.0071). Digital, informed consent to  
26  
27 523 participate will be obtained from all participants through REDCAP.  
28  
29  
30

31 524 **17.2 Consent for Publication**  
32  
33

34  
35 525 Not Applicable  
36  
37

38 526 **17.3 Availability of Data and Materials**  
39  
40

41  
42 527 The datasets used and/or analysed during the current study will be  
43  
44 528 available from the corresponding author upon request.  
45  
46

47 529 **17.4 Competing interests**  
48  
49

50  
51 530 The authors declare that they have no competing interests.  
52  
53  
54  
55  
56

1  
2  
3 531 17.5 **Fundings**  
4  
5

6 532 This study is supported by Fundação de Amparo à Pesquisa do Estado  
7  
8 533 de São Paulo (FAPESP 2019/02159-3).  
9

10  
11  
12 534 **17.6 Author contributions**  
13

14 535 ML is the Chief Investigator; he conceived the study, led the  
15  
16 536 proposal and protocol  
17  
18  
19 537 development.  
20

21  
22 538 RP is the lead trial methodologist and helped in the study  
23  
24 539 conceiving and development  
25

26  
27  
28 540 EA contributed to study design and to development of the proposal.  
29

30  
31 541 IO contributes to study design related to QALY  
32

33  
34 542 IQC is responsible for cost-analysis  
35

36  
37 543 FM helped in the English translation and registration/publication  
38  
39 544 of the trial  
40

41  
42 545 PF helped in the English translation and registration/publication  
43  
44 546 of the trial  
45

46  
47 547 EFC helped in the study conceiving and development  
48

49  
50 548 BAM helped in the study conceiving and development  
51

52  
53 549 All authors read and approved the final manuscript.  
54  
55  
56  
57  
58  
59  
60

1  
2  
3 550 **17.7 Acknowledgements**  
4  
5

6 551 Not applicable  
7  
8

9 552 **18. Dissemination policy**  
10  
11

12 553 All the authors are committed and agree to publish the full results  
13  
14 554 of the research, despite the final results.  
15  
16

17 555 **19. Data Monitoring Committee (DMC)**  
18  
19

20 556 Since this trial have a short durations and both surgical  
21  
22 557 techniques have known minimal risks, there is no need for such  
23  
24 558 committee.  
25  
26  
27

28 559 **19. References**  
29  
30

31 560 [1] R. C. M. Iii et al., "The Societal and Economic Value of  
32  
33 561 Rotator Cuff Repair," pp. 1993-2000, 2013.  
34

35 562 [2] I. O. Kuye, N. B. Jain, L. Warner, J. H. Herndon, and J. J.  
36  
37 563 P. Warner, "Economic evaluations in shoulder pathologies: A  
38  
39 564 systematic review of the literature," *J. Shoulder Elb. Surg.*,  
40  
41 565 2012.  
42  
43

44 566 [3] A. J. K. Ostör, C. A. Richards, A. T. Prevost, C. A. Speed,  
45  
46 567 and B. L. Hazleman, "Diagnosis and relation to general health  
47  
48 568 of shoulder disorders presenting to primary care.,"  
49  
50 569 *Rheumatology (Oxford)*., 2005.  
51  
52

53 570 [4] L. Favard, G. Bacle, and J. Berhouet, "Rotator cuff repair.,"  
54  
55  
56  
57  
58  
59  
60

- 1  
2  
3 571 *Joint. Bone. Spine*, 2007.
- 4  
5 572 [5] C. Tempelaere *et al.*, "Dynamic Three-Dimensional Shoulder Mri  
6  
7 during Active Motion for Investigation of Rotator Cuff  
8 573 Diseases," *PLoS One*, vol. 11, no. 7, p. e0158563, 2016.
- 9  
10 574  
11  
12 575 [6] Y. Sela *et al.*, "Rotator cuff tears: correlation between  
13  
14 geometric tear patterns on MRI and arthroscopy and pre- and  
15 576  
16 postoperative clinical findings," *Acta Radiol*, vol. 56, no.  
17 577  
18 2, pp. 182-189, 2015.
- 19 578  
20  
21 579 [7] S. A. Teefey, D. A. Rubin, W. D. Middleton, C. F. Hildebolt,  
22  
23 R. A. Leibold, and K. Yamaguchi, "Detection and Quantification  
24 580  
25 of Rotator Cuff Tears: Comparison of Ultrasonographic,  
26 581  
27 Magnetic Resonance Imaging, and Arthroscopic Findings in  
28 582  
29 Seventy-One Consecutive Cases," *J. Bone Jt. Surg. - Ser. A*,  
30 583  
31 2004.
- 32 584  
33  
34 585 [8] A. O. G. Jason E. Hsu Steven B. Lippitt, Frederick A. Matsen  
35  
36 III, "Rockwood and Matsen's The Shoulder, 5th Edition: The  
37 586  
38 Rotator Cuff," in *Rockwood and Matsen's The Shoulder, 5th*  
39 587  
40 *Edition*, 5th ed., Elsevier, 2016, pp. 651-719.
- 41 588  
42  
43 589 [9] S. Yamakawa, H. Hashizume, N. Ichikawa, E. Itadera, and H.  
44  
45 Inoue, "Comparative studies of MRI and operative findings in  
46 590  
47 rotator cuff tear," *Acta Med. Okayama*, 2001.
- 48 591  
49  
50 592 [10] J. S. Roy *et al.*, "Diagnostic accuracy of ultrasonography,  
51  
52 MRI and MR arthrography in the characterisation of rotator  
53 593  
54 cuff disorders: A systematic review and meta-analysis,"  
55 594

1  
2  
3 595 *British Journal of Sports Medicine*. 2015.

4  
5 596 [11] M. Lenza, R. Buchbinder, Y. Takwoingi, R. V. Johnston, N. C.  
6  
7 597 A. Hanchard, and F. Faloppa, "Magnetic resonance imaging,  
8  
9 598 magnetic resonance arthrography and ultrasonography for  
10  
11 599 assessing rotator cuff tears in people with shoulder pain for  
12  
13 600 whom surgery is being considered," *Cochrane Database of*  
14  
15 601 *Systematic Reviews*. 2013.

16  
17  
18 602 [12] H. Handoll, N. Hanchard, M. Lenza, and R. Buchbinder, "Rotator  
19  
20 603 cuff tears and shoulder impingement: a tale of two diagnostic  
21  
22 604 test accuracy reviews," *Cochrane Database Syst. Rev.*, vol. 10,  
23  
24 605 no. October, p. ED000068, 2013.

25  
26  
27 606 [13] N. C. A. Hanchard, M. Lenza, H. H. G. Handoll, and Y.  
28  
29 607 Takwoingi, "Physical tests for shoulder impingements and local  
30  
31 608 lesions of bursa, tendon or labrum that may accompany  
32  
33 609 impingement," *Cochrane Database of Systematic Reviews*. 2013.

34  
35 610 [14] J. C. Seida *et al.*, "Systematic review: Nonoperative and  
36  
37 611 operative treatments for rotator cuff tears," *Annals of*  
38  
39 612 *Internal Medicine*. 2010.

40  
41  
42 613 [15] R. Ainsworth and J. S. Lewis, "Exercise therapy for the  
43  
44 614 conservative management of full thickness tears of the rotator  
45  
46 615 cuff: A systematic review," *British Journal of Sports*  
47  
48 616 *Medicine*. 2007.

49  
50  
51 617 [16] W. Eljabu, H. M. Klinger, and M. von Knoch, "The natural  
52  
53 618 history of rotator cuff tears: a systematic review," *Arch.*



- 1  
2  
3 619 *Orthop. Trauma Surg.*, 2015.
- 4  
5 620 [17] P. Van Der Zwaal, B. J. W. Thomassen, M. J. Nieuwenhuijse, R.  
6  
7 621 Lindenburg, J. W. A. Swen, and E. R. A. Van Arkel, "Clinical  
8  
9 622 outcome in all-arthroscopic versus mini-open rotator cuff  
10  
11 623 repair in small to medium-sized tears: A randomized controlled  
12  
13 624 trial in 100 patients with 1-year follow-up," *Arthrosc. - J.*  
14  
15 625 *Arthrosc. Relat. Surg.*, vol. 29, no. 2, pp. 266-273, 2013.
- 16  
17 626 [18] K. Morse, A. D. Davis, R. Afra, E. Krall Kaye, A. Schepesis,  
18  
19 627 and I. Voloshin, "Arthroscopic versus mini-open rotator cuff  
20  
21 628 repair: A comprehensive review and meta-analysis," *Am. J.*  
22  
23 629 *Sports Med.*, 2008.
- 24  
25  
26  
27  
28 630 [19] X. Ji, C. Bi, F. Wang, and Q. Wang, "Arthroscopic versus mini-  
29  
30 631 open rotator cuff repair: An up-to-date meta-analysis of  
31  
32 632 randomized controlled trials," *Arthrosc. - J. Arthrosc. Relat.*  
33  
34 633 *Surg.*, vol. 31, no. 1, pp. 118-124, 2015.
- 35  
36  
37 634 [20] R. Huang, S. Wang, Y. Wang, X. Qin, and Y. Sun, "Systematic  
38  
39 635 Review of All-Arthroscopic Versus Mini-Open Repair of Rotator  
40  
41 636 Cuff Tears: A Meta-Analysis," *Scientific Reports*. 2016.
- 42  
43  
44 637 [21] D. N. Adla, M. Rowsell, and R. Pandey, "Cost-effectiveness of  
45  
46 638 open versus arthroscopic rotator cuff repair," *J. Shoulder*  
47  
48 639 *Elb. Surg.*, 2010.
- 49  
50  
51 640 [22] K. Ç. Köse *et al.*, "Mini-open versus all-arthroscopic rotator  
52  
53 641 cuff repair: Comparison of the operative costs and the  
54  
55 642 clinical outcomes," *Adv. Ther.*, 2008.

- 1  
2  
3 643 [23] M. A. Vitale, M. G. Vitale, J. G. Zivin, J. P. Braman, L. U.  
4  
5 644 Bigliani, and E. L. Flatow, "Rotator cuff repair: An analysis  
6  
7 645 of utility scores and cost-effectiveness," *J. Shoulder Elb.*  
8  
9 646 *Surg.*, 2007.
- 11  
12 647 [24] G. D. Sanders et al., "Recommendations for conduct,  
13  
14 648 methodological practices, and reporting of cost-effectiveness  
15  
16 649 analyses: Second panel on cost-effectiveness in health and  
17  
18 650 medicine," *JAMA - Journal of the American Medical Association*.  
19  
20 651 2016.
- 22  
23 652 [25] A. W. Chan et al., "SPIRIT 2013 statement: Defining standard  
24  
25 653 protocol items for clinical trials," *Annals of Internal*  
26  
27 654 *Medicine*. 2013.
- 29  
30 655 [26] J. Kukkonen, T. Kauko, T. Vahlberg, A. Joukainen, and V.  
31  
32 656 Äärimaa, "Investigating minimal clinically important  
33  
34 657 difference for Constant score in patients undergoing rotator  
35  
36 658 cuff surgery," *J. Shoulder Elb. Surg.*, 2013.
- 38  
39 659 [27] L. NCSS, "PASS 14 Power Analysis and Sample Size Software."  
40  
41 660 Kaysville, Utah, USA, 2015.
- 43  
44 661 [28] P. A. Harris, R. Taylor, R. Thielke, J. Payne, N. Gonzalez,  
45  
46 662 and J. G. Conde, "Research electronic data capture (REDCap)-  
47  
48 663 A metadata-driven methodology and workflow process for  
49  
50 664 providing translational research informatics support," *J.*  
51  
52 665 *Biomed. Inform.*, 2009.
- 54  
55 666 [29] P. A. Harris et al., "The REDCap consortium: Building an  
56  
57 31

- 1  
2  
3 667 international community of software platform partners,"  
4  
5 668 *Journal of Biomedical Informatics*. 2019.  
6  
7  
8 669 [30] R. P. G. Barreto, M. L. L. Barbosa, M. A. A. Balbinotti, F.  
9  
10 670 C. Mothes, L. H. T. da Rosa, and M. F. Silva, "Versão  
11  
12 671 brasileira do Constant-Murley Score (CMS-BR): validade  
13  
14 672 convergente e de constructo, consistência interna e  
15  
16 673 unidimensionalidade," *Rev. Bras. Ortop.*, vol. 51, no. 5, pp.  
17  
18 674 515-520, 2016.  
19  
20  
21 675 [31] F. Noronha, "Associação Portuguesa de Economia da Saúde Lara  
22  
23 676 de Noronha e Ferreira," p. 46, 2002.  
24  
25  
26 677 [32] J. O. B. Neto *et al.*, "Validation of the Simple Shoulder Test  
27  
28 678 in a Portuguese-Brazilian Population. Is the Latent Variable  
29  
30 679 Structure and Validation of the Simple Shoulder Test Stable  
31  
32 680 across Cultures?," *PLoS One*, vol. 8, no. 5, pp. 1-8, 2013.  
33  
34  
35 681 [33] J. Ludbrook, "PRACTICAL STATISTICS FOR MEDICAL RESEARCH,"  
36  
37 682 *Australian and New Zealand Journal of Surgery*. 1991.  
38  
39  
40 683 [34] J. J. Faraway, *Extending the linear model with R: generalized*  
41  
42 684 *linear, mixed effects and nonparametric regression models*.  
43  
44 685 2006.  
45  
46 686 [35] IBM Corp., "IBM SPSS Statistics for Windows, Version 24.0,"  
47  
48 687 2016. 2016.  
49  
50  
51 688 [36] Y. J. Hui, A. Q. A. Teo, S. Sharma, B. H. M. Tan, and V. Prem  
52  
53 689 Kumar, "Immediate costs of mini-open versus arthroscopic  
54  
55 690 rotator cuff repair in an Asian population," *J. Orthop. Surg.*,

1  
2  
3 691 vol. 25, no. 1, pp. 1-6, 2017.

4  
5 692 [37] R. S. Churchill and J. K. Ghorai, "Total cost and operating  
6  
7 693 room time comparison of rotator cuff repair techniques at low,  
8  
9 694 intermediate, and high volume centers: Mini-open versus all-  
10  
11 695 arthroscopic," *J. Shoulder Elb. Surg.*, 2010.

12  
13  
14 696 [38] A. J. Carr et al., "Clinical effectiveness and cost-  
15  
16 697 effectiveness of open and arthroscopic rotator cuff repair  
17  
18 698 [the UK rotator cuff surgery (UKUFF) randomised trial],"  
19  
20 699 *Health Technol. Assess. (Rockv)*., 2015.

## 21 22 23 700 **TERMO DE CONSENTIMENTO LIVRE E ESCLARECIDO**

24  
25  
26 701

27  
28  
29 702 ***Título do projeto:*** *Custo-Efetividade da Cirurgia de Reparo do Manguito Rotador Pelas Técnicas*  
30  
31 703 *Aberta e Artroscópica. Ensaio Clínico Randomizado.*

32  
33  
34 704 ***Pesquisadores responsáveis:*** *Mario Lenza e Rafael Pierami*

35  
36 705

37 706 O(a) Sr(a) está sendo convidado para participar, como voluntário, de uma pesquisa científica. O Termo de  
38 707 Consentimento Livre e Esclarecido tem por meta esclarecer esta pesquisa, explicando resumidamente seus  
39 708 objetivos, procedimentos, riscos e benefícios. Após ser esclarecido sobre as informações a seguir, e aceitar fazer  
40 709 parte do estudo, rubrique todas as páginas e assine ao final deste documento. Uma via será enviada para o(a) Sr(a)  
41 710 por e-mail.

42  
43 711

44  
45 712 ***Objetivo do estudo:***

46 713 O objetivo deste estudo é avaliar o custo-efetividade (relação da melhora clínica com os custos dos  
47 714 procedimentos) de dois tipos de cirurgias para o reparo do manguito rotador: cirurgia aberta e cirurgia artroscópica.

48  
49 715

50  
51 716 ***Descrição do estudo:***

52 717 A ruptura do manguito rotador, ou seja, o rompimento dos tendões do ombro é a principal causa de dor no  
53 718 ombro na população adulta, causando, além da dor, diminuição da força no ombro acometido e perda de qualidade  
54 719 de vida, devido a dor constante e piora na qualidade do sono causado pela dor. Existem duas técnicas cirúrgicas para

720 correção desta doença: a técnica cirúrgica aberta, realizada por uma incisão (corte) no ombro e visualização direta  
721 do tendão rompido; e a técnica cirúrgica artroscópica, realizada através de pequenos cortes no ombro, por onde são  
722 introduzidos uma câmara de vídeo, para visualização do tendão rompido e instrumentais para realização da cirurgia.  
723 Ainda não há uma definição se há diferença entre os resultados obtidos e as técnicas cirúrgicas utilizadas. O(a) Sr(a)  
724 está sendo convidado para participar deste estudo pois há indicação de cirurgia para o reparo do manguito rotador.

725

726

727

**Procedimentos a serem realizados:**

728

729

730

731

732

733

734

735

736

737

738

739

740

741

742

743

744

O estudo terá dois grupos de pacientes: grupo que fará a reconstrução do manguito via técnica cirúrgica aberta e o grupo que fará a reconstrução via técnica cirúrgica artroscópica. A seleção dos voluntários será feita de forma randomizada, isto é, não saberemos em que tipo de cirurgia cada indivíduo será incluído. A duração total da pesquisa será de um (01) ano e a participação do Sr(a) será em responder questionários sobre a sua saúde antes da cirurgia, comparecer às consultas médicas, antes da cirurgia e após 6, 24 e 48 semanas da cirurgia e realizar os exames de Ressonância magnética antes da cirurgia e após 48 semanas da cirurgia. Caso o(a) Sr(a) concorde em fazer parte deste estudo, os dados preenchidos e coletados serão utilizados para fins de pesquisa. Importante informar que os pacientes de ambos os tipos de cirurgia receberão os mesmos cuidados e os mesmos seguimentos e que não serão necessários exames de imagem ou laboratoriais adicionais àqueles rotineiramente utilizados para pacientes com lesão do manguito rotador. Como tratamento habitual após a cirurgia de lesão do manguito, o(a) Sr(a) será orientado a realizar um programa de reabilitação que inclui o uso de tipóia do tipo Velpeau por seis (06) semanas e um programa de exercícios pendulares orientados. Após, a tipóia será retirada e o(a) Sr(a) será orientado a realizar exercícios domésticos para ganho de movimento, além de duas sessões semanais de fisioterapia para analgesia e recuperação da amplitude de movimento do ombro. A partir da décima segunda semana (12ª) iniciarão os exercícios de fortalecimento muscular sob orientação de fisioterapeuta. No término do estudo será verificado se houve melhora na função do ombro, na qualidade de vida e na cicatrização do tendão reparado por meio de questionários de simples preenchimento e exame de ressonância magnética.

745

746

747

**Possíveis riscos e desconfortos:**

748

749

750

751

752

753

754

Os riscos do presente estudo são aqueles inerentes a qualquer tratamento cirúrgico e procedimento anestésico, como infecção da ferida operatória, formação de cicatriz, dor, limitação do arco de movimento do ombro, rerruptura do manguito rotador, lesão neurovascular. A técnica cirúrgica aberta pode provocar maior dor pós-operatória e fraqueza muscular, além de causar uma cicatriz pouco maior. A técnica cirúrgica artroscópica pode causar menos dor pós-operatória e menos fraqueza muscular; além disso, apresenta cicatrizes menores, mas pode causar edema no ombro operado, o que geralmente é revertido após as primeiras 12 horas da cirurgia.

755

**Benefícios para o participante:**

756

757

758

759

O(a) Sr(a) não terá benefício além do esperado para a operação de correção da lesão, esperando-se melhora da dor e função do ombro operado, independente do tipo de técnica cirurgia utilizada. A sua participação ajudará a entender qual das técnicas cirúrgicas apresenta o melhor custo-efetividade para o tratamento de lesão do manguito rotador e permitirá apresentar à comunidade médica informações sobre a melhor indicação cirúrgica de tratamento.

760

761

**Direitos do participante:**

1  
2  
3 762 Sua participação é voluntária e o(a) Sr(a) pode retirar seu consentimento ou ainda descontinuar sua  
4 763 participação em qualquer momento, se o assim o preferir, sem penalização e/ou prejuízo de qualquer natureza. Não  
5 764 haverá nenhum custo ao Sr(a) proveniente deste estudo, assim como não haverá qualquer tipo de remuneração  
6 765 pela sua participação.

7  
8 766

9  
10 767

11 768 Estou ciente que:

12  
13 769 1. As informações obtidas serão analisadas em conjunto com as de outros voluntários, não sendo divulgada  
14 770 a identificação de nenhum participante.

15  
16 771

17 772 2. As informações produzidas neste estudo serão mantidas em lugar seguro, codificadas e a identificação  
18 773 só poderá ser realizada pela equipe do projeto.

19  
20 774

21  
22 775 4. Em qualquer etapa do estudo, você terá acesso aos profissionais responsáveis pela pesquisa para  
23 776 esclarecimento de eventuais dúvidas. O coordenador do projeto é o Dr. Mário Lenza e o principal responsável pelo  
24 777 estudo é o Dr. Rafael Pierami. Os pesquisadores podem ser encontrados nos seguintes endereços: Dr. Mario Lenza  
25 778 –Av. Albert Einstein, 627 – bloco A1 – 3º andar – Programa Locomotor, Morumbi, São Paulo – CEP 05652-900: Tel:  
26 779 (11) 2151.1444; e-mail: [mario.lenza@einstein.br](mailto:mario.lenza@einstein.br); e Dr. Rafael Pierami –Avenida Ministro Gabriel Rezende de Passos,  
27 780 550, 2º andar, Hospital Alvorada Moema – Centro de Excelência em Cirurgia de Ombro e Cotovelo, Moema, São  
28 781 Paulo – CEP 04521-022 – Tel: (11) 2186-9810 ou (11) 2186-9809; e-mail: [rafael\\_pierami@hotmail.com](mailto:rafael_pierami@hotmail.com).

29  
30 782

31 783 Se você tiver qualquer dúvida ética em relação à pesquisa, entre em contato com:

32  
33 784 **Comitê de Ética em Pesquisa do Hospital Israelita Albert Einstein** - Av. Albert Einstein 627/701, São  
34 785 Paulo/SP, fone 2151-3729, e-mail: [cep@einstein.br](mailto:cep@einstein.br). Reclamações, elogios e sugestões deverão ser encaminhados  
35 786 ao Sistema de Atendimento ao Cliente (SAC) por meio do telefone (11) 2151-0222 ou formulário identificado como  
36 787 fale conosco disponível na página da pesquisa clínica ou pessoalmente.

37  
38 788

39 789 **Comitê de Ética em Pesquisa em Seres Humanos do Hospital Pró-Cardíaco (CEP/HPC)** - Tel: (21) 3289-3802  
40 790 - Localizado na Rua Voluntários da Pátria, 435/8º andar – Botafogo, Rio de Janeiro/RJ, CEP: 22270-005. Horário de  
41 791 atendimento: de segunda à sexta-feira, das 09:00h às 16:00h.

42  
43 792

44  
45 793 Confirmando que li o conteúdo deste Termo de Consentimento Livre e Esclarecido e aceitei participar  
46 794 voluntariamente deste estudo. Ficaram claros para mim quais são os propósitos do estudo, os procedimentos a  
47 795 serem realizados, seus eventuais desconfortos e riscos, as garantias de confidencialidade e de esclarecimentos  
48 796 permanentes. Ficou claro também que minha participação é isenta de despesas e que tenho garantia do acesso a  
49 797 tratamento hospitalar quando necessário. Concordo voluntariamente em participar deste estudo, sabendo que  
50 798 poderei retirar o meu consentimento a qualquer momento, antes ou durante o mesmo, sem penalidades ou  
51 799 prejuízos ou perda de qualquer benefício que eu possa ter adquirido, ou no meu atendimento neste Serviço.

52  
53 800

54  
55 801

1  
2  
3  
4  
5  
6  
7  
8  
9  
10  
11  
12  
13  
14  
15  
16  
17  
18  
19  
20  
21  
22  
23  
24  
25  
26  
27  
28  
29  
30  
31  
32  
33  
34  
35  
36  
37  
38  
39  
40  
41  
42  
43  
44  
45  
46  
47  
48  
49  
50  
51  
52  
53  
54  
55  
56  
57  
58  
59  
60

802

---

803

804

**Nome Completo do participante da pesquisa**

805

806

807

\_\_\_\_\_ Data: \_\_/\_\_/\_\_

808

**Assinatura do participante da pesquisa**

809

810

811

812

813

---

814

**Nome completo e legível do pesquisador responsável**

815

816

817

\_\_\_\_\_ Data: \_\_/\_\_/\_\_

818

**Assinatura do pesquisador responsável**

819

820

821

---

822

823

**Nome completo do representante legal**

824

1  
2  
3  
4  
5  
6  
7  
8  
9  
10  
11  
12  
13  
14  
15  
16  
17  
18  
19  
20  
21  
22  
23  
24  
25  
26  
27  
28  
29  
30  
31  
32  
33  
34  
35  
36  
37  
38  
39  
40  
41  
42  
43  
44  
45  
46  
47  
48  
49  
50  
51  
52  
53  
54  
55  
56  
57  
58  
59  
60

825

826

Data: \_\_\_/\_\_\_/\_\_\_

---

827

**Assinatura do representante legal**

828

829

---

830

For peer review only



**HOSPITAL ISRAELITA ALBERT EINSTEIN-SP****UNIFIED REVIEW – ETHICAL AND RESEARCH COMMITTEE****RESEARCH PROJECT DATA**

**Project title:** Cost-effectiveness of rotator cuff repair surgery by open and arthroscopic techniques: a randomized control trial

**Responsible researcher:** Mario Lenza

**Area:**

**Version:** 2

**CAAE:** 19182619.3.1001.0071

**Proponent institution:** SOCIEDADE BENEF ISRAELITABRAS HOSPITAL ALBERT EINSTEIN

**Main funding source:** SOCIEDADE BENEF ISRAELITABRAS HOSPITAL ALBERT EINSTEIN

**TECHNICAL REPORT INFORMATION**

**REVIEW #:** 3.636.334

**Project:**

This is a randomized clinical trial that will be carried out in two health facilities (Hospital M'Boi Mirim e Hospital Alvorada). The objective is to compare method of repair of the shoulder rotator cuff, open or arthroscopic. The study will be funding by the São Paulo Research Foundation – FAPESP.

**Objective of the study:**

To compare open or arthroscopic method of repair of the rotator cuff, and determine which method has the best cost effectiveness ratio.

**Risks and benefits Assessment:**

To respond to the request by the Ethical and Research Committee, in this new version authors describe specific risks for each surgical technique that will be study in the project.

Continuing – report # 3.636.334

### Comments and considerations on the study:

Authors have addressed all requested changes. We believe that there is not need to hire a specific insurance, present statement of all participating institutions. Authors will be the solely responsible to treatment of possible adverse events as a result of the study. We also did not included cost of arthroscopy material, once they would exceed the total funding received for this study. For this reason, although the cost of arthroscopy would be included in total of treatment for the responsible institution, there are not real ethical deviation that avoids project execution.

### Considerations on mandatory terms and conditions:

Required terms were presented, including the agreeing term of co-participant institution.

The consent form was revised, now its language is clear, and risks for each surgery technique were clarified.

### Recommendations:

ERC is responsible to “follow-up the development of projects by providing semester reports to researchers and other monitoring strategies, taking into consideration the risk of the study”. For this reason, the researcher/responsible needs to forward to Einstein’s ERC partial reports every 6 months and a final report of the project, up to 30 days after its conclusion.

Partial report, final report, or study withdrawal or closure:

<https://www.einstein.br/pesquisa/servicos/comite-etica-em-pesquisa/relatorio-pesquisas-aprovadas>

Following the CNS 466/2012 resolution, the responsible researcher must guarantee confidentially and anonymity of procedures, imaging rights, and non-stigmatization of participants of the study, guaranteeing the non-use of information that may harm people and/or communities, including in terms of self-esteem, prestige, and/or finance and economic aspects.

In case of severe adverse events, please consider the guidance in the link:

<http://apps.einstein.br/forms/pesquisa/form-adve.html>

If event related to procedure of the study occurs or medication in use, please, fulfil the Severe Adverse Event from CONEP at

[http://conselho.saude.gov.br/web\\_comissoes/conep/aquivos/FORMULARIO\\_EAS\\_CONEP\\_2011.doc](http://conselho.saude.gov.br/web_comissoes/conep/aquivos/FORMULARIO_EAS_CONEP_2011.doc)

### Conclusion or pending and inadequacy list:

After analysis, the following documents were approved:

1 - Research project – version dated September 27, 2019.

## 2 - Consent Term – Version 2 dated September 25, 2019.

Continuing – report # 3.636.334

**Final considerations and ERC's criteria:**

DOCUMENTS APPROVED BY ERC OF THE HOSPITAL ISRAELITA ALBERT EINSTEIN IN A MEETING HELD IN OCTOBER 08, 2019.

**This report was elaborated based on the following documents:**

| Document                                    | File                                                             | Upload date            | Author                   | Status   |
|---------------------------------------------|------------------------------------------------------------------|------------------------|--------------------------|----------|
| Basic information of the project            | PB_INFORMAÇÕES BÁSICAS DO PROJETO_1381072.pdf                    | 27/09/2019<br>17:47:33 |                          | Accepted |
| Statement of Institution and Infrastructure | Declaracao_de_assistencia_e_responsabilidade_Mboi_Mirim.pdf      | 27/09/2019<br>17:45:37 | Rafael Pierami           | Accepted |
| Consent form / Absence justification        | TCLE.docx                                                        | 27/09/2019<br>17:37:41 | Rafael Pierami           | Accepted |
| Consent form / Absence of justification     | TCLE_sem_demarcacoes.docx                                        | 27/09/2019<br>17:37:23 | Rafael Pierami           | Accepted |
| Statement of Institution and Infrastructure | Termo_de_anuencia_Alvorada.pdf                                   | 27/09/2019<br>17:37:03 | Rafael Pierami           | Accepted |
| Detailed Project/ Researcher's brochure     | Projeto_ECR_Manguito_Aberto_vs_Artroscopico_sem_demarcacoes.docx | 27/09/2019<br>17:35:44 | Rafael Pierami           | Accepted |
| Detailed Project/ Researcher's brochure     | Projeto_ECR_Manguito_Aberto_vs_Artroscopico_27_09_19.docx        | 27/09/2019<br>17:35:30 | Rafael Pierami           | Accepted |
| Statement of Researchers                    | carta_resposta_CEP_HIAE.docx                                     | 27/09/2019<br>17:35:15 | Rafael Pierami           | Accepted |
| Statement of Researchers                    | carta_resposta_CEP_HIAE_assinada.pdf                             | 27/09/2019<br>17:35:01 | Rafael Pierami           | Accepted |
| Statement of institution and infrastructure | declaracao_assistencia_alvorada.pdf                              | 27/09/2019<br>17:34:39 | Rafael Pierami           | Accepted |
| Chronogram                                  | cronograma.xlsx                                                  | 27/09/2019<br>17:33:59 | Rafael Pierami           | Accepted |
| Statement of Researchers                    | Declaracao_Resp_Pesq_Mario.pdf                                   | 16/08/2019<br>15:50:58 | LETICIA FONSECA DA COSTA | Accepted |
| Others                                      | AnuenciaGestorAreaMario.pdf                                      | 16/08/2019<br>15:49:39 | LETICIA FONSECA DA COSTA | Accepted |
| Title page                                  | Folha_de_rosto_plataforma_Brasil_ECR_manguito.pdf                | 12/08/2019<br>19:08:38 | Rafael Pierami           | Accepted |
| Statement of institution and infrastructure | autarquia_mboi_mirim.pdf                                         | 12/08/2019<br>19:07:39 | Rafael Pierami           | Accepted |
| Statement of institution and infrastructure | Termo_anuencia_mboi_mirim.pdf                                    | 12/08/2019<br>19:06:09 | Rafael Pierami           | Accepted |

1  
2  
3 **Status of the report:**  
4

5 Approved  
6

7 **Documents requires CONEP evaluation:**  
8

9 No  
10  
11  
12

13  
14 October 11, 2019  
15  
16

17  
18 **Responsible signature:**  
19

20  
21  
22 **Fabio Pires de Souza Santos (Coordinator)**  
23  
24

25 \_\_\_\_\_  
26

27 **Address:** Av. Albert Einstein 627 - 2ss - Morumbi - SP – Zip Code: 05.652-000  
28

29 **Phone:** (11)2151-3729  
30

31 **Fax:** (11)2151-0273 **E-mail:** cep@einstein.br  
32  
33  
34  
35  
36  
37  
38  
39  
40  
41  
42  
43  
44  
45  
46  
47  
48  
49  
50  
51  
52  
53  
54  
55  
56  
57  
58  
59  
60

**DISPATCH****Grant number** 2019/0259-3**Support type** Regular programs / Research support / Research project / Research project  
– Regular – Continuous Flow**Status** Ongoing**Term** June 01, 2019 to May 31, 2021**Grantee** Mário Lenza**Principal investigator** Mário Lenza**DISPATCH PAGE OF THE INITIAL PROPOSAL - REGULAR RESEARCH PROJECT****Result**

Granted

**Dispatch date**

May 24, 2019

**Budgeted amount**

| <b>Benefits</b>                              | <b>Requested (R\$)</b> | <b>Dispatched (R\$)</b> |
|----------------------------------------------|------------------------|-------------------------|
| Funds                                        |                        |                         |
| Permanent material                           | 0.00                   | 0.00                    |
| Costs                                        |                        |                         |
| Transportation                               | 0.00                   | 0.00                    |
| Daily expenses                               | 0.00                   | 0.00                    |
| Consumption material                         | 135,520.00             | 121,968.00              |
| Third parties                                | 0.00                   | 0.00                    |
| Technical reserve for complementary benefits | 16,000.00              | 16,000.00               |
| Technical reserve for Infrastructure         | 20,328.00              | 18,295.20               |
| Importing provisioning                       |                        |                         |
| <b>Total</b>                                 | <b>171,848.00</b>      | <b>156,263.20</b>       |

**Scholarship quotes**

None requested

**Project team****Members of the team – requested**

| Name                        | Position             | Complementary benefits | Term                           |
|-----------------------------|----------------------|------------------------|--------------------------------|
| Mário Lenza                 | Principal researcher | Yes                    | April 1, 2019 – March 31, 2021 |
| Mário Ferreti Filho         | Associate researcher | -                      | April 1, 2019 – March 31, 2021 |
| Isadora Orlando de Oliveira | Technical support    | -                      | April 1, 2019 – March 31, 2021 |
| Rafael Pierami              | Technical support    | -                      | April 1, 2019 – March 31, 2021 |
| Ana Claudia Pereira Sanguin | Administrative staff | -                      | April 1, 2019 – March 31, 2021 |
| Tania Oliveira Lopes        | Administrative staff | -                      | April 1, 2019 – March 31, 2021 |

### Members of the team – dispatched

| Name                        | Position             | Complementary benefits | Term                        |
|-----------------------------|----------------------|------------------------|-----------------------------|
| Mário Lenza                 | Principal researcher | Yes                    | June 1, 2019 – May 31, 2021 |
| Mário Ferreti Filho         | Associate researcher | -                      | June 1, 2019 – May 31, 2021 |
| Isadora Orlando de Oliveira | Technical support    | -                      | June 1, 2019 – May 31, 2021 |
| Rafael Pierami              | Technical support    | -                      | June 1, 2019 – May 31, 2021 |
| Ana Claudia Pereira Sanguin | Administrative staff | -                      | June 1, 2019 – May 31, 2021 |
| Tania Oliveira Lopes        | Administrative staff | -                      | June 1, 2019 – May 31, 2021 |

### Project planning

**Start date:** June 1, 2019

**Duration:** 24 months

**End date:** May 31, 2021

**Field of knowledge:** Health

**Scientific report (quantity):** 2

**Scientific report (submission date):** May 30, 2020  
June 30, 2021

**Financial report (quantity):** 2

**Financial report (submission date):** May 30, 2020  
June 30, 2021

**Category of the research:** T/PP [AUTOR, VERIFICAR ACRÔNIMO]

### Observations / Transcriptions / Statements

#### Observations to the responsible

I am pleased to inform that your research grant mentioned above, after careful analysis by the FAPESP committee, has been approved. Please be aware that items in your budget

1  
2  
3 were revised, and some were not approved, and others were approved but for reduced  
4 amount. An e-mail will be sent with instructions for you to confirm the interest in the  
5 grant.  
6

7  
8 The use of the grant must follow instructions of the guideline on the use of resources,  
9 financial report, and technical reserve.  
10

11 Further information about this dispatch is available at “Sistema SAGe -  
12 [www.fapesp.br/sage](http://www.fapesp.br/sage) .  
13

14  
15 If you have any questions or need more information about this grant, please use the  
16 channel made available for this purpose at "Talk to FAPESP" - [www.fapesp.br/converse](http://www.fapesp.br/converse).  
17

18 Sincerely,  
19

20 Carlos Henrique de Brito Cruz  
21 Scientific director  
22

### 23 **Statements for the responsible**

24  
25  
26 None  
27

### 28 **Review to the responsible of the proposal**

#### 29 **General analysis of the proposal including 1 – applicant’s academic experience, 2 –** 30 **research project, 3 – budget.**

31  
32 This is a good proposal, although the final result of the study is predicted, considering  
33 finding of the published in the international literature concerning the costs for each type  
34 of surgery. That said, the current proposal can have a positive impact, considering that  
35 final result may provide guidance for decision making of future Brazilian surgeries, who  
36 may choose the lower cost procedure, however, this is not the only factor to take into  
37 account.  
38

39  
40 The applicant’s academic experience is adequate, especially for his deeply experience  
41 with shoulder surgery that can be seen by the studies he published in the area. The project  
42 itself is fairly simple but well planned and written, in addition it involves a high number  
43 of patients (100 individuals) and surgeons. It is important to note that each surgeon’s  
44 preference and bias should be considered, as well as final clinical result. This bias needs  
45 to be careful followed-up by the principal researcher in order to prevent high standard  
46 deviations.  
47  
48  
49

#### 50 **Please analyze the applicant’s academic experience by considering** 51 **scientific/technological production.**

52  
53 As previously mentioned, the applicant’s academic experience is fair. He holds a PhD  
54 from UNIFESP for 9 years now, and a post-doctoral degree from university in Australia  
55 in 2011. In addition, he is professor at Einstein Medical College for 6 or 7 years. The 10  
56 scientific publications listed in his application are all relevant and involved topics of his  
57 specialty and correlated areas. The grantee also acts as supervisor in graduate program,  
58 including projects with FAPESP funding. His scientific production totalize 57 papers and  
59  
60

1  
2  
3 2 book chapters. Currently he supervises two PhD students, and he had completed the  
4 supervision of one master-degree student and two PhD student.  
5

6  
7 **Please specify the applicant's experience with projects related to the area**

8  
9 After the analysis of the applicant's CV, I believe his is the leader in his research area at  
10 Einstein Medical College. His performance seems adequate, given the graduate  
11 supervisions he had completed.  
12

13  
14 **Please analyze the applicant's ability to educate new researchers**

15  
16 As stated above, the applicant performance in this regard is adequate.  
17

18  
19 **If applicable, please analyze the performance of applicant with previous funding  
20 requests submitted to FAPESP**

21  
22 Not applicable  
23

24  
25 **Provide/analyze other relevant issue of the applicant's academic experience**

26  
27 None to report  
28

29  
30 **Applicant's academic experience – Final assessment**

- 31 ( ) Excellent  
32 ( x ) Very good  
33 ( ) Good  
34 ( ) Fair  
35 ( ) Inadequate  
36

37  
38 **Please analyze research project, considering the following:**

39  
40 **Originality and contribution to the research area**

41  
42 As stated above, the results of the present study are somewhat predictable, but the topic  
43 is relevant, especially for the focus on less costly surgical procedure that is adequate for  
44 the reality of our country.  
45

46  
47 **Theoretical framework and methodology**

48  
49 The project is simple, perhaps, this is reason why the results will be efficient. Of note are  
50 the bias problem due to the personal preferences of surgeons, and the need to equalize as  
51 much as possible these preferences in order to prevent unnecessary deviations in cost of  
52 the procedures. Another issue is the type implants to be used. Implants need need to be  
53 the same to all patients, whenever possible.  
54

55  
56 **Funding for technical training**

57  
58 None to report  
59  
60



1  
2  
3 **Total funding requested justifies the scientific and technological relevance of the**  
4 **project**

- 5  
6  
7 ( x ) Yes  
8 ( ) No  
9

10  
11 **Project term is adequate for the project development**

- 12  
13  
14 ( x ) Yes  
15 ( ) No  
16

17 **Infrastructure of the institution where the study will be conduct adequate**

- 18  
19 ( x ) Yes  
20 ( ) No  
21

22 **Project will include scientific initiation and graduate students**

- 23  
24  
25 ( x ) Yes  
26 ( ) No  
27

28 **Final assessment of the project**

- 29  
30 ( ) Excellent  
31 ( x ) Very good  
32 ( ) Very good, but mild issues should be addressed  
33 ( ) Good  
34 ( ) Good, but it has limitations to be addressed  
35 ( ) Fair  
36 ( ) Seriously limited  
37  
38  
39

40 **Please analyze the budget, considering the following:**

41  
42 **Permanent material and equipment (>R\$20.000,00) are justified**

- 43  
44 ( x ) Yes  
45 ( ) No  
46  
47  
48

49 **The rationale of the proposal is adequate**

- 50  
51 ( x ) Yes  
52 ( ) No  
53  
54  
55

56 **Materials and equipment needed that FAPESP should and must request a**  
57 **partnership with third parties**

58  
59 Not applicable  
60

1  
2  
3  
4 **Request for consumption items is adequate**  
5

6 The consumption items are crucial for development of the project.  
7

8  
9 **Services and materials that needed to be requested from third parties**  
10

11 Not applicable  
12

13 **Services that should be provided by the institution of the study upon FAPESP**  
14 **request**  
15

16 Not applicable  
17

18  
19 **Please provide, if any, value suggestions to be replace in the project in the following**  
20 **items:**  
21

22 **National permanent items**  
23

24 None to report  
25

26 **International permanent items**  
27

28 None to report  
29

30 **National consumption items**  
31

32 As stated above, applicant requested implants  
33

34 **Third parties services**  
35

36 None to report  
37

38 **International services**  
39

40 None to report  
41

42 **National transportation**  
43

44 None to report  
45

46 **International transportation**  
47

48 None to report  
49

50 **National daily expenses**  
51

52 None to report  
53

54 **International daily expenses**  
55

56 None to report  
57  
58  
59  
60

1  
2  
3 None to report  
4

5 **National miscellaneous expenses**  
6

7  
8 None to report  
9

10 **International miscellaneous expenses**  
11

12 None to report  
13

14 **Total funding requested in national currency**  
15

16 Adequate  
17

18 **Total funding requested in international currency**  
19

20 Adequate  
21

22 **Sponsorship – considering the analyses above, please suggest number of technical training, if any**  
23

24 Technical training I (TT-I)  
25

26 Technical training II (TT-II)  
27

28 Technical training III (TT-III)  
29

30 Technical training IV (TT-IV)  
31

32 Technical training IVa (TT-IVa)  
33

34 Technical training V (TT-V)  
35

36 **Final assessment of the budget**  
37

38 ( x ) Adequate  
39

40 ( ) Adequate, but the suggestions above should be addressed  
41

42 ( ) Inadequate  
43

44 **Check inadequacies observed, if any, on the following items:**  
45

46 **Applicant's academic experience**  
47

48 ( ) Inadequate scientific/technological production for the development of the project  
49

50 ( ) Limited scientific/technological production  
51

52 ( ) Applicant lacks experience in the area of the project  
53

54 **Research project**  
55

56 ( ) Objective of the project is unclear  
57

58 ( ) Objective of the project if limited for the complete development of the project  
59

60 ( ) Project lacks originality  
61

( ) Limited theoretical framework/methodology  
62

( ) Amount of work inadequate for the funding requested  
63

( ) Project execution is questionable  
64

( ) High cost considering the scientific relevance to the area  
65

( ) Project's deadline is unrealistic

### Budget proposal

( ) Total of items requested is unclear

( ) Overestimated budget

### Other limitations, if any:

None to report

### Statements related to the grant:

None to report

### Detailed budget

#### Consumption item – National

| Item | Description                                                                                  | Requested<br>Amount (R\$) | Dispatched<br>Amount (R\$) |
|------|----------------------------------------------------------------------------------------------|---------------------------|----------------------------|
| 1    | 140 units – 5.0<br>FASTIN RC<br>ANCHOR with<br>ORThOCORd<br>(#222993) -<br>Johnson & Johnson | 135,520.00                | 121,968.00                 |

#### Consumption item – National

Not applicable

#### Technical reserve – complementary benefits

|                                         |                                                      |
|-----------------------------------------|------------------------------------------------------|
| <b>Recipients</b>                       | Responsible researcher (June 1, 2019 – May 31, 2021) |
| <b>Currency</b>                         | R\$                                                  |
| <b>Value (unit) - annual</b>            | 8,000.00                                             |
| <b>Date</b>                             | May 25, 2019                                         |
| <b>Amount of complementary benefits</b> | R\$16,000.00                                         |

# Reporting checklist for protocol of a clinical trial.

Based on the SPIRIT guidelines.

**Title:** Cost-Utility of Rotator Cuff Repair Surgery by Open and Arthroscopic Techniques: Study Protocol for a Randomized Clinical Trial.

|                                                         |                     | Reporting Item                                                                                                                                                                                                                                                                           | Page Number |
|---------------------------------------------------------|---------------------|------------------------------------------------------------------------------------------------------------------------------------------------------------------------------------------------------------------------------------------------------------------------------------------|-------------|
| <b>Administrative information</b>                       |                     |                                                                                                                                                                                                                                                                                          |             |
| Title                                                   | <a href="#">#1</a>  | Descriptive title identifying the study design, population, interventions, and, if applicable, trial acronym                                                                                                                                                                             | 01          |
| Trial registration                                      | <a href="#">#2a</a> | Trial identifier and registry name. If not yet registered, name of intended registry                                                                                                                                                                                                     | 03          |
| Trial registration: data set                            | <a href="#">#2b</a> | All items from the World Health Organization Trial Registration Data Set                                                                                                                                                                                                                 | 05          |
| Protocol version                                        | <a href="#">#3</a>  | Date and version identifier                                                                                                                                                                                                                                                              | 17          |
| Funding                                                 | <a href="#">#4</a>  | Sources and types of financial, material, and other support                                                                                                                                                                                                                              | 18          |
| Roles and responsibilities: contributorship             | <a href="#">#5a</a> | Names, affiliations, and roles of protocol contributors                                                                                                                                                                                                                                  | 18;19       |
| Roles and responsibilities: sponsor contact information | <a href="#">#5b</a> | Name and contact information for the trial sponsor                                                                                                                                                                                                                                       | 01          |
| Roles and responsibilities: sponsor and funder          | <a href="#">#5c</a> | Role of study sponsor and funders, if any, in study design; collection, management, analysis, and interpretation of data; writing of the report; and the decision to submit the report for publication, including whether they will have ultimate authority over any of these activities | 06          |
| Roles and responsibilities:                             | <a href="#">#5d</a> | Composition, roles, and responsibilities of the coordinating centre, steering committee, endpoint adjudication committee,                                                                                                                                                                | 05          |

|    |                           |                      |                                                                    |       |
|----|---------------------------|----------------------|--------------------------------------------------------------------|-------|
| 1  | committees                |                      | data management team, and other individuals or groups              |       |
| 2  |                           |                      | overseeing the trial, if applicable (see Item 21a for data         |       |
| 3  |                           |                      | monitoring committee)                                              |       |
| 4  |                           |                      |                                                                    |       |
| 5  | <b>Introduction</b>       |                      |                                                                    |       |
| 6  |                           |                      |                                                                    |       |
| 7  |                           |                      |                                                                    |       |
| 8  | Background and            | <a href="#">#6a</a>  | Description of research question and justification for             | 3;4;5 |
| 9  | rationale                 |                      | undertaking the trial, including summary of relevant studies       |       |
| 10 |                           |                      | (published and unpublished) examining benefits and harms for       |       |
| 11 |                           |                      | each intervention                                                  |       |
| 12 |                           |                      |                                                                    |       |
| 13 |                           |                      |                                                                    |       |
| 14 | Background and            | <a href="#">#6b</a>  | Explanation for choice of comparators                              | 3;4;5 |
| 15 | rationale: choice of      |                      |                                                                    |       |
| 16 | comparators               |                      |                                                                    |       |
| 17 |                           |                      |                                                                    |       |
| 18 |                           |                      |                                                                    |       |
| 19 | Objectives                | <a href="#">#7</a>   | Specific objectives or hypotheses                                  | 5     |
| 20 |                           |                      |                                                                    |       |
| 21 |                           |                      |                                                                    |       |
| 22 | Trial design              | <a href="#">#8</a>   | Description of trial design including type of trial (eg, parallel  | 5     |
| 23 |                           |                      | group, crossover, factorial, single group), allocation ratio, and  |       |
| 24 |                           |                      | framework (eg, superiority, equivalence, non-inferiority,          |       |
| 25 |                           |                      | exploratory)                                                       |       |
| 26 |                           |                      |                                                                    |       |
| 27 |                           |                      |                                                                    |       |
| 28 |                           |                      |                                                                    |       |
| 29 | <b>Methods:</b>           |                      |                                                                    |       |
| 30 | <b>Participants,</b>      |                      |                                                                    |       |
| 31 | <b>interventions, and</b> |                      |                                                                    |       |
| 32 | <b>outcomes</b>           |                      |                                                                    |       |
| 33 |                           |                      |                                                                    |       |
| 34 |                           |                      |                                                                    |       |
| 35 |                           |                      |                                                                    |       |
| 36 | Study setting             | <a href="#">#9</a>   | Description of study settings (eg, community clinic, academic      | 5;6   |
| 37 |                           |                      | hospital) and list of countries where data will be collected.      |       |
| 38 |                           |                      | Reference to where list of study sites can be obtained             |       |
| 39 |                           |                      |                                                                    |       |
| 40 |                           |                      |                                                                    |       |
| 41 | Eligibility criteria      | <a href="#">#10</a>  | Inclusion and exclusion criteria for participants. If applicable,  | 6;7   |
| 42 |                           |                      | eligibility criteria for study centres and individuals who will    |       |
| 43 |                           |                      | perform the interventions (eg, surgeons, psychotherapists)         |       |
| 44 |                           |                      |                                                                    |       |
| 45 |                           |                      |                                                                    |       |
| 46 | Interventions:            | <a href="#">#11a</a> | Interventions for each group with sufficient detail to allow       | 8;9   |
| 47 | description               |                      | replication, including how and when they will be administered      |       |
| 48 |                           |                      |                                                                    |       |
| 49 |                           |                      |                                                                    |       |
| 50 | Interventions:            | <a href="#">#11b</a> | Criteria for discontinuing or modifying allocated interventions    | 12    |
| 51 | modifications             |                      | for a given trial participant (eg, drug dose change in response to |       |
| 52 |                           |                      | harms, participant request, or improving / worsening disease)      |       |
| 53 |                           |                      |                                                                    |       |
| 54 |                           |                      |                                                                    |       |
| 55 | Interventions:            | <a href="#">#11c</a> | Strategies to improve adherence to intervention protocols, and     | 10;11 |
| 56 | adherence                 |                      | any procedures for monitoring adherence (eg, drug tablet return;   |       |
| 57 |                           |                      | laboratory tests)                                                  |       |
| 58 |                           |                      |                                                                    |       |
| 59 |                           |                      |                                                                    |       |
| 60 |                           |                      |                                                                    |       |

|    |                              |                      |                                                                  |          |
|----|------------------------------|----------------------|------------------------------------------------------------------|----------|
| 1  | Interventions:               | <a href="#">#11d</a> | Relevant concomitant care and interventions that are permitted   | NA       |
| 2  | concomitant care             |                      | or prohibited during the trial                                   |          |
| 3  |                              |                      |                                                                  |          |
| 4  |                              |                      |                                                                  |          |
| 5  | Outcomes                     | <a href="#">#12</a>  | Primary, secondary, and other outcomes, including the specific   | 10;11;12 |
| 6  |                              |                      | measurement variable (eg, systolic blood pressure), analysis     |          |
| 7  |                              |                      | metric (eg, change from baseline, final value, time to event),   |          |
| 8  |                              |                      | method of aggregation (eg, median, proportion), and time point   |          |
| 9  |                              |                      | for each outcome. Explanation of the clinical relevance of       |          |
| 10 |                              |                      | chosen efficacy and harm outcomes is strongly recommended        |          |
| 11 |                              |                      |                                                                  |          |
| 12 |                              |                      |                                                                  |          |
| 13 |                              |                      |                                                                  |          |
| 14 | Participant timeline         | <a href="#">#13</a>  | Time schedule of enrolment, interventions (including any run-    | 13       |
| 15 |                              |                      | ins and washouts), assessments, and visits for participants. A   |          |
| 16 |                              |                      | schematic diagram is highly recommended (see Figure)             |          |
| 17 |                              |                      |                                                                  |          |
| 18 |                              |                      |                                                                  |          |
| 19 |                              |                      |                                                                  |          |
| 20 | Sample size                  | <a href="#">#14</a>  | Estimated number of participants needed to achieve study         | 6        |
| 21 |                              |                      | objectives and how it was determined, including clinical and     |          |
| 22 |                              |                      | statistical assumptions supporting any sample size calculations  |          |
| 23 |                              |                      |                                                                  |          |
| 24 |                              |                      |                                                                  |          |
| 25 | Recruitment                  | <a href="#">#15</a>  | Strategies for achieving adequate participant enrolment to reach | 8        |
| 26 |                              |                      | target sample size                                               |          |
| 27 |                              |                      |                                                                  |          |
| 28 |                              |                      |                                                                  |          |
| 29 | <b>Methods: Assignment</b>   |                      |                                                                  |          |
| 30 | <b>of interventions (for</b> |                      |                                                                  |          |
| 31 | <b>controlled trials)</b>    |                      |                                                                  |          |
| 32 |                              |                      |                                                                  |          |
| 33 |                              |                      |                                                                  |          |
| 34 | Allocation: sequence         | <a href="#">#16a</a> | Method of generating the allocation sequence (eg, computer-      | 7;8      |
| 35 | generation                   |                      | generated random numbers), and list of any factors for           |          |
| 36 |                              |                      | stratification. To reduce predictability of a random sequence,   |          |
| 37 |                              |                      | details of any planned restriction (eg, blocking) should be      |          |
| 38 |                              |                      | provided in a separate document that is unavailable to those who |          |
| 39 |                              |                      | enrol participants or assign interventions                       |          |
| 40 |                              |                      |                                                                  |          |
| 41 |                              |                      |                                                                  |          |
| 42 |                              |                      |                                                                  |          |
| 43 |                              |                      |                                                                  |          |
| 44 | Allocation                   | <a href="#">#16b</a> | Mechanism of implementing the allocation sequence (eg, central   | 7;8      |
| 45 | concealment                  |                      | telephone; sequentially numbered, opaque, sealed envelopes),     |          |
| 46 | mechanism                    |                      | describing any steps to conceal the sequence until interventions |          |
| 47 |                              |                      | are assigned                                                     |          |
| 48 |                              |                      |                                                                  |          |
| 49 |                              |                      |                                                                  |          |
| 50 |                              |                      |                                                                  |          |
| 51 | Allocation:                  | <a href="#">#16c</a> | Who will generate the allocation sequence, who will enrol        | 7;8      |
| 52 | implementation               |                      | participants, and who will assign participants to interventions  |          |
| 53 |                              |                      |                                                                  |          |
| 54 |                              |                      |                                                                  |          |
| 55 | Blinding (masking)           | <a href="#">#17a</a> | Who will be blinded after assignment to interventions (eg, trial | 8        |
| 56 |                              |                      | participants, care providers, outcome assessors, data analysts), |          |
| 57 |                              |                      | and how                                                          |          |
| 58 |                              |                      |                                                                  |          |
| 59 |                              |                      |                                                                  |          |
| 60 |                              |                      |                                                                  |          |

|    |                            |                      |                                                                    |             |
|----|----------------------------|----------------------|--------------------------------------------------------------------|-------------|
| 1  | Blinding (masking):        | <a href="#">#17b</a> | If blinded, circumstances under which unblinding is permissible,   | 8           |
| 2  | emergency unblinding       |                      | and procedure for revealing a participant's allocated intervention |             |
| 3  |                            |                      | during the trial                                                   |             |
| 4  |                            |                      |                                                                    |             |
| 5  |                            |                      |                                                                    |             |
| 6  | <b>Methods: Data</b>       |                      |                                                                    |             |
| 7  | <b>collection,</b>         |                      |                                                                    |             |
| 8  | <b>management, and</b>     |                      |                                                                    |             |
| 9  | <b>analysis</b>            |                      |                                                                    |             |
| 10 |                            |                      |                                                                    |             |
| 11 |                            |                      |                                                                    |             |
| 12 |                            |                      |                                                                    |             |
| 13 | Data collection plan       | <a href="#">#18a</a> | Plans for assessment and collection of outcome, baseline, and      | 10;11;12;13 |
| 14 |                            |                      | other trial data, including any related processes to promote data  |             |
| 15 |                            |                      | quality (eg, duplicate measurements, training of assessors) and a  |             |
| 16 |                            |                      | description of study instruments (eg, questionnaires, laboratory   |             |
| 17 |                            |                      | tests) along with their reliability and validity, if known.        |             |
| 18 |                            |                      | Reference to where data collection forms can be found, if not in   |             |
| 19 |                            |                      | the protocol                                                       |             |
| 20 |                            |                      |                                                                    |             |
| 21 | Data collection plan:      | <a href="#">#18b</a> | Plans to promote participant retention and complete follow-up,     | 10;11;12;13 |
| 22 | retention                  |                      | including list of any outcome data to be collected for             |             |
| 23 |                            |                      | participants who discontinue or deviate from intervention          |             |
| 24 |                            |                      | protocols                                                          |             |
| 25 |                            |                      |                                                                    |             |
| 26 |                            |                      |                                                                    |             |
| 27 |                            |                      |                                                                    |             |
| 28 |                            |                      |                                                                    |             |
| 29 |                            |                      |                                                                    |             |
| 30 |                            |                      |                                                                    |             |
| 31 | Data management            | <a href="#">#19</a>  | Plans for data entry, coding, security, and storage, including any | 10;11       |
| 32 |                            |                      | related processes to promote data quality (eg, double data entry;  |             |
| 33 |                            |                      | range checks for data values). Reference to where details of data  |             |
| 34 |                            |                      | management procedures can be found, if not in the protocol         |             |
| 35 |                            |                      |                                                                    |             |
| 36 |                            |                      |                                                                    |             |
| 37 |                            |                      |                                                                    |             |
| 38 | Statistics: outcomes       | <a href="#">#20a</a> | Statistical methods for analysing primary and secondary            | 14          |
| 39 |                            |                      | outcomes. Reference to where other details of the statistical      |             |
| 40 |                            |                      | analysis plan can be found, if not in the protocol                 |             |
| 41 |                            |                      |                                                                    |             |
| 42 |                            |                      |                                                                    |             |
| 43 | Statistics: additional     | <a href="#">#20b</a> | Methods for any additional analyses (eg, subgroup and adjusted     | 14          |
| 44 | analyses                   |                      | analyses)                                                          |             |
| 45 |                            |                      |                                                                    |             |
| 46 |                            |                      |                                                                    |             |
| 47 | Statistics: analysis       | <a href="#">#20c</a> | Definition of analysis population relating to protocol non-        | 14          |
| 48 | population and missing     |                      | adherence (eg, as randomised analysis), and any statistical        |             |
| 49 | data                       |                      | methods to handle missing data (eg, multiple imputation)           |             |
| 50 |                            |                      |                                                                    |             |
| 51 |                            |                      |                                                                    |             |
| 52 | <b>Methods: Monitoring</b> |                      |                                                                    |             |
| 53 |                            |                      |                                                                    |             |
| 54 |                            |                      |                                                                    |             |
| 55 | Data monitoring:           | <a href="#">#21a</a> | Composition of data monitoring committee (DMC); summary of         | 20          |
| 56 | formal committee           |                      | its role and reporting structure; statement of whether it is       |             |
| 57 |                            |                      | independent from the sponsor and competing interests; and          |             |
| 58 |                            |                      |                                                                    |             |
| 59 |                            |                      |                                                                    |             |
| 60 |                            |                      |                                                                    |             |



|    |                          |                                                                                        |       |
|----|--------------------------|----------------------------------------------------------------------------------------|-------|
| 1  |                          | reference to where further details about its charter can be found,                     |       |
| 2  |                          | if not in the protocol. Alternatively, an explanation of why a                         |       |
| 3  |                          | DMC is not needed                                                                      |       |
| 4  |                          |                                                                                        |       |
| 5  | Data monitoring:         | <a href="#">#21b</a> Description of any interim analyses and stopping guidelines,      | 20    |
| 6  | interim analysis         | including who will have access to these interim results and make                       |       |
| 7  |                          | the final decision to terminate the trial                                              |       |
| 8  |                          |                                                                                        |       |
| 9  |                          |                                                                                        |       |
| 10 |                          |                                                                                        |       |
| 11 | Harms                    | <a href="#">#22</a> Plans for collecting, assessing, reporting, and managing solicited | 12    |
| 12 |                          | and spontaneously reported adverse events and other unintended                         |       |
| 13 |                          | effects of trial interventions or trial conduct                                        |       |
| 14 |                          |                                                                                        |       |
| 15 |                          |                                                                                        |       |
| 16 | Auditing                 | <a href="#">#23</a> Frequency and procedures for auditing trial conduct, if any, and   | NA    |
| 17 |                          | whether the process will be independent from investigators and                         |       |
| 18 |                          | the sponsor                                                                            |       |
| 19 |                          |                                                                                        |       |
| 20 |                          |                                                                                        |       |
| 21 | <b>Ethics and</b>        |                                                                                        |       |
| 22 | <b>dissemination</b>     |                                                                                        |       |
| 23 |                          |                                                                                        |       |
| 24 |                          |                                                                                        |       |
| 25 | Research ethics          | <a href="#">#24</a> Plans for seeking research ethics committee / institutional        | 5     |
| 26 | approval                 | review board (REC / IRB) approval                                                      |       |
| 27 |                          |                                                                                        |       |
| 28 |                          |                                                                                        |       |
| 29 | Protocol amendments      | <a href="#">#25</a> Plans for communicating important protocol modifications (eg,      | 6     |
| 30 |                          | changes to eligibility criteria, outcomes, analyses) to relevant                       |       |
| 31 |                          | parties (eg, investigators, REC / IRBs, trial participants, trial                      |       |
| 32 |                          | registries, journals, regulators)                                                      |       |
| 33 |                          |                                                                                        |       |
| 34 |                          |                                                                                        |       |
| 35 |                          |                                                                                        |       |
| 36 | Consent or assent        | <a href="#">#26a</a> Who will obtain informed consent or assent from potential trial   | 7     |
| 37 |                          | participants or authorised surrogates, and how (see Item 32)                           |       |
| 38 |                          |                                                                                        |       |
| 39 |                          |                                                                                        |       |
| 40 | Consent or assent:       | <a href="#">#26b</a> Additional consent provisions for collection and use of           | NA    |
| 41 | ancillary studies        | participant data and biological specimens in ancillary studies, if                     |       |
| 42 |                          | applicable                                                                             |       |
| 43 |                          |                                                                                        |       |
| 44 |                          |                                                                                        |       |
| 45 | Confidentiality          | <a href="#">#27</a> How personal information about potential and enrolled              | 10;12 |
| 46 |                          | participants will be collected, shared, and maintained in order to                     |       |
| 47 |                          | protect confidentiality before, during, and after the trial                            |       |
| 48 |                          |                                                                                        |       |
| 49 |                          |                                                                                        |       |
| 50 | Declaration of interests | <a href="#">#28</a> Financial and other competing interests for principal              | 19    |
| 51 |                          | investigators for the overall trial and each study site                                |       |
| 52 |                          |                                                                                        |       |
| 53 |                          |                                                                                        |       |
| 54 | Data access              | <a href="#">#29</a> Statement of who will have access to the final trial dataset, and  | 19    |
| 55 |                          | disclosure of contractual agreements that limit such access for                        |       |
| 56 |                          | investigators                                                                          |       |
| 57 |                          |                                                                                        |       |
| 58 |                          |                                                                                        |       |
| 59 |                          |                                                                                        |       |
| 60 |                          |                                                                                        |       |

|    |                          |                      |                                                                      |             |
|----|--------------------------|----------------------|----------------------------------------------------------------------|-------------|
| 1  | Ancillary and post trial | <a href="#">#30</a>  | Provisions, if any, for ancillary and post-trial care, and for       | 16          |
| 2  | care                     |                      | compensation to those who suffer harm from trial participation       |             |
| 3  |                          |                      |                                                                      |             |
| 4  |                          |                      |                                                                      |             |
| 5  | Dissemination policy:    | <a href="#">#31a</a> | Plans for investigators and sponsor to communicate trial results     | 20          |
| 6  | trial results            |                      | to participants, healthcare professionals, the public, and other     |             |
| 7  |                          |                      | relevant groups (eg, via publication, reporting in results           |             |
| 8  |                          |                      | databases, or other data sharing arrangements), including any        |             |
| 9  |                          |                      | publication restrictions                                             |             |
| 10 |                          |                      |                                                                      |             |
| 11 |                          |                      |                                                                      |             |
| 12 |                          |                      |                                                                      |             |
| 13 | Dissemination policy:    | <a href="#">#31b</a> | Authorship eligibility guidelines and any intended use of            | 19;20       |
| 14 | authorship               |                      | professional writers                                                 |             |
| 15 |                          |                      |                                                                      |             |
| 16 |                          |                      |                                                                      |             |
| 17 | Dissemination policy:    | <a href="#">#31c</a> | Plans, if any, for granting public access to the full protocol,      | 20          |
| 18 | reproducible research    |                      | participant-level dataset, and statistical code                      |             |
| 19 |                          |                      |                                                                      |             |
| 20 |                          |                      |                                                                      |             |
| 21 | <b>Appendices</b>        |                      |                                                                      |             |
| 22 |                          |                      |                                                                      |             |
| 23 | Informed consent         | <a href="#">#32</a>  | Model consent form and other related documentation given to          | 25;26;27;28 |
| 24 | materials                |                      | participants and authorised surrogates                               |             |
| 25 |                          |                      |                                                                      |             |
| 26 |                          |                      |                                                                      |             |
| 27 | Biological specimens     | <a href="#">#33</a>  | Plans for collection, laboratory evaluation, and storage of          | NA          |
| 28 |                          |                      | biological specimens for genetic or molecular analysis in the        |             |
| 29 |                          |                      | current trial and for future use in ancillary studies, if applicable |             |
| 30 |                          |                      |                                                                      |             |
| 31 |                          |                      |                                                                      |             |

#### Notes:

- 34
- 35 • 18a: 10;11;12;13
- 36
- 37 • 18b: 10;11;12;13
- 38
- 39 • 32: 25;26;27;28 The SPIRIT checklist is distributed under the terms of the Creative Commons Attribution
- 40 License CC-BY-ND 3.0. This checklist was completed on 24. July 2020 using
- 41 <https://www.goodreports.org/>, a tool made by the [EQUATOR Network](#) in collaboration with [Penelope.ai](#)
- 42
- 43
- 44
- 45
- 46
- 47
- 48
- 49
- 50
- 51
- 52
- 53
- 54
- 55
- 56
- 57
- 58
- 59

# BMJ Open

## Clinical Outcomes and Cost-Utility of Rotator Cuff Repair Surgery by Open and Arthroscopic Techniques: Study Protocol for a Randomized Clinical Trial.

|                                 |                                                                                                                                                                                                                                                                                                                                                                                                                                                                                                                                                                                                                                                                                                                                                                                        |
|---------------------------------|----------------------------------------------------------------------------------------------------------------------------------------------------------------------------------------------------------------------------------------------------------------------------------------------------------------------------------------------------------------------------------------------------------------------------------------------------------------------------------------------------------------------------------------------------------------------------------------------------------------------------------------------------------------------------------------------------------------------------------------------------------------------------------------|
| Journal:                        | <i>BMJ Open</i>                                                                                                                                                                                                                                                                                                                                                                                                                                                                                                                                                                                                                                                                                                                                                                        |
| Manuscript ID                   | bmjopen-2020-043126.R1                                                                                                                                                                                                                                                                                                                                                                                                                                                                                                                                                                                                                                                                                                                                                                 |
| Article Type:                   | Protocol                                                                                                                                                                                                                                                                                                                                                                                                                                                                                                                                                                                                                                                                                                                                                                               |
| Date Submitted by the Author:   | 15-Oct-2020                                                                                                                                                                                                                                                                                                                                                                                                                                                                                                                                                                                                                                                                                                                                                                            |
| Complete List of Authors:       | Pierami, Rafael; Hospital Israelita Albert Einstein, Sistema Locomotor; Grupo de Ombro e Cotovelo do Hospital Alvorara Moema, Departamento de Ortopedia<br>Lenza, Mario; Hospital Israelita Albert Einstein, Programa Locomotor<br>Antonioli, Eliane; Hospital Israelita Albert Einstein, Orthopaedic<br>Oliveira, Isadora; Hospital Israelita Albert Einstein, Sistema Locomotor<br>Castro, Isabela; Hospital Israelita Albert Einstein, Sistema Locomotor<br>Manente, Felipe; Hospital Israelita Albert Einstein, Sistema Locomotor<br>Fairbanks, Paula; Hospital Israelita Albert Einstein, Sistema Locomotor<br>Carrera, Eduardo; Hospital Israelita Albert Einstein, Departamento de Ortopedia<br>Matsumura, Bruno; Hospital Israelita Albert Einstein, Departamento de Ortopedia |
| <b>Primary Subject Heading</b>: | Health economics                                                                                                                                                                                                                                                                                                                                                                                                                                                                                                                                                                                                                                                                                                                                                                       |
| Secondary Subject Heading:      | Sports and exercise medicine                                                                                                                                                                                                                                                                                                                                                                                                                                                                                                                                                                                                                                                                                                                                                           |
| Keywords:                       | Adult orthopaedics < ORTHOPAEDIC & TRAUMA SURGERY, Elbow & shoulder < ORTHOPAEDIC & TRAUMA SURGERY, Musculoskeletal disorders < ORTHOPAEDIC & TRAUMA SURGERY, Shoulder < ORTHOPAEDIC & TRAUMA SURGERY, Orthopaedic sports trauma < ORTHOPAEDIC & TRAUMA SURGERY                                                                                                                                                                                                                                                                                                                                                                                                                                                                                                                        |
|                                 |                                                                                                                                                                                                                                                                                                                                                                                                                                                                                                                                                                                                                                                                                                                                                                                        |

SCHOLARONE™  
Manuscripts



I, the Submitting Author has the right to grant and does grant on behalf of all authors of the Work (as defined in the below author licence), an exclusive licence and/or a non-exclusive licence for contributions from authors who are: i) UK Crown employees; ii) where BMJ has agreed a CC-BY licence shall apply, and/or iii) in accordance with the terms applicable for US Federal Government officers or employees acting as part of their official duties; on a worldwide, perpetual, irrevocable, royalty-free basis to BMJ Publishing Group Ltd ("BMJ") its licensees and where the relevant Journal is co-owned by BMJ to the co-owners of the Journal, to publish the Work in this journal and any other BMJ products and to exploit all rights, as set out in our [licence](#).

The Submitting Author accepts and understands that any supply made under these terms is made by BMJ to the Submitting Author unless you are acting as an employee on behalf of your employer or a postgraduate student of an affiliated institution which is paying any applicable article publishing charge ("APC") for Open Access articles. Where the Submitting Author wishes to make the Work available on an Open Access basis (and intends to pay the relevant APC), the terms of reuse of such Open Access shall be governed by a Creative Commons licence – details of these licences and which [Creative Commons](#) licence will apply to this Work are set out in our licence referred to above.

Other than as permitted in any relevant BMJ Author's Self Archiving Policies, I confirm this Work has not been accepted for publication elsewhere, is not being considered for publication elsewhere and does not duplicate material already published. I confirm all authors consent to publication of this Work and authorise the granting of this licence.

1  
2  
3 1 **1. Title:** Clinical Outcomes and Cost-Utility of Rotator Cuff Repair Surgery by Open and  
4  
5 2 Arthroscopic Techniques: Study Protocol for a Randomized Clinical Trial  
6  
7

8 3 **1a. Short title:** Cost-utility of open and arthroscopic rotator cuff repair  
9

10  
11 4 **1b. Authors:** Rafael Pierami<sup>1</sup>, Eliane Antonioli<sup>2</sup>, Isadora Oliveira<sup>2</sup>, Isabela Queirós Castro<sup>2</sup>, Felipe  
12  
13 5 Manente<sup>3</sup>, Paula Fairbanks<sup>3</sup>, Eduardo da Frota Carrera<sup>1</sup>, Bruno Akio Matsumura<sup>1</sup>, Mário Lenza<sup>2</sup>  
14  
15

16 6 1. Centro de Excelência em Cirurgia de Ombro e Cotovelo, Hospital Alvorada Moema, São Paulo/SP, Brazil; 2. Hospital Israelita Albert Einstein, São  
17  
18 7 Paulo/SP, Brazil; 3. Faculdade de Medicina Albert Einstein, São Paulo/SP, Brazil  
19

20  
21  
22  
23 9 **1c. Corresponding Author:** Rafael Pierami (Hospital Israelita Albert Einstein, Programa  
24  
25 10 Locomotor; Avenida Albert Einstein, 627); e-mail: rafael\_pierami@hotmail.com  
26  
27

28 11 **1d. Authors e-mail:** Eliane Antonioli: [eliane.antonioli@einstein.br](mailto:eliane.antonioli@einstein.br); Isadora Oliveira:  
29  
30 12 [Isadora.odoliveira@einstein.br](mailto:Isadora.odoliveira@einstein.br); Isabela Queirós Castro: [isabela.castro@einstein.br](mailto:isabela.castro@einstein.br); Felipe  
31  
32 13 Manente: [fegmanente@gmail.com](mailto:fegmanente@gmail.com); Paula Fairbanks: [paulafairbanks@uol.com.br](mailto:paulafairbanks@uol.com.br); Eduardo da  
33  
34 14 Frota Carrera: [e.carrera@me.com](mailto:e.carrera@me.com); Bruno Akio Matsumura: [bru.akio@gmail.com](mailto:bru.akio@gmail.com)  
35  
36  
37

38 15 **1e. Trial Sponsor:** Fundação de Amparo à Pesquisa do Estado de São Paulo (FAPESP  
39  
40 16 2019/02159-3) R. Pio XI, 1500 - Alto da Lapa - CEP 05468-901 São Paulo/SP - Brasil  
41  
42 17 Tel: (+55) 11 3838-4000  
43  
44

45 18  
46  
47

48 19  
49  
50

51 20  
52  
53

54 21  
55  
56

## 22 2. Abstract

23 Introduction: Rotator cuff injuries account for up to 70% of pain in the shoulder. However,  
24 there is still no consensus on the best surgical treatment of patients with rotator cuff injuries,  
25 regarding the cost-effectiveness and cost-utility analysis between the open and arthroscopic  
26 methods of rotator cuff repair. The objective of this trial is to compare the efficacy, cost-  
27 effectiveness and cost-utility of open and arthroscopic procedure for rotator cuff repair.

28 Methods and Analysis: The trial is a two-group, parallel design, randomized controlled  
29 trial. A total of 100 patients with symptomatic rotator cuff lesion will be allocated in either open  
30 or arthroscopic technique in a 1:1 ratio, considering smoking (yes or no), lesion size (less than 3  
31 cm or more than 3 cm) and diabetes (present or absent) as stratification factors. All patients will  
32 be included in the same rehabilitation program after the intervention. The primary outcomes  
33 measure will be the Constant-Murley score and EuroQol 5-D-3L at 48 weeks post-surgery.  
34 Secondary outcomes include cost-effectiveness, cost-utility, pain, complications and clinical  
35 analysis, using the simple shoulder test (SST), Visual Analogue Pain Scale (VAS), integrity of the  
36 repair evaluated through magnetic resonance imaging, complications and failures of the proposed  
37 methods. For the cost-effectiveness analyses, we will use the VAS and the Constant-Murley Score  
38 as measures of effectiveness; for the cost-utility analyses, we will use the EuroQol- 5D-3L as a  
39 measure of utility in terms of incremental cost per quality-adjusted life-years (QALY).

40 Ethics and Dissemination: The study has been approved by the local Research Ethics  
41 Committee from both institutions: Hospital Israelita Albert Einstein and Hospital Alvorada  
42 Moema/ Hospital Pró-Cardíaco. The results will be published in a peer-review open access journal.

43 Trial Registration Number: NCT04146987

1  
2  
3 44 Keywords: rotator cuff; surgery; arthroscopy; open repair; cost-effectiveness; QALY  
4  
5

6 45 **Strengths and limitations of this study**  
7

- 8  
9 46 • This study is a prospective, randomized trial, that is the best design to address the study  
10  
11 47 question. Its methodological analyses is the best option to determine cost-utility and will  
12  
13 48 provide a strong evidence.  
14  
15  
16 49 • It will provide surgeons and healthcare providers with important information about the  
17  
18 50 surgical technique and the cost-effectiveness and cost-utility of these techniques  
19  
20  
21 51 • This study will provide important information about rotator cuff healing, what is still not  
22  
23 52 certain  
24  
25 53 • The lack of blinding of the patient and surgeons is a limitation to the study design  
26  
27  
28

29 54 **3. Introduction**  
30  
31  
32

33 55 **3a. Background and Rationale**  
34  
35

36 56 Musculoskeletal injuries are a major cost to the healthcare system. North American data  
37  
38 57 estimate that approximately 4.5 million patients annually seek medical attention due to shoulder  
39  
40 58 pain; of these, two million have some symptoms related to the rotator cuff. About 250,000 rotator  
41  
42 59 cuff repair surgeries are performed annually in the United States of America (US), and with the  
43  
44 60 continued increase in life expectancy and aging, there is a tendency to increase this  
45  
46 61 number[1][2][3]. An evaluation of the primary health care system in Cambridge, United Kingdom,  
47  
48 62 showed that the average frequency of shoulder pain was 9.5 per 1,000 individuals [4]. Of these,  
49  
50 63 86% had rotator cuff tendinopathy.  
51  
52  
53  
54  
55  
56  
57  
58  
59  
60

1  
2  
3 64 The rotator cuff is a group of four muscles and their tendons that act to stabilize the  
4  
5 65 shoulder and allow for its extensive range of motion. Four muscles and their attached tendons  
6  
7  
8 66 make up the rotator cuff: the subscapularis, supraspinatus, infraspinatus, and teres minor. The long  
9  
10 67 portion of the biceps tendon also contributes to cuff function, which is to stabilize the humeral  
11  
12 68 head in the glenoid cavity, preventing superior migration of the humeral head [5].  
13  
14

15 69 The possible lesions range from tendon degeneration (tendinosis/tendinopathy), through  
16  
17 70 partial tear (articular, interstitial or bursal), to complete tear. Its etiology is multifactorial and the  
18  
19 71 main factors associated with tears are tendon degeneration related to aging, trauma, tendon  
20  
21 72 insertion hypovascularity and genetic factors[6][7][8]. Since most lesions are caused by wear and  
22  
23 73 degeneration related to aging, people over 40 years are at great risk[3]. Diagnosis is made by  
24  
25 74 associating history and physical examination along with imaging methods, and magnetic  
26  
27 75 resonance imaging (MRI) is considered the method of choice [9]–[17].  
28  
29  
30  
31

32 76 Treatment of rotator cuff lesion depends on the type of tear, the patient's functional  
33  
34 77 capacity, age, and the presence of symptoms. In general, tendon degeneration and partial tears are  
35  
36 78 treated non-surgically, with physiotherapy, injections and analgesic medications. Complete and  
37  
38 79 incomplete tears that did not respond well to conservative treatment, however, might be treated  
40  
41 80 surgically [12], [18]–[20][3][21][22].  
42  
43

44 81 Among the surgical options, the open method is still considered the gold standard, with  
45  
46 82 good or excellent results in over 90% of cases [23]–[25]. Due to arthroscopy and the evolution of  
47  
48 83 arthroscopic instruments and implants in the last two decades, the arthroscopic repair technique  
49  
50 84 has gained space and is widely used. Some studies [23]–[26] did not show superiority of one  
51  
52 85 technique over another in terms of clinical outcomes. On the other hand, since the cost of  
53  
54  
55  
56  
57  
58  
59  
60



1  
2  
3 86 arthroscopic surgery is supposedly higher, due to the required equipment, it is important to  
4  
5 87 establish which option has the best cost-utility ratio. Other published studies suggested that the  
6  
7  
8 88 open method is superior than the arthroscopic method in relation to cost-utility [27]–[29]. To date,  
9  
10 89 no study in our country has assessed the comparison of the cost-utility of the two techniques;  
11  
12 90 considering that the open technique is being left behind, is important to determine if it remains a  
13  
14  
15 91 viable, reliable and cost-effective option for the treatment of rotator cuff tears.

### 17 92 **3b. Objectives**

19  
20  
21 93 Despite the high incidence of rotator cuff tears, there is no consensus about the best method  
22  
23 94 of repair, neither which method has the best cost-effectiveness and cost-utility ratio. Therefore, the  
24  
25 95 present study aims to compare the open and arthroscopic methods for rotator cuff repair and  
26  
27 96 determine which presents the best cost-effectiveness ratio.

### 29 30 97 **4. Trial Design**

31  
32  
33 98 The trial will be a prospective randomized controlled clinical trial.

### 35 36 99 **5. Methods**

37  
38  
39 100 This randomized controlled trial will follow the Consolidated Standards of Reporting Trials  
40  
41 101 (CONSORT) Statement [30]; also the protocol was developed following the SPIRIT  
42  
43 102 guidelines[31]. It will be performed at Hospital Alvorada Moema (Shoulder and Elbow Surgery  
44  
45 103 Center of Excellence), São Paulo, Brazil. The cost analysis will be performed by Hospital Israelita  
46  
47 104 Albert Einstein team, São Paulo, Brazil. The project was approved by both hospitals research ethics  
48  
49  
50  
51 105 committee and registered in [clinicaltrials.gov](http://clinicaltrials.gov).

### 106 **5a. Sample size**

107 The sample size estimate was obtained to detect differences between the open and  
108 arthroscopic repair groups in relation to the primary outcome of the study, Constant-Murley Score  
109 (CM) instrument after the intervention. Kukkone's et al. 2013 study [32] estimated the clinically  
110 important minimal difference in CM score in 10.4 points in patients with rotator cuff rupture after  
111 3 months of surgical treatment by the arthroscopic method. The estimated sample size of 45  
112 patients per group, total of 90 patients, would reach 90% power to detect a 10.4 difference between  
113 the groups in the CM instrument post-operative score with a standard deviation of up to 15 points  
114 with a significance level of 5% using a t-Student test. Predicting a loss of around 10% at 12 months  
115 of follow-up we aim to recruit 50 patients per group (PASS software [33]).

### 116 **5b. Inclusion criteria**

117 All patients eighteen years of age or older, presenting with complete rotator cuff tear or a  
118 partial rotator cuff tear of at least 50% of tendon thickness, with symptoms (pain and/or weakness),  
119 where conservative therapy failed will be included. The tendon tear will be confirmed by a  
120 Magnetic Resonance Imaging (MRI).

### 121 **5c. Exclusion criteria**

122 Patients with previous shoulder surgery, previous fractures in the affected shoulder, those  
123 with passive range of motion limitation (joint stiffness with an elevation of 90 degrees or less),  
124 radiographic signs of glenohumeral osteoarthritis or neurologic injury will be excluded. Patients  
125 will also be excluded if they do not wish to participate or are unable to understand or sign the

1  
2  
3 126 informed consent form (due to conditions such as cognitive impairment, or mental illness) or if  
4  
5 127 there are any medical conditions that contraindicate any of the surgical methods.  
6  
7  
8

#### 9 128 **5d. Randomization and allocation**

11  
12 129 After eligibility assessment, all patients will be informed about the nature and purpose of  
13  
14 130 the study and will only be included after agreeing with the study and signing the informed consent  
15  
16 131 form, that will be obtained by the surgeon that evaluated the patient and indicated the surgery.  
17  
18 132 Patients will be consecutively allocated to one of two proposed treatment methods: open rotator  
19  
20 133 cuff repair or arthroscopic rotator cuff repair. The software R was used to generate a randomization  
21  
22 134 list, considering 100 patients to be included in the study and the same probability of allocation for  
23  
24 135 both methods of surgery (open and arthroscopic repair). A stratified randomization will be  
25  
26 136 performed using the following variables (strata): smoking (yes or no), the size of the lesion ( $\leq 3$   
27  
28 137 cm or  $> 3$  cm) and diabetes (present or absent). Randomization will be performed by the REDCap  
29  
30 138 platform (Research Electronic Data Capture – Vanderbilt University)[34][35] after the patient is  
31  
32 139 anesthetized and prepared for the surgery. A person not associated with the study will open the  
33  
34 140 software and acquire one of the two techniques possible and tell the surgeon who will perform the  
35  
36 141 surgery.  
37  
38  
39  
40  
41  
42

#### 43 142 **5e. Recruitment**

44  
45 143 All patients that already would be treated by the shoulder surgeons at Hospital Alvorada  
46  
47 144 Moema (Shoulder and Elbow Surgery Center of Excellence), São Paulo, Brazil, will be enrolled  
48  
49 145 in this trial.  
50  
51  
52  
53  
54  
55  
56  
57  
58  
59  
60

## 146 **5f. Blinding**

147 Due to the type of interventions, neither participants nor treatment providers can be blinded  
148 to treatment allocation. The outcome assessment of the primary and secondary outcomes  
149 (Constant-Murley; EuroQol; VAS and SST), patient-reported outcomes, will not be blind. One of  
150 the authors (RP) will assess all other clinical outcomes. The statisticians conducting the analyses  
151 will be blinded to the treatment status until the analyses are completed.

## 152 **5g. Ethics and Dissemination**

153 This study was developed and will follow the International Conference Guideline for Good  
154 Clinical Practice (ICH GP) to assure that the data and results are credible and that the rights,  
155 integrity and confidentiality of the trial subjects are protected and respected[36][37].

156 All authors agreed to publish the results of the present study in a peer-reviewed open access  
157 journal, despite the results and conclusions found. All data will be available upon request.

## 158 **5h. Patient and Public Involvement**

159 The patients nor the public were involved on the design and development of this study.  
160 Their participation will first occur with the contact between the surgeon and patient, time which  
161 they will be informed about the study and will decide to participate or not. At this time, they will  
162 be informed about the purpose and importance of it. At all times during the follow-up the patients  
163 will be able to enquiry the researchers and surgeons about the project and to make suggestions and  
164 complaints about it.

165 All the outcomes measures will be self-reported. In case of doubts from the patients, they  
166 will be assisted by one member of the research team.

1  
2  
3 167 Since the authors agreed to publish the results of this research, patients will not be involved  
4  
5 168 on the dissemination. However, they will be encouraged to disseminate the knowledge among the  
6  
7  
8 169 community.  
9

## 10 11 170 **6. Intervention methods**

12  
13  
14 171 Five surgeons with at least four years of surgical technique experience will participate in  
15  
16 172 this study (EFC, MTCA, RP, BAM, VR). Also, the residents of shoulder and elbow surgery, as  
17  
18  
19 173 well as the residents of Orthopedics and Traumatology from Hospital Alvorada Moema and  
20  
21 174 residents in shoulder and elbow surgery at Albert Einstein Hospital may participate in surgeries.  
22

23  
24 175 Open surgery: patients will be positioned in a beach chair position with the affected limb  
25  
26 176 pending off the table, allowing manipulation and full range of motion. After standard patient  
27  
28  
29 177 preparation, an anterolateral incision will be made in the shoulder; the deltoid muscle belly will be  
30  
31 178 gently divided along its fibers until exposure of the subdeltoid / subacromial bursa, which will be  
32  
33 179 partially excised for exposure of the subacromial space and rotator cuff tendons. After mobilization  
34  
35  
36 180 and release of the ruptured tendons and debridement of the rotator cuff footprint, the tendon repair  
37  
38 181 to the bone will be performed using 5.5mm metal anchors (“Super Revo”-CONMED, USA),  
39  
40 182 according to the preference and technique chosen by the surgeon. In all cases, the release of the  
41  
42  
43 183 coracoacromial ligament and acromioplasty will be performed.  
44

45  
46 184 Arthroscopic Technique: the patients will be positioned in lateral decubitus position, with  
47  
48 185 the limb to be operated attached to a skin traction device, which through a traction post and 7  
49  
50 186 kilograms (kg), will maintain the shoulder in the following position: abduction of 30 to 60 degrees  
51  
52  
53 187 and flexion of 20 to 30 degrees. After standard patient preparation, a posterolateral incision will  
54  
55 188 be made in the shoulder for optic introduction, with a 50mmHg pressure pump and a 0.90 flow,  
56

1  
2  
3 189 and inspection of the glenohumeral joint. After establishment of all required arthroscopic portals,  
4  
5 190 joint inspection will be performed and any, if present, associated pathologies will be addressed.  
6  
7  
8 191 With the use of shaver blades, partial bursectomy will be performed and any adherence to the  
9  
10 192 tendon stumps will be released, as well as debridement of the rotator cuff footprint. The tendon  
11  
12 193 will then be reinserted to the bone using metallic 5.5mm anchors (“Super Revo”-CONMED,  
13  
14 194 USA), according to the preference of each surgeon. The technique used, as well as the suture  
15  
16 195 configuration and type of knot used, will be defined by the surgeon, according to his preference .  
17  
18  
19 196 After tendon repair, the coracoacromial ligament will be released, as well as acromioplasty will be  
20  
21  
22 197 performed.

## 23 24 198 **7. Postoperative rehabilitation**

25  
26  
27 199 All patients will undergo the same postoperative rehabilitation protocol: use of Velpeau  
28  
29 200 sling for 6 weeks; pendulum exercises from the second week; active movement and recovery of  
30  
31 201 the range of motion from the sixth week and strengthening from the twelfth week.  
32  
33  
34

35 202 The patients will be oriented to perform home exercises and, as well, to be assisted by a  
36  
37 203 physiotherapist twice a week from the sixth week of surgery and on. It is expected at the end of  
38  
39 204 treatment the need of about thirty sessions of physical therapy.  
40  
41  
42

## 43 205 **8. Outcomes assessment**

44  
45 206 Study data will be collected and managed using REDCap (Research Electronic Data  
46  
47 207 Capture- “Vanderbilt University, Nashville, Tennessee, USA”) hosted at Hospital Israelita Albert  
48  
49 208 Einstein [34][35]. REDCap is a secure, web-based software platform designed to support data  
50  
51 209 capture for research studies, providing: 1) an intuitive interface for validated data capture; 2) audit  
52  
53 210 trails for tracking data manipulation and export procedures; 3) automated export procedures for  
54  
55  
56

1  
2  
3 211 seamless data downloads to common statistical packages; and 4) procedures for data integration  
4  
5 212 and interoperability with external sources.  
6  
7

8 213 All study participants will be evaluated preoperatively, at the hospital discharge and 1, 2,  
9  
10 214 6, 24 and 48 weeks after the intervention. The Constant-Murley score, Visual Analogue Scale,  
11  
12 215 EuroQol-5D-3L and the Simple Shoulder Test questionnaires will be filled out by the patient and  
13  
14 216 assessed by evaluators to the assigned intervention. The endpoint of cost-utility analysis will be  
15  
16 217 48 weeks; clinical outcomes will also be assessed at 6 and 24 weeks.  
17  
18  
19

20 218 To prevent loss of follow-up all the patients will be monitored by REDCap software and  
21  
22 219 alerts will be sent to each patient near time points defined by the investigators. One week before  
23  
24 220 every medical consultation and at the twelfth week, regarding the rehabilitation process. If the  
25  
26 221 patient fails to fill any questionnaire or does not attend the medical consultations, he will be  
27  
28 222 contacted by phone and e-mail. If the patient became incommunicable, we will consider a lost  
29  
30 223 follow-up scenario, where, in accordance with the intention to treat principle, appropriate statistical  
31  
32 224 methods for data analysis, that consider unbalanced data and loss of follow-up, such as Generalized  
33  
34 225 Estimating Equation Model (GEE), will consider all patients observations, even if they fail in some  
35  
36 226 moment. Thereby, these patients will not be excluded, and all data will be considered.  
37  
38  
39  
40  
41

## 42 227 **9. Primary outcome**

43  
44

45 228 The Brazilian Portuguese Version of the Constant-Murley Score (CM) [38] will be  
46  
47 229 measured preoperatively at 6, 24 and 48 weeks after the intervention. Research assistants (not  
48  
49 230 blinded to the study aim) will ask the patients to fill in the validated CM form for the Portuguese  
50  
51 231 language and measure the range of motion with an analogic goniometer. The CM scale covers  
52  
53  
54  
55  
56  
57  
58  
59  
60

232 different domains of shoulder function (pain, activities of daily living, range of motion and power),  
233 punctuating each of them; it ranges from 0 to 100, with higher scores indicating better function[38].

234 EuroQol-5D-3L (European Quality of Life), a generic score developed to describe health-  
235 related quality of life [30] will also be assessed preoperatively, at 6, 24 and 48 weeks  
236 postoperatively. This score includes five health domains: mobility, self-care, usual activities,  
237 pain/discomfort, and anxiety/depression; each domain has 3 levels: no problem; some problems  
238 and extreme problems. In addition, the EuroQol-5D-3L has a visual analog scale where the  
239 participant assigns a value between 0 and 100 to his or her own health condition, where 100 means  
240 “the best imaginable health status” or “the best health state you can imagine” and 0 means “the  
241 worst imaginable health state” or “the worst health state you can imagine”. This is used to obtain  
242 a respondent’s stated preference values, not to record their own health state. [39]. At the end of  
243 its application, EuroQol-5D-3L will provide a unique numerical value that can be used for  
244 longitudinal comparison between different time periods.

## 245 **9b. Secondary outcomes**

246 Clinical outcomes will also be assessed by the Simple Shoulder Test (SST), validated for  
247 Portuguese [40], preoperatively and at 6, 24 and 48 weeks after the procedure. SST is a simple,  
248 quick and widely used questionnaire for shoulder function measurement; it consists of 12  
249 dichotomous questions answered by the patient himself. Each positive answer (yes) is given a  
250 score; at the end of the questionnaire the percentage of positive answers (score) is made, and the  
251 higher the percentage, the better the shoulder function. Other outcomes measured will be VAS  
252 (visual analogue pain scale) at hospital discharge, 1, 2, 6, 24 and 48 weeks after the intervention.  
253 This scale allows pain intensity to be measured with maximum interobserver reproducibility; it



1  
2  
3 254 consists of a 10 cm straight line with the ends determining the limits of pain sensation (no pain;  
4  
5 255 worst pain ever experienced); the distance between zero (no pain) and the patient's demarcation  
6  
7  
8 256 defines the intensity of pain[41].  
9

10  
11 257 Complications and failures of the proposed methods will also be assessed. Failures will be  
12  
13 258 characterized as the need for additional surgical procedures and/or change of the initially proposed  
14  
15 259 procedure. Patients who, for any reason, demonstrate treatment failure or require additional  
16  
17 260 interventions will be followed up and their results included in the group in which they were initially  
18  
19  
20 261 randomized, according to the intention to treat principle.  
21  
22

23 262 At the final follow-up (forty-eight weeks), the integrity and healing of repaired rotator cuff  
24  
25 263 will be assessed through Magnetic Resonance Imaging (MRI).  
26  
27

### 28 264 **9c. Cost-effectiveness**

29  
30

31 265 Cost-effectiveness and cost-utility analyses will be assessed by the estimate of direct and  
32  
33 266 indirect costs to the private healthcare system at 48 weeks. The perspective adopted in the study  
34  
35 267 will be the social costs, the direct and indirect medical costs. The set timeframe will be 48 weeks  
36  
37  
38 268 and a sensitivity analysis will be performed with the costs data, considering 0% to 5% discount  
39  
40 269 rate to define the optimal discount rate for the data, according to methodological Guidelines for  
41  
42 270 Economic Evaluation of Health Technologies – Brazilian Ministry of Health[42], [43][44]. The  
43  
44 271 costs included in direct medical costs will be: hospitalization, costs related to arthroscopic  
45  
46 272 instruments (e.g. cannulas, shaver blades, suture passer, ablator) medical fees, medication; the  
47  
48  
49 273 indirect costs: costs of absence from work, which will be estimated by the patient-reported number  
50  
51 274 of days away from work multiplied by the average wage rate of the current year. The costs will be  
52  
53  
54 275 converted from Brazilian Reais to US dollars and brought to the cost schedule of the current year,  
55  
56

276 in order to avoid that the effect of inflation on the medical inputs influences the analysis. For the  
 277 cost-effectiveness analyses, the VAS and the CM will be used as measures of effectiveness. For  
 278 the cost-utility analyses, the EuroQOL-5D-3L will be used as a measure of utility. The timetable  
 279 of outcomes assessment is described on Table 1.

280 **Table 1.** Timetable of assessment

| STUDY PERIOD                         |           |            |                 |    |    |    |           |     |
|--------------------------------------|-----------|------------|-----------------|----|----|----|-----------|-----|
|                                      | Enrolment | Allocation | Post-Allocation |    |    |    | Close-Out |     |
| TIMEPOINT                            | 0         | 0          | Surge<br>ry     | 1w | 2w | 6w | 24<br>w   | 48w |
| <b>ENROLMENT :</b>                   |           |            |                 |    |    |    |           |     |
| Eligibility                          | X         |            |                 |    |    |    |           |     |
| Screen                               | X         |            |                 |    |    |    |           |     |
| Informed<br>Consent                  | X         |            |                 |    |    |    |           |     |
| CM; EQ-5D, SST;<br>VAS<br>Allocation |           | X          |                 |    |    |    |           |     |
| <b>INTERVENTIONS</b>                 |           |            |                 |    |    |    |           |     |
| Open Repair                          |           |            | X               |    |    |    |           |     |
| Arthroscopic<br>Repair               |           |            | X               |    |    |    |           |     |
| <b>ASSESSMENTS :</b>                 |           |            |                 |    |    |    |           |     |
| CM; EQ-5D, SST;<br>VAS               |           |            |                 |    |    | X  | X         | X   |
| MRI                                  | X         |            |                 |    |    |    |           | X   |
| Complications                        |           |            | X               | X  | X  | X  | X         | X   |
| Economics                            |           |            | X               | X  | X  | X  | X         | X   |

1  
2  
3 281  
4  
56 282 **10. Data analysis**  
7  
8

9 283 The descriptive analyzes of variables will be based on the absolute frequencies and  
10  
11 284 percentages for categorical variables and summary measures as means and standard deviations or  
12  
13 285 medians and quartiles, as well as minimum and maximum values for numerical variables [45].  
14  
15  
16 286 Clinical scores will be represented by individual profile graphs separately by the surgical technique  
17  
18 287 group.

19  
20  
21 288 The groups will be compared according to the presence of categorical clinical outcomes  
22  
23 289 (failures, complications and healing integrity) by Chi-square or Fisher's exact tests, depending on  
24  
25  
26 290 the distribution observed after data collection.

27  
28  
29 291 For inferential analysis of continuous variables clinical outcomes, mixed models will be  
30  
31 292 used and, if the normal distribution is not adequate, generalized mixed models will be used [46].  
32  
33 293 The models will have time effects (preoperative, 6, 24 and 48 weeks after intervention), surgical  
34  
35 294 technique group (open repair or arthroscopic repair) and the interaction effect between time and  
36  
37  
38 295 group. The size of the lesion (smaller than three cm or larger than three cm) will also be included  
39  
40 296 in the models as a control variable, seeking to avoid possible biases.

41  
42  
43 297 The analyzes will be performed with the aid of the SPSS program (SPSS Inc., Chicago,  
44  
45 298 Illinois, USA) [47], considering a significance level of 5%.

46  
47  
48 299 **11. Safety**  
49

50  
51 300 There will be no benefit to the participant, beyond what is expected for the correction of  
52  
53 301 the rotator cuff tear, expecting an improvement of pain and function of the affected shoulder. The  
54  
55 302 risks of the present study are those inherent in any surgical treatment and anesthetic procedure,

1.

1  
2  
3 303 such as surgical wound infection, scar formation, pain, decrease in shoulder range of motion,  
4  
5 304 rotator cuff tear, neurovascular injury. If any complications occur, all patients will be treated by  
6  
7  
8 305 the same surgical team until the complication is healed.  
9

10  
11 306 Both surgical techniques have the same goal, that is, to repair the ruptured tendon to the  
12  
13 307 bone. The open technique requires a larger incision, as well as greater surgical dissection and  
14  
15 308 manipulation of the deltoid muscle, which may cause greater postoperative pain and weakness of  
16  
17 309 this muscle, in addition to causing a slightly larger scar. However, it provides great visualization  
18  
19  
20 310 and manipulation and mobilization capability of the ruptured tendon, which provides a safer and  
21  
22 311 tension-free repair.  
23  
24

25 312 The arthroscopic technique is performed with some point-shaped cuts in the shoulder,  
26  
27 313 usually three or four; due to smaller incisions, it requires less muscle manipulation, which  
28  
29  
30 314 theoretically would cause less postoperative pain and less muscle weakness of the deltoid muscle,  
31  
32 315 it also has minor scars. However, this technique requires more surgeon's experience and the  
33  
34 316 mobilization of the ruptured tendon(s) is limited. Using a large amount of saline may cause edema  
35  
36  
37 317 in the operated shoulder, which is usually resolved after the first 12 hours of surgery.  
38  
39

40 318 Finally, there is a minimal risk of loss of data confidentiality; all data will managed, stored  
41  
42 319 and protected by REDCAP software[34], [35]. One of the researchers will have access to all data  
43  
44 320 during the entire trial period. Any adverse event will be reported to the researchers involved and  
45  
46  
47 321 communicated to the main investigator according to the Institutional Review Boards description.  
48

## 49 322 **12. Discussion**

50  
51  
52 323 There is no consensus about the best cost-effectiveness of surgical treatment of patients  
53  
54  
55 324 with degenerative rotator cuff injuries. Several studies [27], [28], [48], [49] suggest that the open  
56  
57  
58  
59  
60

1  
2  
3 325 repair method is more cost-effective than the arthroscopic method, resulting in the same clinical  
4  
5 326 outcome with lower cost. Adla, Deepthi N. et. al [27] in a prospective nonrandomized study,  
6  
7 327 showed that both techniques lead to the same clinical outcomes. The costs of arthroscopic surgery  
8  
9 328 were higher than the open surgery, mainly due to the costs of the suture anchors, which was used  
10  
11 329 only in the arthroscopic group, is important to notice that in most of the open surgeries, the repair  
12  
13 330 was performed through transosseous sutures. Köse, Kamil Çağrı et. al [28], in a retrospective  
14  
15 331 study, also demonstrated similar clinical outcomes, although the costs of arthroscopic procedure  
16  
17 332 being much higher. Importantly, the open repair technique was performed using transosseous  
18  
19 333 sutures and the arthroscopic method using suture anchors and also, the open repair group required  
20  
21 334 longer length hospital stay. Hui, Yik Jing et. al [48] in a retrospective cohort study, described a  
22  
23 335 significantly higher cost for the arthroscopic procedure, compared to the open repair, evaluating  
24  
25 336 only the in-hospital costs, but with the same clinical outcomes. However, it is important to  
26  
27 337 emphasize that the open repair was performed using transosseous sutures, without suture anchors  
28  
29 338 and that the arthroscopic group needed a longer surgery time. Churchill, R.S. et. al [49] using the  
30  
31 339 New York Ambulatory Database System, with a total of 5,224 cuff repair surgeries, of which  
32  
33 340 1,334 open repair and 3,890 arthroscopic repair, showed that the mini-open rotator cuff repair costs  
34  
35 341 significantly less than the arthroscopic repair and requires significantly less surgical time.  
36  
37 342 However, no clinical outcomes have been analyzed in this study, making it impossible to determine  
38  
39 343 the cost-effectiveness ratio. An important study by Carr, A.J. et. al [50] carried out as a prospective  
40  
41 344 multicenter randomized clinical trial, concluded that there is no difference in the effectiveness and  
42  
43 345 cost-effectiveness between the open repair surgery and arthroscopic surgery after 24 months of  
44  
45 346 follow-up, even with the higher initial costs in the arthroscopy surgery. An economic evaluation  
46  
47 347 of the data from this study was carried out, showing that the Incremental Cost Effectiveness (ICER)  
48  
49  
50  
51  
52  
53  
54  
55  
56  
57  
58  
59  
60

348 was uncertain and the arthroscopic repair surgery was slightly more costly and less effective than  
349 open repair surgery.

350 Thus, despite the high incidence of rotator cuff tear, there is insufficient evidence to  
351 determine the best method for treating these injuries. So, the present study proposes to answer the  
352 clinical question of which method, open or arthroscopic, presents the best cost-utility in the  
353 surgical treatment of rotator cuff tear. Providing conclusive, good quality evidence for and  
354 contributing to the evidence base of methods used to treat rotator cuff injuries.

### 355 **13. Trial status**

356 Protocol Trial version: 4 Date: 10/06/2020

357 Recruitment Start Date: August/2020

358 Recruitment Estimated End Date: December/2021

359 Recruiting

### 360 **14. Additional files**

361 **Table 1.** Timetable of assessment

362 Informed Consent

### 363 **15. Abbreviations**

364 CONSORT: Consolidated standards of reporting trials; VAS: Visual analogue scale; MRI:  
365 magnetic resonance imaging; QALY: quality-adjusted life years; CM: Constant-Murley Score;  
366 SST: Simple Shoulder Test

## 367 **16. Declarations**

### 368 **16.1 Ethics Approval and Consent to Participate**

369 The study has been approved by the local Research Ethics Committee from both  
370 institutions: Hospital Israelita Albert Einstein (CAAE 19182619.3.1001.0071) and Hospital  
371 Alvorada Moema/ Hospital Pró-Cardíaco (CAAE 19182619.3.2002.5533). Digital, informed  
372 consent to participate will be obtained from all participants through software REDCAP[35][34].

373 All and any modifications in this study will be promptly reported to all Research Ethics  
374 Committee, all institutions, all investigators and all participants.

### 375 **16.2 Consent for Publication**

376 Not Applicable

### 377 **16.3 Availability of Data and Materials**

378 The datasets used and/or analyzed during the current study will be available from the  
379 corresponding author upon request.

### 380 **16.4 Competing interests**

381 The authors declare that they have no competing interests.

### 382 **16.5 Funding**

383 This study is supported by Fundação de Amparo à Pesquisa do Estado de São Paulo (FAPESP  
384 2019/02159-3).

## 385 **16.6 Registry**

386 The project is registered in the clinicaltrials.gov database (NCT04146987  
387 <https://clinicaltrials.gov/ct2/show/NCT04146987?term=NCT04146987&draw=2&rank=1>).

## 388 **16.7 Author contributions**

389 Mário Lenza (ML) is the Chief Investigator; he conceived the study, led the proposal and protocol  
390 development. He helped write the first draft of the manuscript and project grant (sponsor)

391 Rafael Pierami (RP) is the lead trial methodologist and helped in the study conceiving and  
392 development. He helped write the first draft of the manuscript and project grant (sponsor)

393 Eliane Antonioli (EA) contributed to study design and to development of the proposal. She He  
394 helped write the first draft of the manuscript and project grant (sponsor)

395 Isadora Oliveira (IO) contributes to study design related to QALY and cost-utility design. She also  
396 helped on the reviews and translation of the manuscript.

397 Isabel Queiros Castro (IQC) is responsible for cost analysis and cost-utility analysis. She also  
398 helped on the methodological development

399 Felipe Manente (FM) helped in the English translation and registration/publication of the trial. He  
400 also helped on the reviews and corrections of the manuscript.

401 Paula Fairbanks (PF) helped in the English translation and registration/publication of the trial. She  
402 also helped on the reviews and corrections of the manuscript.

403 Eduardo da Frota Carrera (EFC) helped in the study conceiving and development; he also helped  
404 on the manuscript corrections and reviews



1  
2  
3 405 Bruno Akio Matsumura (BAM) helped in the study conceiving and development; he also helped  
4  
5 406 on the manuscript corrections and reviews  
6  
7

8 407 All authors read and approved the final manuscript.  
9

## 10 11 408 **16.8 Acknowledgements** 12

13  
14 409 Not applicable  
15

## 16 17 410 **17. Dissemination policy** 18

19  
20 411 All the authors are committed and agree to publish the full results of the research, despite the final  
21  
22 412 results.  
23  
24

## 25 26 413 **18. Data Monitoring Committee (DMC)** 27

28 414 Since this trial have a short duration and both surgical techniques have known minimal risks, there  
29  
30 415 is no need for such committee.  
31  
32

## 33 34 416 **19. References** 35

- 36  
37 417 [1] R. C. M. Iii *et al.*, “The Societal and Economic Value of Rotator Cuff Repair,” pp. 1993–  
38  
39 418 2000, 2013.  
40  
41 419 [2] I. O. Kuye, N. B. Jain, L. Warner, J. H. Herndon, and J. J. P. Warner, “Economic evaluations  
42  
43 420 in shoulder pathologies: A systematic review of the literature,” *J. Shoulder Elb. Surg.*, 2012.  
44  
45 421 [3] American Academy of Orthopaedic Surgeons, “Management of Rotator Cuff Injuries  
46  
47 422 Clinical Practice Guideline,” *Orthoguidelines*, 2019.  
48  
49 423 [4] A. J. K. Ostör, C. A. Richards, A. T. Prevost, C. A. Speed, and B. L. Hazleman, “Diagnosis  
50  
51 424 and relation to general health of shoulder disorders presenting to primary care.,”  
52  
53  
54  
55  
56  
57  
58  
59  
60

- 1  
2  
3 425 *Rheumatology (Oxford)*., 2005.  
4  
5  
6 426 [5] L. Favard, G. Bacle, and J. Berhouet, “Rotator cuff repair.,” *Joint. Bone. Spine*, 2007.  
7  
8 427 [6] S. Gumina, S. Carbone, V. Campagna, V. Candela, F. M. Sacchetti, and G. Giannicola,  
9  
10 428 “The impact of aging on rotator cuff tear size,” *Musculoskelet. Surg.*, vol. 97, no. 1 SUPPL,  
11  
12 429 pp. 69–72, 2013.  
13  
14  
15 430 [7] L. Nové-Josserand, G. Walch, P. Adeleine, and P. Courpron, “Effect of age on the natural  
16  
17 431 history of the shoulder: a clinical and radiological study in the elderly,” *Rev. Chir. Orthop.*  
18  
19 432 *Reparatrice Appar. Mot.*., 2005.  
20  
21  
22 433 [8] K. Yamaguchi, A. M. Tetro, O. Blam, B. A. Evanoff, S. A. Teefey, and W. D. Middleton,  
23  
24 434 “Natural history of asymptomatic rotator cuff tears: A longitudinal analysis of  
25  
26 435 asymptomatic tears detected sonographically,” *J. Shoulder Elb. Surg.*, 2001.  
27  
28  
29 436 [9] C. Tempelaere *et al.*, “Dynamic Three-Dimensional Shoulder Mri during Active Motion for  
30  
31 437 Investigation of Rotator Cuff Diseases,” *PLoS One*, vol. 11, no. 7, p. e0158563, 2016.  
32  
33  
34 438 [10] Y. Sela *et al.*, “Rotator cuff tears: correlation between geometric tear patterns on MRI and  
35  
36 439 arthroscopy and pre- and postoperative clinical findings,” *Acta Radiol*, vol. 56, no. 2, pp.  
37  
38 440 182–189, 2015.  
39  
40  
41 441 [11] S. A. Teefey, D. A. Rubin, W. D. Middleton, C. F. Hildebolt, R. A. Leibold, and K.  
42  
43 442 Yamaguchi, “Detection and Quantification of Rotator Cuff Tears: Comparison of  
44  
45 443 Ultrasonographic, Magnetic Resonance Imaging, and Arthroscopic Findings in Seventy-  
46  
47 444 One Consecutive Cases,” *J. Bone Jt. Surg. - Ser. A*, 2004.  
48  
49  
50 445 [12] A. O. G. Jason E. Hsu Steven B. Lippitt, Frederick A. Matsen III, “Rockwood and Matsen’s  
51  
52 446 The Shoulder, 5th Edition: The Rotator Cuff,” in *Rockwood and Matsen’s The Shoulder,*  
53  
54 447 *5th Edition*, 5th ed., Elsevier, 2016, pp. 651–719.  
55  
56  
57  
58  
59  
60

- 1  
2  
3 448 [13] S. Yamakawa, H. Hashizume, N. Ichikawa, E. Itadera, and H. Inoue, "Comparative studies  
4  
5 449 of MRI and operative findings in rotator cuff tear," *Acta Med. Okayama*, 2001.  
6  
7  
8 450 [14] J. S. Roy *et al.*, "Diagnostic accuracy of ultrasonography, MRI and MR arthrography in the  
9  
10 451 characterisation of rotator cuff disorders: A systematic review and meta-analysis," *British*  
11  
12 452 *Journal of Sports Medicine*. 2015.  
13  
14  
15 453 [15] M. Lenza, R. Buchbinder, Y. Takwoingi, R. V. Johnston, N. C. A. Hanchard, and F.  
16  
17 454 Faloppa, "Magnetic resonance imaging, magnetic resonance arthrography and  
18  
19 455 ultrasonography for assessing rotator cuff tears in people with shoulder pain for whom  
20  
21 456 surgery is being considered," *Cochrane Database of Systematic Reviews*. 2013.  
22  
23  
24 457 [16] H. Handoll, N. Hanchard, M. Lenza, and R. Buchbinder, "Rotator cuff tears and shoulder  
25  
26 458 impingement: a tale of two diagnostic test accuracy reviews," *Cochrane Database Syst.*  
27  
28 459 *Rev.*, vol. 10, no. October, p. ED000068, 2013.  
29  
30  
31 460 [17] N. C. A. Hanchard, M. Lenza, H. H. G. Handoll, and Y. Takwoingi, "Physical tests for  
32  
33 461 shoulder impingements and local lesions of bursa, tendon or labrum that may accompany  
34  
35 462 impingement," *Cochrane Database of Systematic Reviews*. 2013.  
36  
37  
38 463 [18] J. C. Seida *et al.*, "Systematic review: Nonoperative and operative treatments for rotator  
39  
40 464 cuff tears," *Annals of Internal Medicine*. 2010.  
41  
42  
43 465 [19] R. Ainsworth and J. S. Lewis, "Exercise therapy for the conservative management of full  
44  
45 466 thickness tears of the rotator cuff: A systematic review," *British Journal of Sports Medicine*.  
46  
47 467 2007.  
48  
49 468 [20] W. Eljabu, H. M. Klinger, and M. von Knoch, "The natural history of rotator cuff tears: a  
50  
51 469 systematic review," *Arch. Orthop. Trauma Surg.*, 2015.  
52  
53  
54 470 [21] F. Oliva *et al.*, "I.S.Mu.L.T - Rotator cuff tears guidelines," *Muscles. Ligaments Tendons*

- 1  
2  
3 471 *J.*, vol. 5, no. 4, pp. 227–263, 2015.
- 4  
5 472 [22] G. Arce *et al.*, “Management of disorders of the rotator cuff: Proceedings of the ISAKOS  
6  
7  
8 473 upper extremity committee consensus meeting,” *Arthroscopy - Journal of Arthroscopic and*  
9  
10 474 *Related Surgery*. 2013.
- 11  
12 475 [23] P. Van Der Zwaal, B. J. W. Thomassen, M. J. Nieuwenhuijse, R. Lindenburg, J. W. A.  
13  
14 476 Swen, and E. R. A. Van Arkel, “Clinical outcome in all-arthroscopic versus mini-open  
15  
16 477 rotator cuff repair in small to medium-sized tears: A randomized controlled trial in 100  
17  
18 478 patients with 1-year follow-up,” *Arthrosc. - J. Arthrosc. Relat. Surg.*, vol. 29, no. 2, pp.  
19  
20 479 266–273, 2013.
- 21  
22 480 [24] K. Morse, A. D. Davis, R. Afra, E. Krall Kaye, A. Schepsis, and I. Voloshin, “Arthroscopic  
23  
24 481 versus mini-open rotator cuff repair: A comprehensive review and meta-analysis,” *Am. J.*  
25  
26 482 *Sports Med.*, 2008.
- 27  
28 483 [25] X. Ji, C. Bi, F. Wang, and Q. Wang, “Arthroscopic versus mini-open rotator cuff repair: An  
29  
30 484 up-to-date meta-analysis of randomized controlled trials,” *Arthrosc. - J. Arthrosc. Relat.*  
31  
32 485 *Surg.*, vol. 31, no. 1, pp. 118–124, 2015.
- 33  
34 486 [26] R. Huang, S. Wang, Y. Wang, X. Qin, and Y. Sun, “Systematic Review of All-Arthroscopic  
35  
36 487 Versus Mini-Open Repair of Rotator Cuff Tears: A Meta-Analysis,” *Scientific Reports*.  
37  
38 488 2016.
- 39  
40 489 [27] D. N. Adla, M. Rowsell, and R. Pandey, “Cost-effectiveness of open versus arthroscopic  
41  
42 490 rotator cuff repair,” *J. Shoulder Elb. Surg.*, 2010.
- 43  
44 491 [28] K. Ç. Köse *et al.*, “Mini-open versus all-arthroscopic rotator cuff repair: Comparison of the  
45  
46 492 operative costs and the clinical outcomes,” *Adv. Ther.*, 2008.
- 47  
48 493 [29] M. A. Vitale, M. G. Vitale, J. G. Zivin, J. P. Braman, L. U. Bigliani, and E. L. Flatow,

- 1  
2  
3 494 “Rotator cuff repair: An analysis of utility scores and cost-effectiveness,” *J. Shoulder Elb.*  
4  
5 495 *Surg.*, 2007.  
6  
7  
8 496 [30] G. D. Sanders *et al.*, “Recommendations for conduct, methodological practices, and  
9  
10 497 reporting of cost-effectiveness analyses: Second panel on cost-effectiveness in health and  
11  
12 498 medicine,” *JAMA - Journal of the American Medical Association*. 2016.  
13  
14  
15 499 [31] A. W. Chan *et al.*, “SPIRIT 2013 statement: Defining standard protocol items for clinical  
16  
17 500 trials,” *Annals of Internal Medicine*. 2013.  
18  
19 501 [32] J. Kukkonen, T. Kauko, T. Vahlberg, A. Joukainen, and V. Äärimaa, “Investigating minimal  
20  
21 502 clinically important difference for Constant score in patients undergoing rotator cuff  
22  
23 503 surgery,” *J. Shoulder Elb. Surg.*, 2013.  
24  
25  
26 504 [33] L. NCSS, “PASS 14 Power Analysis and Sample Size Software.” Kaysville, Utah, USA,  
27  
28 505 2015.  
29  
30  
31 506 [34] P. A. Harris, R. Taylor, R. Thielke, J. Payne, N. Gonzalez, and J. G. Conde, “Research  
32  
33 507 electronic data capture (REDCap)-A metadata-driven methodology and workflow process  
34  
35 508 for providing translational research informatics support,” *J. Biomed. Inform.*, 2009.  
36  
37  
38 509 [35] P. A. Harris *et al.*, “The REDCap consortium: Building an international community of  
39  
40 510 software platform partners,” *Journal of Biomedical Informatics*. 2019.  
41  
42 511 [36] A. Vijayanathan and O. Nawawi, “The importance of Good Clinical Practice guidelines  
43  
44 512 and its role in clinical trials,” *Biomedical Imaging and Intervention Journal*. 2008.  
45  
46  
47 513 [37] E. Englev and K. P. Petersen, “[ICH-GCP Guideline: quality assurance of clinical trials.  
48  
49 514 Status and perspectives].,” *Ugeskr. Laeger*, 2003.  
50  
51  
52 515 [38] R. P. G. Barreto, M. L. L. Barbosa, M. A. A. Balbinotti, F. C. Mothes, L. H. T. da Rosa,  
53  
54 516 and M. F. Silva, “Versão brasileira do Constant-Murley Score (CMS-BR): validade

- 1  
2  
3 517 convergente e de constructo, consistência interna e unidimensionalidade,” *Rev. Bras.*  
4  
5 518 *Ortop.*, vol. 51, no. 5, pp. 515–520, 2016.  
6  
7  
8 519 [39] F. Noronha, “Associação Portuguesa de Economia da Saúde Lara de Noronha e Ferreira,”  
9  
10 520 p. 46, 2002.  
11  
12 521 [40] J. O. B. Neto *et al.*, “Validation of the Simple Shoulder Test in a Portuguese-Brazilian  
13  
14 522 Population. Is the Latent Variable Structure and Validation of the Simple Shoulder Test  
15  
16 523 Stable across Cultures?,” *PLoS One*, vol. 8, no. 5, pp. 1–8, 2013.  
17  
18  
19 524 [41] D. A. Delgado *et al.*, “Validation of Digital Visual Analog Scale Pain Scoring With a  
20  
21 525 Traditional Paper-based Visual Analog Scale in Adults,” *JAAOS Glob. Res. Rev.*, 2018.  
22  
23  
24 526 [42] R. A. Ribeiro *et al.*, “Diretriz metodológica para estudos de avaliação econômica de  
25  
26 527 tecnologias em saúde no Brasil Methodological guidelines for economic evaluation studies  
27  
28 528 of health technologies in Brazil,” *J Bras Econ Saúde*, 2016.  
29  
30  
31 529 [43] R. A. Ribeiro *et al.*, “Methodological guidelines for economic evaluation studies of health  
32  
33 530 technologies in Brazil,” *J Bras Econ Saúde*, 2016.  
34  
35  
36 531 [44] J. E. Siegel, “Recommendations for reporting cost-effectiveness analyses. Panel on Cost-  
37  
38 532 Effectiveness in Health and Medicine,” *JAMA J. Am. Med. Assoc.*, vol. 276, no. 16, pp.  
39  
40 533 1339–1341, 1996.  
41  
42  
43 534 [45] J. Ludbrook, “PRACTICAL STATISTICS FOR MEDICAL RESEARCH,” *Australian and*  
44  
45 535 *New Zealand Journal of Surgery*. 1991.  
46  
47 536 [46] J. J. Faraway, *Extending the linear model with R: generalized linear, mixed effects and*  
48  
49 537 *nonparametric regression models*. 2006.  
50  
51  
52 538 [47] IBM Corp., “IBM SPSS Statistics for Windows, Version 24.0,” 2016. 2016.  
53  
54 539 [48] Y. J. Hui, A. Q. A. Teo, S. Sharma, B. H. M. Tan, and V. Prem Kumar, “Immediate costs

1  
2  
3 540 of mini-open versus arthroscopic rotator cuff repair in an Asian population,” *J. Orthop.*  
4  
5 541 *Surg.*, vol. 25, no. 1, pp. 1–6, 2017.

6  
7  
8 542 [49] R. S. Churchill and J. K. Ghorai, “Total cost and operating room time comparison of rotator  
9  
10 543 cuff repair techniques at low, intermediate, and high volume centers: Mini-open versus all-  
11  
12 544 arthroscopic,” *J. Shoulder Elb. Surg.*, 2010.

13  
14  
15 545 [50] A. J. Carr *et al.*, “Clinical effectiveness and cost-effectiveness of open and arthroscopic  
16  
17 546 rotator cuff repair [the UK rotator cuff surgery (UKUFF) randomised trial],” *Health*  
18  
19 547 *Technol. Assess. (Rockv)*., 2015.

20  
21 548

22  
23 549

24  
25 550

26  
27 551

28  
29 552

30  
31 553

32  
33 554 **TERMO DE CONSENTIMENTO LIVRE E ESCLARECIDO**

34  
35 555

36  
37  
38 556 ***Título do projeto:*** *Custo-Efetividade da Cirurgia de Reparo do Manguito Rotador Pelas Técnicas*  
39  
40  
41 557 *Aberta e Artroscópica. Ensaio Clínico Randomizado.*

42  
43 558 ***Pesquisadores responsáveis:*** *Mario Lenza e Rafael Pierami*

44  
45 559

46  
47 560 O(a) Sr(a) está sendo convidado para participar, como voluntário, de uma pesquisa científica. O Termo de  
48  
49 561 Consentimento Livre e Esclarecido tem por meta esclarecer esta pesquisa, explicando resumidamente seus  
50  
51 562 objetivos, procedimentos, riscos e benefícios. Após ser esclarecido sobre as informações a seguir, e aceitar fazer  
52  
53 563 parte do estudo, rubrique todas as páginas e assine ao final deste documento. Uma via será enviada para o(a) Sr(a)  
54  
55 564 por e-mail.

56  
57 565

1  
2  
3 566 **Objetivo do estudo:**

4  
5 567 O objetivo deste estudo é avaliar o custo-efetividade (relação da melhora clínica com os custos dos  
6 568 procedimentos) de dois tipos de cirurgias para o reparo do manguito rotador: cirurgia aberta e cirurgia artroscópica.

7 569  
8  
9 570 **Descrição do estudo:**

10  
11 571 A ruptura do manguito rotador, ou seja, o rompimento dos tendões do ombro é a principal causa de dor no  
12 572 ombro na população adulta, causando, além da dor, diminuição da força no ombro acometido e perda de qualidade  
13 573 de vida, devido a dor constante e piora na qualidade do sono causado pela dor. Existem duas técnicas cirúrgicas para  
14 574 correção desta doença: a técnica cirúrgica aberta, realizada por uma incisão (corte) no ombro e visualização direta  
15 575 do tendão rompido; e a técnica cirúrgica artroscópica, realizada através de pequenos cortes no ombro, por onde são  
16 576 introduzidos uma câmera de vídeo, para visualização do tendão rompido e instrumentais para realização da cirurgia.  
17 577 Ainda não há uma definição se há diferença entre os resultados obtidos e as técnicas cirúrgicas utilizadas. O(a) Sr(a)  
18 578 está sendo convidado para participar deste estudo pois há indicação de cirurgia para o reparo do manguito rotador.

19 579  
20  
21 580  
22  
23 581 **Procedimentos a serem realizados:**

24  
25 582 O estudo terá dois grupos de pacientes: grupo que fará a reconstrução do manguito via técnica cirúrgica  
26 583 aberta e o grupo que fará a reconstrução via técnica cirúrgica artroscópica. A seleção dos voluntários será feita de  
27 584 forma randomizada, isto é, não saberemos em que tipo de cirurgia cada indivíduo será incluído. A duração total da  
28 585 pesquisa será de um (01) ano e a participação do Sr(a) será em responder questionários sobre a sua saúde antes da  
29 586 cirurgia, comparecer às consultas médicas, antes da cirurgia e após 6, 24 e 48 semanas da cirurgia e realizar os  
30 587 exames de Ressonância magnética antes da cirurgia e após 48 semanas da cirurgia. Caso o(a) Sr(a) concorde em  
31 588 fazer parte deste estudo, os dados preenchidos e coletados serão utilizados para fins de pesquisa. Importante  
32 589 informar que os pacientes de ambos os tipos de cirurgia receberão os mesmos cuidados e os mesmos seguimentos  
33 590 e que não serão necessários exames de imagem ou laboratoriais adicionais àqueles rotineiramente utilizados para  
34 591 pacientes com lesão do manguito rotador. Como tratamento habitual após a cirurgia de lesão do manguito, o(a)  
35 592 Sr(a) será orientado a realizar um programa de reabilitação que inclui o uso de tipóia do tipo Velpeau por seis (06)  
36 593 semanas e um programa de exercícios pendulares orientados. Após, a tipóia será retirada e o(a) Sr(a) será orientado  
37 594 a realizar exercícios domésticos para ganho de movimento, além de duas sessões semanais de fisioterapia para  
38 595 analgesia e recuperação da amplitude de movimento do ombro. A partir da décima segunda semana (12ª) iniciarão  
39 596 os exercícios de fortalecimento muscular sob orientação de fisioterapeuta. No término do estudo será verificado se  
40 597 houve melhora na função do ombro, na qualidade de vida e na cicatrização do tendão reparado por meio de  
41 598 questionários de simples preenchimento e exame de ressonância magnética.

42 599  
43  
44 600  
45  
46 601 **Possíveis riscos e desconfortos:**

47  
48 602 Os riscos do presente estudo são aqueles inerentes a qualquer tratamento cirúrgico e procedimento  
49 603 anestésico, como infecção da ferida operatória, formação de cicatriz, dor, limitação do arco de movimento do  
50 604 ombro, rerruptura do manguito rotador, lesão neurovascular. A técnica cirúrgica aberta pode provocar maior dor  
51 605 pós-operatória e fraqueza muscular, além de causar uma cicatriz pouco maior. A técnica cirúrgica artroscópica pode  
52 606 causar menos dor pós-operatória e menos fraqueza muscular; além disso, apresenta cicatrizes menores, mas pode  
53 607 causar edema no ombro operado, o que geralmente é revertido após as primeiras 12 horas da cirurgia.

54 608  
55  
56  
57 2



1  
2  
3 609 **Benefícios para o participante:**

4  
5 610 O(a) Sr(a) não terá benefício além do esperado para a operação de correção da lesão, esperando-se melhora  
6 611 da dor e função do ombro operado, independente do tipo de técnica cirurgia utilizada. A sua participação ajudará a  
7 612 entender qual das técnicas cirúrgicas apresenta o melhor custo-efetividade para o tratamento de lesão do manguito  
8 613 rotador e permitirá apresentar à comunidade médica informações sobre a melhor indicação cirúrgica de tratamento.

9 614  
10  
11 615 **Direitos do participante:**

12  
13 616 Sua participação é voluntária e o(a) Sr(a) pode retirar seu consentimento ou ainda descontinuar sua  
14 617 participação em qualquer momento, se o assim o preferir, sem penalização e/ou prejuízo de qualquer natureza. Não  
15 618 haverá nenhum custo ao Sr(a) proveniente deste estudo, assim como não haverá qualquer tipo de remuneração  
16 619 pela sua participação.

17 620  
18  
19 621  
20  
21 622 Estou ciente que:

22  
23 623 1. As informações obtidas serão analisadas em conjunto com as de outros voluntários, não sendo divulgada  
24 624 a identificação de nenhum participante.

25 625  
26  
27 626 2. As informações produzidas neste estudo serão mantidas em lugar seguro, codificadas e a identificação  
28 627 só poderá ser realizada pela equipe do projeto.

29  
30 628  
31 629 4. Em qualquer etapa do estudo, você terá acesso aos profissionais responsáveis pela pesquisa para  
32 630 esclarecimento de eventuais dúvidas. O coordenador do projeto é o Dr. Mário Lenza e o principal responsável pelo  
33 631 estudo é o Dr. Rafael Pierami. Os pesquisadores podem ser encontrados nos seguintes endereços: Dr. Mario Lenza  
34 632 –Av. Albert Einstein, 627 – bloco A1 – 3º andar – Programa Locomotor, Morumbi, São Paulo – CEP 05652-900: Tel:  
35 633 (11) 2151.1444; e-mail: [mario.lenza@einstein.br](mailto:mario.lenza@einstein.br); e Dr. Rafael Pierami –Avenida Ministro Gabriel Rezende de Passos,  
36 634 550, 2º andar, Hospital Alvorada Moema – Centro de Excelência em Cirurgia de Ombro e Cotovelo, Moema, São  
37 635 Paulo – CEP 04521-022 – Tel: (11) 2186-9810 ou (11) 2186-9809; e-mail: [rafael.pierami@hotmail.com](mailto:rafael.pierami@hotmail.com).

38  
39 636  
40  
41 637 Se você tiver qualquer dúvida ética em relação à pesquisa, entre em contato com:

42 638 **Comitê de Ética em Pesquisa do Hospital Israelita Albert Einstein** - Av. Albert Einstein 627/701, São  
43 639 Paulo/SP, fone 2151-3729, e-mail: [cep@einstein.br](mailto:cep@einstein.br). Reclamações, elogios e sugestões deverão ser encaminhados  
44 640 ao Sistema de Atendimento ao Cliente (SAC) por meio do telefone (11) 2151-0222 ou formulário identificado como  
45 641 fale conosco disponível na página da pesquisa clínica ou pessoalmente.

46 642  
47  
48 643 **Comitê de Ética em Pesquisa em Seres Humanos do Hospital Pró-Cardíaco** (CEP/HPC) - Tel: (21) 3289-3802  
49 644 - Localizado na Rua Voluntários da Pátria, 435/8º andar – Botafogo, Rio de Janeiro/RJ, CEP: 22270-005. Horário de  
50 645 atendimento: de segunda à sexta-feira, das 09:00h às 16:00h.

51  
52 646  
53  
54 647 Confirmando que li o conteúdo deste Termo de Consentimento Livre e Esclarecido e aceitei participar  
55 648 voluntariamente deste estudo. Ficaram claros para mim quais são os propósitos do estudo, os procedimentos a

56  
57 2'

1  
2  
3 649 serem realizados, seus eventuais desconfortos e riscos, as garantias de confidencialidade e de esclarecimentos  
4 650 permanentes. Ficou claro também que minha participação é isenta de despesas e que tenho garantia do acesso a  
5 651 tratamento hospitalar quando necessário. Concordo voluntariamente em participar deste estudo, sabendo que  
6 652 poderei retirar o meu consentimento a qualquer momento, antes ou durante o mesmo, sem penalidades ou  
7 653 prejuízos ou perda de qualquer benefício que eu possa ter adquirido, ou no meu atendimento neste Serviço.  
8

9 654

10 655

11 656

12 657

13 658

Nome Completo do participante da pesquisa

14 659

15 660

16 661

Data: \_\_/\_\_/\_\_

17 662

Assinatura do participante da pesquisa

18 663

19 664

20 665

21 666

22 667

Nome completo e legível do pesquisador responsável

23 668

24 669

25 670

26 671

Data: \_\_/\_\_/\_\_

27 672

Assinatura do pesquisador responsável

28 673

29 674

1  
2  
3 6754  
5  
6 6767  
8 677**Nome completo do representante legal**9  
10  
11 67812  
13 67914  
15  
16 680

Data: \_\_\_/\_\_\_/\_\_\_

17  
18 681**Assinatura do representante legal**19  
20  
21 68222  
23  
24 68325  
26  
27 684

# Reporting checklist for protocol of a clinical trial.

Based on the SPIRIT guidelines.

**Title:** Cost-Utility of Rotator Cuff Repair Surgery by Open and Arthroscopic Techniques: Study Protocol for a Randomized Clinical Trial.

|                                                         |                     | Reporting Item                                                                                                                                                                                                                                                                           | Page Number |
|---------------------------------------------------------|---------------------|------------------------------------------------------------------------------------------------------------------------------------------------------------------------------------------------------------------------------------------------------------------------------------------|-------------|
| <b>Administrative information</b>                       |                     |                                                                                                                                                                                                                                                                                          |             |
| Title                                                   | <a href="#">#1</a>  | Descriptive title identifying the study design, population, interventions, and, if applicable, trial acronym                                                                                                                                                                             | 01          |
| Trial registration                                      | <a href="#">#2a</a> | Trial identifier and registry name. If not yet registered, name of intended registry                                                                                                                                                                                                     | 03          |
| Trial registration: data set                            | <a href="#">#2b</a> | All items from the World Health Organization Trial Registration Data Set                                                                                                                                                                                                                 | 05          |
| Protocol version                                        | <a href="#">#3</a>  | Date and version identifier                                                                                                                                                                                                                                                              | 17          |
| Funding                                                 | <a href="#">#4</a>  | Sources and types of financial, material, and other support                                                                                                                                                                                                                              | 18          |
| Roles and responsibilities: contributorship             | <a href="#">#5a</a> | Names, affiliations, and roles of protocol contributors                                                                                                                                                                                                                                  | 18;19       |
| Roles and responsibilities: sponsor contact information | <a href="#">#5b</a> | Name and contact information for the trial sponsor                                                                                                                                                                                                                                       | 01          |
| Roles and responsibilities: sponsor and funder          | <a href="#">#5c</a> | Role of study sponsor and funders, if any, in study design; collection, management, analysis, and interpretation of data; writing of the report; and the decision to submit the report for publication, including whether they will have ultimate authority over any of these activities | 06          |
| Roles and responsibilities:                             | <a href="#">#5d</a> | Composition, roles, and responsibilities of the coordinating centre, steering committee, endpoint adjudication committee,                                                                                                                                                                | 05          |

committees data management team, and other individuals or groups overseeing the trial, if applicable (see Item 21a for data monitoring committee)

## Introduction

Background and rationale [#6a](#) Description of research question and justification for undertaking the trial, including summary of relevant studies (published and unpublished) examining benefits and harms for each intervention 3;4;5

Background and rationale: choice of comparators [#6b](#) Explanation for choice of comparators 3;4;5

Objectives [#7](#) Specific objectives or hypotheses 5

Trial design [#8](#) Description of trial design including type of trial (eg, parallel group, crossover, factorial, single group), allocation ratio, and framework (eg, superiority, equivalence, non-inferiority, exploratory) 5

## Methods:

### Participants, interventions, and outcomes

Study setting [#9](#) Description of study settings (eg, community clinic, academic hospital) and list of countries where data will be collected. Reference to where list of study sites can be obtained 5;6

Eligibility criteria [#10](#) Inclusion and exclusion criteria for participants. If applicable, eligibility criteria for study centres and individuals who will perform the interventions (eg, surgeons, psychotherapists) 6;7

Interventions: description [#11a](#) Interventions for each group with sufficient detail to allow replication, including how and when they will be administered 8;9

Interventions: modifications [#11b](#) Criteria for discontinuing or modifying allocated interventions for a given trial participant (eg, drug dose change in response to harms, participant request, or improving / worsening disease) 12

Interventions: adherence [#11c](#) Strategies to improve adherence to intervention protocols, and any procedures for monitoring adherence (eg, drug tablet return; laboratory tests) 10;11

|    |                              |                      |                                                                  |          |
|----|------------------------------|----------------------|------------------------------------------------------------------|----------|
| 1  | Interventions:               | <a href="#">#11d</a> | Relevant concomitant care and interventions that are permitted   | NA       |
| 2  | concomitant care             |                      | or prohibited during the trial                                   |          |
| 3  |                              |                      |                                                                  |          |
| 4  |                              |                      |                                                                  |          |
| 5  | Outcomes                     | <a href="#">#12</a>  | Primary, secondary, and other outcomes, including the specific   | 10;11;12 |
| 6  |                              |                      | measurement variable (eg, systolic blood pressure), analysis     |          |
| 7  |                              |                      | metric (eg, change from baseline, final value, time to event),   |          |
| 8  |                              |                      | method of aggregation (eg, median, proportion), and time point   |          |
| 9  |                              |                      | for each outcome. Explanation of the clinical relevance of       |          |
| 10 |                              |                      | chosen efficacy and harm outcomes is strongly recommended        |          |
| 11 |                              |                      |                                                                  |          |
| 12 |                              |                      |                                                                  |          |
| 13 |                              |                      |                                                                  |          |
| 14 | Participant timeline         | <a href="#">#13</a>  | Time schedule of enrolment, interventions (including any run-    | 13       |
| 15 |                              |                      | ins and washouts), assessments, and visits for participants. A   |          |
| 16 |                              |                      | schematic diagram is highly recommended (see Figure)             |          |
| 17 |                              |                      |                                                                  |          |
| 18 |                              |                      |                                                                  |          |
| 19 |                              |                      |                                                                  |          |
| 20 | Sample size                  | <a href="#">#14</a>  | Estimated number of participants needed to achieve study         | 6        |
| 21 |                              |                      | objectives and how it was determined, including clinical and     |          |
| 22 |                              |                      | statistical assumptions supporting any sample size calculations  |          |
| 23 |                              |                      |                                                                  |          |
| 24 |                              |                      |                                                                  |          |
| 25 | Recruitment                  | <a href="#">#15</a>  | Strategies for achieving adequate participant enrolment to reach | 8        |
| 26 |                              |                      | target sample size                                               |          |
| 27 |                              |                      |                                                                  |          |
| 28 |                              |                      |                                                                  |          |
| 29 | <b>Methods: Assignment</b>   |                      |                                                                  |          |
| 30 | <b>of interventions (for</b> |                      |                                                                  |          |
| 31 | <b>controlled trials)</b>    |                      |                                                                  |          |
| 32 |                              |                      |                                                                  |          |
| 33 |                              |                      |                                                                  |          |
| 34 | Allocation: sequence         | <a href="#">#16a</a> | Method of generating the allocation sequence (eg, computer-      | 7;8      |
| 35 | generation                   |                      | generated random numbers), and list of any factors for           |          |
| 36 |                              |                      | stratification. To reduce predictability of a random sequence,   |          |
| 37 |                              |                      | details of any planned restriction (eg, blocking) should be      |          |
| 38 |                              |                      | provided in a separate document that is unavailable to those who |          |
| 39 |                              |                      | enrol participants or assign interventions                       |          |
| 40 |                              |                      |                                                                  |          |
| 41 |                              |                      |                                                                  |          |
| 42 |                              |                      |                                                                  |          |
| 43 |                              |                      |                                                                  |          |
| 44 | Allocation                   | <a href="#">#16b</a> | Mechanism of implementing the allocation sequence (eg, central   | 7;8      |
| 45 | concealment                  |                      | telephone; sequentially numbered, opaque, sealed envelopes),     |          |
| 46 | mechanism                    |                      | describing any steps to conceal the sequence until interventions |          |
| 47 |                              |                      | are assigned                                                     |          |
| 48 |                              |                      |                                                                  |          |
| 49 |                              |                      |                                                                  |          |
| 50 |                              |                      |                                                                  |          |
| 51 | Allocation:                  | <a href="#">#16c</a> | Who will generate the allocation sequence, who will enrol        | 7;8      |
| 52 | implementation               |                      | participants, and who will assign participants to interventions  |          |
| 53 |                              |                      |                                                                  |          |
| 54 |                              |                      |                                                                  |          |
| 55 | Blinding (masking)           | <a href="#">#17a</a> | Who will be blinded after assignment to interventions (eg, trial | 8        |
| 56 |                              |                      | participants, care providers, outcome assessors, data analysts), |          |
| 57 |                              |                      | and how                                                          |          |
| 58 |                              |                      |                                                                  |          |
| 59 |                              |                      |                                                                  |          |
| 60 |                              |                      |                                                                  |          |

|    |                            |                      |                                                                    |             |
|----|----------------------------|----------------------|--------------------------------------------------------------------|-------------|
| 1  | Blinding (masking):        | <a href="#">#17b</a> | If blinded, circumstances under which unblinding is permissible,   | 8           |
| 2  | emergency unblinding       |                      | and procedure for revealing a participant's allocated intervention |             |
| 3  |                            |                      | during the trial                                                   |             |
| 4  |                            |                      |                                                                    |             |
| 5  |                            |                      |                                                                    |             |
| 6  | <b>Methods: Data</b>       |                      |                                                                    |             |
| 7  | <b>collection,</b>         |                      |                                                                    |             |
| 8  | <b>management, and</b>     |                      |                                                                    |             |
| 9  | <b>analysis</b>            |                      |                                                                    |             |
| 10 |                            |                      |                                                                    |             |
| 11 |                            |                      |                                                                    |             |
| 12 |                            |                      |                                                                    |             |
| 13 | Data collection plan       | <a href="#">#18a</a> | Plans for assessment and collection of outcome, baseline, and      | 10;11;12;13 |
| 14 |                            |                      | other trial data, including any related processes to promote data  |             |
| 15 |                            |                      | quality (eg, duplicate measurements, training of assessors) and a  |             |
| 16 |                            |                      | description of study instruments (eg, questionnaires, laboratory   |             |
| 17 |                            |                      | tests) along with their reliability and validity, if known.        |             |
| 18 |                            |                      | Reference to where data collection forms can be found, if not in   |             |
| 19 |                            |                      | the protocol                                                       |             |
| 20 |                            |                      |                                                                    |             |
| 21 | Data collection plan:      | <a href="#">#18b</a> | Plans to promote participant retention and complete follow-up,     | 10;11;12;13 |
| 22 | retention                  |                      | including list of any outcome data to be collected for             |             |
| 23 |                            |                      | participants who discontinue or deviate from intervention          |             |
| 24 |                            |                      | protocols                                                          |             |
| 25 |                            |                      |                                                                    |             |
| 26 |                            |                      |                                                                    |             |
| 27 |                            |                      |                                                                    |             |
| 28 |                            |                      |                                                                    |             |
| 29 |                            |                      |                                                                    |             |
| 30 |                            |                      |                                                                    |             |
| 31 | Data management            | <a href="#">#19</a>  | Plans for data entry, coding, security, and storage, including any | 10;11       |
| 32 |                            |                      | related processes to promote data quality (eg, double data entry;  |             |
| 33 |                            |                      | range checks for data values). Reference to where details of data  |             |
| 34 |                            |                      | management procedures can be found, if not in the protocol         |             |
| 35 |                            |                      |                                                                    |             |
| 36 |                            |                      |                                                                    |             |
| 37 |                            |                      |                                                                    |             |
| 38 | Statistics: outcomes       | <a href="#">#20a</a> | Statistical methods for analysing primary and secondary            | 14          |
| 39 |                            |                      | outcomes. Reference to where other details of the statistical      |             |
| 40 |                            |                      | analysis plan can be found, if not in the protocol                 |             |
| 41 |                            |                      |                                                                    |             |
| 42 |                            |                      |                                                                    |             |
| 43 | Statistics: additional     | <a href="#">#20b</a> | Methods for any additional analyses (eg, subgroup and adjusted     | 14          |
| 44 | analyses                   |                      | analyses)                                                          |             |
| 45 |                            |                      |                                                                    |             |
| 46 |                            |                      |                                                                    |             |
| 47 | Statistics: analysis       | <a href="#">#20c</a> | Definition of analysis population relating to protocol non-        | 14          |
| 48 | population and missing     |                      | adherence (eg, as randomised analysis), and any statistical        |             |
| 49 | data                       |                      | methods to handle missing data (eg, multiple imputation)           |             |
| 50 |                            |                      |                                                                    |             |
| 51 |                            |                      |                                                                    |             |
| 52 | <b>Methods: Monitoring</b> |                      |                                                                    |             |
| 53 |                            |                      |                                                                    |             |
| 54 |                            |                      |                                                                    |             |
| 55 | Data monitoring:           | <a href="#">#21a</a> | Composition of data monitoring committee (DMC); summary of         | 20          |
| 56 | formal committee           |                      | its role and reporting structure; statement of whether it is       |             |
| 57 |                            |                      | independent from the sponsor and competing interests; and          |             |
| 58 |                            |                      |                                                                    |             |
| 59 |                            |                      |                                                                    |             |
| 60 |                            |                      |                                                                    |             |

|    |                          |                                                                                        |       |
|----|--------------------------|----------------------------------------------------------------------------------------|-------|
| 1  |                          | reference to where further details about its charter can be found,                     |       |
| 2  |                          | if not in the protocol. Alternatively, an explanation of why a                         |       |
| 3  |                          | DMC is not needed                                                                      |       |
| 4  |                          |                                                                                        |       |
| 5  | Data monitoring:         | <a href="#">#21b</a> Description of any interim analyses and stopping guidelines,      | 20    |
| 6  | interim analysis         | including who will have access to these interim results and make                       |       |
| 7  |                          | the final decision to terminate the trial                                              |       |
| 8  |                          |                                                                                        |       |
| 9  |                          |                                                                                        |       |
| 10 |                          |                                                                                        |       |
| 11 | Harms                    | <a href="#">#22</a> Plans for collecting, assessing, reporting, and managing solicited | 12    |
| 12 |                          | and spontaneously reported adverse events and other unintended                         |       |
| 13 |                          | effects of trial interventions or trial conduct                                        |       |
| 14 |                          |                                                                                        |       |
| 15 |                          |                                                                                        |       |
| 16 | Auditing                 | <a href="#">#23</a> Frequency and procedures for auditing trial conduct, if any, and   | NA    |
| 17 |                          | whether the process will be independent from investigators and                         |       |
| 18 |                          | the sponsor                                                                            |       |
| 19 |                          |                                                                                        |       |
| 20 |                          |                                                                                        |       |
| 21 | <b>Ethics and</b>        |                                                                                        |       |
| 22 | <b>dissemination</b>     |                                                                                        |       |
| 23 |                          |                                                                                        |       |
| 24 |                          |                                                                                        |       |
| 25 | Research ethics          | <a href="#">#24</a> Plans for seeking research ethics committee / institutional        | 5     |
| 26 | approval                 | review board (REC / IRB) approval                                                      |       |
| 27 |                          |                                                                                        |       |
| 28 |                          |                                                                                        |       |
| 29 | Protocol amendments      | <a href="#">#25</a> Plans for communicating important protocol modifications (eg,      | 6     |
| 30 |                          | changes to eligibility criteria, outcomes, analyses) to relevant                       |       |
| 31 |                          | parties (eg, investigators, REC / IRBs, trial participants, trial                      |       |
| 32 |                          | registries, journals, regulators)                                                      |       |
| 33 |                          |                                                                                        |       |
| 34 |                          |                                                                                        |       |
| 35 |                          |                                                                                        |       |
| 36 | Consent or assent        | <a href="#">#26a</a> Who will obtain informed consent or assent from potential trial   | 7     |
| 37 |                          | participants or authorised surrogates, and how (see Item 32)                           |       |
| 38 |                          |                                                                                        |       |
| 39 |                          |                                                                                        |       |
| 40 | Consent or assent:       | <a href="#">#26b</a> Additional consent provisions for collection and use of           | NA    |
| 41 | ancillary studies        | participant data and biological specimens in ancillary studies, if                     |       |
| 42 |                          | applicable                                                                             |       |
| 43 |                          |                                                                                        |       |
| 44 |                          |                                                                                        |       |
| 45 | Confidentiality          | <a href="#">#27</a> How personal information about potential and enrolled              | 10;12 |
| 46 |                          | participants will be collected, shared, and maintained in order to                     |       |
| 47 |                          | protect confidentiality before, during, and after the trial                            |       |
| 48 |                          |                                                                                        |       |
| 49 |                          |                                                                                        |       |
| 50 | Declaration of interests | <a href="#">#28</a> Financial and other competing interests for principal              | 19    |
| 51 |                          | investigators for the overall trial and each study site                                |       |
| 52 |                          |                                                                                        |       |
| 53 |                          |                                                                                        |       |
| 54 | Data access              | <a href="#">#29</a> Statement of who will have access to the final trial dataset, and  | 19    |
| 55 |                          | disclosure of contractual agreements that limit such access for                        |       |
| 56 |                          | investigators                                                                          |       |
| 57 |                          |                                                                                        |       |
| 58 |                          |                                                                                        |       |
| 59 |                          |                                                                                        |       |
| 60 |                          |                                                                                        |       |



|    |                          |                      |                                                                      |             |
|----|--------------------------|----------------------|----------------------------------------------------------------------|-------------|
| 1  | Ancillary and post trial | <a href="#">#30</a>  | Provisions, if any, for ancillary and post-trial care, and for       | 16          |
| 2  | care                     |                      | compensation to those who suffer harm from trial participation       |             |
| 3  |                          |                      |                                                                      |             |
| 4  |                          |                      |                                                                      |             |
| 5  | Dissemination policy:    | <a href="#">#31a</a> | Plans for investigators and sponsor to communicate trial results     | 20          |
| 6  | trial results            |                      | to participants, healthcare professionals, the public, and other     |             |
| 7  |                          |                      | relevant groups (eg, via publication, reporting in results           |             |
| 8  |                          |                      | databases, or other data sharing arrangements), including any        |             |
| 9  |                          |                      | publication restrictions                                             |             |
| 10 |                          |                      |                                                                      |             |
| 11 |                          |                      |                                                                      |             |
| 12 |                          |                      |                                                                      |             |
| 13 | Dissemination policy:    | <a href="#">#31b</a> | Authorship eligibility guidelines and any intended use of            | 19;20       |
| 14 | authorship               |                      | professional writers                                                 |             |
| 15 |                          |                      |                                                                      |             |
| 16 |                          |                      |                                                                      |             |
| 17 | Dissemination policy:    | <a href="#">#31c</a> | Plans, if any, for granting public access to the full protocol,      | 20          |
| 18 | reproducible research    |                      | participant-level dataset, and statistical code                      |             |
| 19 |                          |                      |                                                                      |             |
| 20 |                          |                      |                                                                      |             |
| 21 | <b>Appendices</b>        |                      |                                                                      |             |
| 22 |                          |                      |                                                                      |             |
| 23 | Informed consent         | <a href="#">#32</a>  | Model consent form and other related documentation given to          | 25;26;27;28 |
| 24 | materials                |                      | participants and authorised surrogates                               |             |
| 25 |                          |                      |                                                                      |             |
| 26 |                          |                      |                                                                      |             |
| 27 | Biological specimens     | <a href="#">#33</a>  | Plans for collection, laboratory evaluation, and storage of          | NA          |
| 28 |                          |                      | biological specimens for genetic or molecular analysis in the        |             |
| 29 |                          |                      | current trial and for future use in ancillary studies, if applicable |             |
| 30 |                          |                      |                                                                      |             |
| 31 |                          |                      |                                                                      |             |

#### Notes:

- 34
- 35 • 18a: 10;11;12;13
- 36
- 37 • 18b: 10;11;12;13
- 38
- 39 • 32: 25;26;27;28 The SPIRIT checklist is distributed under the terms of the Creative Commons Attribution
- 40 License CC-BY-ND 3.0. This checklist was completed on 24. July 2020 using
- 41 <https://www.goodreports.org/>, a tool made by the [EQUATOR Network](#) in collaboration with [Penelope.ai](#)
- 42
- 43
- 44
- 45
- 46
- 47
- 48
- 49
- 50
- 51
- 52
- 53
- 54
- 55
- 56
- 57
- 58
- 59

# BMJ Open

## Clinical Outcomes and Cost-Utility of Rotator Cuff Repair Surgery by Open and Arthroscopic Techniques: Study Protocol for a Randomized Clinical Trial.

|                                 |                                                                                                                                                                                                                                                                                                                                                                                                                                                                                                                                                                                                                                                                                                                                                                                        |
|---------------------------------|----------------------------------------------------------------------------------------------------------------------------------------------------------------------------------------------------------------------------------------------------------------------------------------------------------------------------------------------------------------------------------------------------------------------------------------------------------------------------------------------------------------------------------------------------------------------------------------------------------------------------------------------------------------------------------------------------------------------------------------------------------------------------------------|
| Journal:                        | <i>BMJ Open</i>                                                                                                                                                                                                                                                                                                                                                                                                                                                                                                                                                                                                                                                                                                                                                                        |
| Manuscript ID                   | bmjopen-2020-043126.R2                                                                                                                                                                                                                                                                                                                                                                                                                                                                                                                                                                                                                                                                                                                                                                 |
| Article Type:                   | Protocol                                                                                                                                                                                                                                                                                                                                                                                                                                                                                                                                                                                                                                                                                                                                                                               |
| Date Submitted by the Author:   | 30-Nov-2020                                                                                                                                                                                                                                                                                                                                                                                                                                                                                                                                                                                                                                                                                                                                                                            |
| Complete List of Authors:       | Pierami, Rafael; Hospital Israelita Albert Einstein, Sistema Locomotor; Grupo de Ombro e Cotovelo do Hospital Alvorara Moema, Departamento de Ortopedia<br>Antonioli, Eliane; Hospital Israelita Albert Einstein, Orthopaedic<br>Oliveira, Isadora; Hospital Israelita Albert Einstein, Sistema Locomotor<br>Castro, Isabela; Hospital Israelita Albert Einstein, Sistema Locomotor<br>Manente, Felipe; Hospital Israelita Albert Einstein, Sistema Locomotor<br>Fairbanks, Paula; Hospital Israelita Albert Einstein, Sistema Locomotor<br>Carrera, Eduardo; Hospital Israelita Albert Einstein, Departamento de Ortopedia<br>Matsumura, Bruno; Hospital Israelita Albert Einstein, Departamento de Ortopedia<br>Lenza, Mario; Hospital Israelita Albert Einstein, Programa Locomotor |
| <b>Primary Subject Heading</b>: | Health economics                                                                                                                                                                                                                                                                                                                                                                                                                                                                                                                                                                                                                                                                                                                                                                       |
| Secondary Subject Heading:      | Sports and exercise medicine, Surgery                                                                                                                                                                                                                                                                                                                                                                                                                                                                                                                                                                                                                                                                                                                                                  |
| Keywords:                       | Adult orthopaedics < ORTHOPAEDIC & TRAUMA SURGERY, Elbow & shoulder < ORTHOPAEDIC & TRAUMA SURGERY, Musculoskeletal disorders < ORTHOPAEDIC & TRAUMA SURGERY, Shoulder < ORTHOPAEDIC & TRAUMA SURGERY, Orthopaedic sports trauma < ORTHOPAEDIC & TRAUMA SURGERY                                                                                                                                                                                                                                                                                                                                                                                                                                                                                                                        |
|                                 |                                                                                                                                                                                                                                                                                                                                                                                                                                                                                                                                                                                                                                                                                                                                                                                        |

SCHOLARONE™  
Manuscripts



I, the Submitting Author has the right to grant and does grant on behalf of all authors of the Work (as defined in the below author licence), an exclusive licence and/or a non-exclusive licence for contributions from authors who are: i) UK Crown employees; ii) where BMJ has agreed a CC-BY licence shall apply, and/or iii) in accordance with the terms applicable for US Federal Government officers or employees acting as part of their official duties; on a worldwide, perpetual, irrevocable, royalty-free basis to BMJ Publishing Group Ltd ("BMJ") its licensees and where the relevant Journal is co-owned by BMJ to the co-owners of the Journal, to publish the Work in this journal and any other BMJ products and to exploit all rights, as set out in our [licence](#).

The Submitting Author accepts and understands that any supply made under these terms is made by BMJ to the Submitting Author unless you are acting as an employee on behalf of your employer or a postgraduate student of an affiliated institution which is paying any applicable article publishing charge ("APC") for Open Access articles. Where the Submitting Author wishes to make the Work available on an Open Access basis (and intends to pay the relevant APC), the terms of reuse of such Open Access shall be governed by a Creative Commons licence – details of these licences and which [Creative Commons](#) licence will apply to this Work are set out in our licence referred to above.

Other than as permitted in any relevant BMJ Author's Self Archiving Policies, I confirm this Work has not been accepted for publication elsewhere, is not being considered for publication elsewhere and does not duplicate material already published. I confirm all authors consent to publication of this Work and authorise the granting of this licence.

1  
2  
3 1 **1. Title:** Clinical Outcomes and Cost-Utility of Rotator Cuff Repair Surgery by Open and  
4  
5  
6 2 Arthroscopic Techniques: Study Protocol for a Randomized Clinical Trial

7  
8 3 **1a. Short title:** Cost-utility of open and arthroscopic rotator cuff repair

9  
10  
11 4 **1b. Authors:** Rafael Pierami<sup>1,2</sup>, Eliane Antonioli<sup>2</sup>, Isadora Oliveira<sup>2</sup>, Isabela Queirós Castro<sup>2</sup>,  
12  
13 5 Felipe Manente<sup>3</sup>, Paula Fairbanks<sup>3</sup>, Eduardo da Frota Carrera<sup>1,2</sup>, Bruno Akio Matsumura<sup>1,2</sup>, Mário  
14  
15 6 Lenza<sup>2</sup>

16  
17  
18 7 1. Hospital Alvorada Moema, São Paulo/SP, Brazil; 2. Hospital Israelita Albert Einstein, São Paulo/SP, Brazil; 3. Faculdade de Medicina Albert Einstein,  
19  
20 8 São Paulo/SP, Brazil

21  
22 9  
23  
24  
25 10 **1c. Corresponding Author:** Rafael Pierami (Hospital Israelita Albert Einstein, São Paulo, Brazil,  
26  
27 11 postal code 05652-900); e-mail: [rafael\\_pierami@hotmail.com](mailto:rafael_pierami@hotmail.com) or [rafael.pierami@einstein.br](mailto:rafael.pierami@einstein.br)

28  
29  
30 12 **1d. Authors e-mail:** Eliane Antonioli: [eliane.antonioli@einstein.br](mailto:eliane.antonioli@einstein.br); Isadora Oliveira:  
31  
32 13 [Isadora.odoliveira@einstein.br](mailto:Isadora.odoliveira@einstein.br); Isabela Queirós Castro: [isabela.castro@einstein.br](mailto:isabela.castro@einstein.br); Felipe  
33  
34 14 Manente: [fegmanente@gmail.com](mailto:fegmanente@gmail.com); Paula Fairbanks: [paulafairbanks@uol.com.br](mailto:paulafairbanks@uol.com.br); Eduardo da  
35  
36 15 Frota Carrera: [e.carrera@me.com](mailto:e.carrera@me.com); Bruno Akio Matsumura: [bru.akio@gmail.com](mailto:bru.akio@gmail.com)

37  
38  
39  
40 16 **1e. Trial Sponsor:** Fundação de Amparo à Pesquisa do Estado de São Paulo (FAPESP  
41  
42 17 2019/02159-3) R. Pio XI, 1500 - Alto da Lapa - CEP 05468-901 São Paulo/SP - Brasil  
43  
44 18 Tel: (+55) 11 3838-4000

45  
46  
47  
48 19  
49  
50  
51  
52 20

21

22

## 23 **2. Abstract**

24 Introduction: Rotator cuff injuries account for up to 70% of pain in the shoulder. However,  
25 there is still no consensus on the best surgical treatment of patients with rotator cuff injuries,  
26 regarding the cost-effectiveness and cost-utility analysis between the open and arthroscopic  
27 methods of rotator cuff repair. The objective of this trial is to compare the efficacy, cost-  
28 effectiveness and cost-utility of open and arthroscopic procedure for rotator cuff repair.

29 Methods and Analysis: The trial is a two-group, parallel design, randomized controlled  
30 trial. A total of 100 patients with symptomatic rotator cuff lesion will be allocated in either open  
31 or arthroscopic technique in a 1:1 ratio, considering smoking (yes or no), lesion size (less than 3  
32 cm or more than 3 cm) and diabetes (present or absent) as stratification factors. All patients will  
33 be included in the same rehabilitation program after the intervention. The primary outcomes  
34 measure will be the Constant-Murley score and EuroQol 5-D-3L at 48 weeks post-surgery.  
35 Secondary outcomes include cost-effectiveness, cost-utility, pain, complications and clinical  
36 analysis, using the simple shoulder test (SST), Visual Analogue Pain Scale (VAS), integrity of the  
37 repair evaluated through magnetic resonance imaging, complications and failures of the proposed  
38 methods. For the cost-effectiveness analyses, we will use the VAS and the Constant-Murley Score  
39 as measures of effectiveness; for the cost-utility analyses, we will use the EuroQol- 5D-3L as a  
40 measure of utility in terms of incremental cost per quality-adjusted life-years (QALY).

1  
2  
3 41 Ethics and Dissemination: The study has been approved by the local Research Ethics  
4  
5 42 Committee from both institutions: Hospital Israelita Albert Einstein and Hospital Alvorada  
6  
7 43 Moema/ Hospital Pró-Cardíaco. The results will be published in a peer-review open access journal.  
8  
9

10  
11 44 Trial Registration Number: NCT04146987  
12

13  
14 45 Keywords: rotator cuff; surgery; arthroscopy; open repair; cost-effectiveness; QALY  
15

### 16 17 46 **Strengths and limitations of this study**

- 18  
19  
20 47 • This study is a prospective, randomized trial, that is the best design to address the study  
21  
22 48 question. Its methodological analyses are the best option to determine cost-utility and will  
23  
24 49 provide a strong evidence.  
25  
26 50 • It will provide surgeons and healthcare providers with important information about the  
27  
28 51 surgical technique and the cost-effectiveness and cost-utility of these techniques  
29  
30 52 • This study will provide important information about rotator cuff healing and retear rates,  
31  
32 53 what is still unclear in the literature  
33  
34 54 • The lack of blinding of the patient and surgeons is a limitation to the study design  
35  
36  
37  
38  
39

## 40 55 **3. Introduction**

### 41 42 43 44 56 **3a. Background and Rationale**

45  
46  
47 57 Musculoskeletal injuries are a major cost to the healthcare system. North American data  
48  
49 58 estimate that approximately 4.5 million patients annually seek medical attention due to shoulder  
50  
51 59 pain; of these, two million have some symptoms related to the rotator cuff. About 250,000 rotator  
52  
53 60 cuff repair surgeries are performed annually in the United States of America (US), and with the  
54  
55  
56

1  
2  
3 61 continued increase in life expectancy and aging, there is a tendency to increase this  
4  
5 62 number[1][2][3]. An evaluation of the primary health care system in Cambridge, United Kingdom,  
6  
7 63 showed that the average frequency of shoulder pain was 9.5 per 1,000 individuals [4]. Of those,  
8  
9 64 86% had rotator cuff tendinopathy.

10  
11  
12  
13 65 The rotator cuff is a group of four muscles and their tendons that act to stabilize the  
14  
15 66 shoulder and allow for its extensive range of motion. Four muscles and their attached tendons  
16  
17 67 make up the rotator cuff: the subscapularis, supraspinatus, infraspinatus, and teres minor. The long  
18  
19 68 portion of the biceps tendon also contributes to cuff function, which is to stabilize the humeral  
20  
21 69 head in the glenoid cavity, preventing superior migration of the humeral head [5].  
22  
23  
24

25 70 The possible lesions range from tendon degeneration (tendinosis/tendinopathy), through  
26  
27 71 partial tear (articular, interstitial or bursal), to complete tear. Its etiology is multifactorial and the  
28  
29 72 main factors associated with tears are tendon degeneration related to aging, trauma, tendon  
30  
31 73 insertion hypovascularity and genetic factors[6][7][8]. Since most lesions are caused by wear and  
32  
33 74 degeneration related to aging, people over 40 years are at greater risk[3]. Diagnosis is made by  
34  
35 75 associating history and physical examination along with imaging methods, and magnetic  
36  
37 76 resonance imaging (MRI) is considered the method of choice [9]–[17].  
38  
39  
40  
41

42 77 Treatment of rotator cuff lesion depends on the type of tear, the patient's functional  
43  
44 78 capacity, age, and the presence of symptoms. In general, tendon degeneration and partial tears are  
45  
46 79 treated non-surgically, with physiotherapy, injections and analgesic medications. Complete and  
47  
48 80 incomplete tears that did not respond well to conservative treatment, however, might be treated  
49  
50 81 surgically [12], [18]–[20][3][21][22].  
51  
52  
53  
54  
55  
56  
57  
58  
59  
60

1  
2  
3 82 Among the surgical options, the open method is still considered the gold standard, with  
4  
5 83 good or excellent results in over 90% of cases [23]–[25]. Due to arthroscopy and the evolution of  
6  
7 84 arthroscopic instruments and implants in the last two decades, the arthroscopic repair technique  
8  
9  
10 85 has gained space and is widely used. Some studies [23]–[26] did not show superiority of one  
11  
12 86 technique over another in terms of clinical outcomes. On the other hand, since the cost of  
13  
14 87 arthroscopic surgery is supposedly higher, due to the required equipment, it is important to  
15  
16 88 establish which option has the best cost-utility ratio. Other published studies suggested that the  
17  
18 89 open method is superior than the arthroscopic method in relation to cost-utility [27]–[29]. To date,  
19  
20 90 no study in our country has assessed the comparison of the cost-utility of the two techniques;  
21  
22 91 considering that the open technique is being left behind, is important to determine if it remains a  
23  
24 92 viable, reliable and cost-effective option for the treatment of rotator cuff tears.  
25  
26  
27  
28

### 29 93 **3b. Objectives**

30  
31  
32 94 Despite the high incidence of rotator cuff tears, there is no consensus about the best method  
33  
34 95 of repair, neither which method has the best cost-effectiveness and cost-utility ratio. Therefore, the  
35  
36 96 present study aims to compare the open and arthroscopic methods for rotator cuff repair and  
37  
38 97 determine which presents the best cost-effectiveness ratio.  
39  
40  
41

### 42 98 **4. Trial Design**

43  
44  
45 99 The trial will be a prospective randomized controlled clinical trial.  
46  
47

### 48 100 **5. Methods**

49  
50  
51 101 This randomized controlled trial will follow the Consolidated Standards of Reporting Trials  
52  
53 102 (CONSORT) Statement [30]; also the protocol was developed following the SPIRIT  
54  
55  
56  
57  
58  
59  
60



1  
2  
3 103 guidelines[31]. It will be performed at Hospital Alvorada Moema (Shoulder and Elbow Surgery  
4  
5 104 Center of Excellence), São Paulo, Brazil. The cost analysis will be performed by Hospital Israelita  
6  
7  
8 105 Albert Einstein team, São Paulo, Brazil. The project was approved by both hospitals research ethics  
9  
10 106 committee and registered in clinicaltrials.gov.

### 14 107 **5a. Sample size**

16  
17 108 The sample size estimate was obtained to detect differences between the open and  
18  
19 109 arthroscopic repair groups in relation to the primary outcome of the study, Constant-Murley Score  
20  
21 110 (CM) instrument after the intervention. Kukkone's et al. 2013 study [32] estimated the clinically  
22  
23 111 important minimal difference in CM score in 10.4 points in patients with rotator cuff rupture after  
24  
25 112 3 months of surgical treatment by the arthroscopic method. The estimated sample size of 45  
26  
27 113 patients per group, total of 90 patients, would reach 90% power to detect a 10.4 difference between  
28  
29 114 the groups in the CM instrument post-operative score with a standard deviation of up to 15 points  
30  
31 115 with a significance level of 5% using a t-Student test. Predicting a loss of around 10% at 12 months  
32  
33 116 of follow-up we aim to recruit 50 patients per group (PASS software [33]).

### 39 117 **5b. Inclusion criteria**

41  
42 118 All patients eighteen years of age or older, presenting with complete rotator cuff tear or a  
43  
44 119 partial rotator cuff tear of at least 50% of tendon thickness, with symptoms (pain and/or weakness),  
45  
46 120 where conservative therapy failed will be included. The tendon tear will be confirmed by a  
47  
48 121 Magnetic Resonance Imaging (MRI).

### 122 **5c. Exclusion criteria**

123 Patients with previous shoulder surgery, previous fractures in the affected shoulder, those  
124 with passive range of motion limitation (joint stiffness with an elevation of 90 degrees or less),  
125 radiographic signs of glenohumeral osteoarthritis or neurologic injury will be excluded. Patients  
126 will also be excluded if they do not wish to participate or are unable to understand or sign the  
127 informed consent form (due to conditions such as cognitive impairment, or mental illness) or if  
128 there are any medical conditions that contraindicate any of the surgical methods.

### 129 **5d. Randomization and allocation**

130 After eligibility assessment, all patients will be informed about the nature and purpose of  
131 the study and will only be included after agreeing with the study and signing the informed consent  
132 form, that will be obtained by the surgeon that evaluated the patient and indicated the surgery.  
133 Patients will be consecutively allocated to one of two proposed treatment methods: open rotator  
134 cuff repair or arthroscopic rotator cuff repair. The software R was used to generate a randomization  
135 list, considering 100 patients to be included in the study and the same probability of allocation for  
136 both methods of surgery (open and arthroscopic repair). A stratified randomization will be  
137 performed using the following variables (strata): smoking (yes or no), the size of the lesion ( $\leq 3$   
138 cm or  $> 3$  cm) and diabetes (present or absent). Randomization will be performed by the REDCap  
139 platform (Research Electronic Data Capture – Vanderbilt University)[34][35] after the patient is  
140 anesthetized and prepared for the surgery. A person not associated with the study will open the  
141 software and acquire one of the two techniques possible and tell the surgeon who will perform the  
142 surgery.

### 143 **5e. Recruitment**

1  
2  
3 144 All patients that already would be treated by the shoulder surgeons at Hospital Alvorada  
4  
5 145 Moema (Shoulder and Elbow Surgery Center of Excellence), São Paulo, Brazil, will be enrolled  
6  
7  
8 146 in this trial.  
9

#### 11 147 **5f. Blinding**

12  
13  
14 148 Due to the type of interventions, neither participants nor treatment providers can be blinded  
15  
16  
17 149 to treatment allocation. The outcome assessment of the primary and secondary outcomes  
18  
19 150 (Constant-Murley; EuroQol; VAS and SST), patient-reported outcomes, will not be blind. One of  
20  
21 151 the authors (RP) will assess all other clinical outcomes. The statisticians conducting the analyses  
22  
23  
24 152 will be blinded to the treatment status until the analyses are completed.  
25

#### 26 153 **5g. Ethics and Dissemination**

27  
28  
29 154 The study has been approved by the local Research Ethics Committee from both  
30  
31  
32 155 institutions: Hospital Israelita Albert Einstein (CAAE 19182619.3.1001.0071) and Hospital  
33  
34 156 Alvorada Moema/ Hospital Pró-Cardíaco (CAAE 19182619.3.2002.5533). Digital, informed  
35  
36 157 consent (supplementary material) to participate will be obtained from all participants through  
37  
38  
39 158 software REDCAP[35][34].  
40

41  
42 159 This study was developed and will follow the International Conference Guideline for Good  
43  
44 160 Clinical Practice (ICH GP) to assure that the data and results are credible and that the rights,  
45  
46 161 integrity and confidentiality of the trial subjects are protected and respected[36][37].  
47  
48

49 162 All authors agreed to publish the results of the present study in a peer-reviewed open access  
50  
51 163 journal, despite the results and conclusions found. All data will be available upon request.  
52  
53

#### 54 164 **5h. Patient and Public Involvement**

1  
2  
3 165 The patients nor the public were involved on the design and development of this study.  
4  
5  
6 166 Their participation will first occur with the contact between the surgeon and patient, when they  
7  
8 167 will be informed about the study and will decide to participate or not. At that time, they will be  
9  
10 168 informed about the purpose and importance of it. During the entire follow-up the patients will be  
11  
12 169 able to enquiry the researchers and surgeons about the project and to make suggestions and  
13  
14  
15 170 complaints about it.

16  
17  
18 171 All the outcomes measures will be self-reported. The patients will be assisted by one  
19  
20 172 member of the research team, if they have any questions or doubts.

21  
22  
23 173 Since the authors agreed to publish the results of this research, patients will not be involved  
24  
25 174 on the dissemination. However, they will be encouraged to disseminate the knowledge among the  
26  
27 175 community.

## 30 31 176 **6. Intervention methods**

32  
33  
34 177 Five surgeons with at least four years of surgical technique experience will participate in  
35  
36 178 this study (EFC, MTCA, RP, BAM, VR). Also, the residents of shoulder and elbow surgery, as  
37  
38  
39 179 well as the residents of Orthopedics and Traumatology from Hospital Alvorada Moema and  
40  
41 180 residents in shoulder and elbow surgery at Albert Einstein Hospital may participate in surgeries.

42  
43  
44 181 Open surgery: patients will be positioned in a beach chair position with the affected limb  
45  
46 182 pending off the table, allowing manipulation and full range of motion. After standard patient  
47  
48  
49 183 preparation, an anterolateral incision will be made in the shoulder; the deltoid muscle belly will be  
50  
51 184 gently divided along its fibers until exposure of the subdeltoid / subacromial bursa, which will be  
52  
53 185 partially excised for exposure of the subacromial space and rotator cuff tendons. After mobilization

1  
2  
3 186 and release of the ruptured tendons and debridement of the rotator cuff footprint, the tendon repair  
4  
5 187 to the bone will be performed using 5.5mm metal anchors (“Super Revo”-CONMED, USA),  
6  
7  
8 188 according to the preference and technique chosen by the surgeon. In all cases, the release of the  
9  
10 189 coracoacromial ligament and acromioplasty will be performed.

13 190 Arthroscopic Technique: the patients will be positioned in lateral decubitus position, with  
14  
15 191 the limb to be operated attached to a skin traction device, which through a traction post and 7  
16  
17 192 kilograms (kg), will maintain the shoulder in the following position: abduction of 30 to 60 degrees  
18  
19 193 and flexion of 20 to 30 degrees. After standard patient preparation, a posterolateral incision will  
20  
21 194 be made in the shoulder for optic introduction, with a 50mmHg pressure pump and a 0.90 flow,  
22  
23 195 and inspection of the glenohumeral joint. After establishment of all required arthroscopic portals,  
24  
25 196 joint inspection will be performed and any, if present, associated pathologies will be addressed.  
26  
27 197 With the use of shaver blades, partial bursectomy will be performed and any adherence to the  
28  
29 198 tendon stumps will be released, as well as debridement of the rotator cuff footprint. The tendon  
30  
31 199 will then be reinserted to the bone using metallic 5.5mm anchors (“Super Revo”-CONMED,  
32  
33 200 USA), according to the preference of each surgeon. The technique used, as well as the suture  
34  
35 201 configuration and type of knot used, will be defined by the surgeon, according to his preference.  
36  
37 202 After tendon repair, the coracoacromial ligament will be released, as well as acromioplasty will be  
38  
39 203 performed.  
40  
41  
42  
43  
44  
45  
46

## 47 204 **7. Postoperative rehabilitation**

49  
50 205 All patients will undergo the same postoperative rehabilitation protocol: use of Velpeau  
51  
52 206 sling for 6 weeks; pendulum exercises starting on second week; active movement and recovery of  
53  
54 207 the range of motion from the sixth week and strengthening from the twelfth week.

1  
2  
3 208 The patients will be oriented to perform home exercises and to be assisted by a  
4  
5 209 physiotherapist twice a week from the sixth week of surgery and on. Approximately thirty sessions  
6  
7  
8 210 of physical therapy will be expected.  
9

## 10 211 **8. Outcomes assessment**

11  
12  
13 212 Study data will be collected and managed using REDCap (Research Electronic Data  
14  
15  
16 213 Capture- “Vanderbilt University, Nashville, Tennessee, USA”) hosted at Hospital Israelita Albert  
17  
18 214 Einstein [34][35]. REDCap is a secure, web-based software platform designed to support data  
19  
20  
21 215 capture for research studies, providing: 1) an intuitive interface for validated data capture; 2) audit  
22  
23 216 trails for tracking data manipulation and export procedures; 3) automated export procedures for  
24  
25 217 seamless data downloads to common statistical packages; and 4) procedures for data integration  
26  
27 218 and interoperability with external sources.  
28  
29

30 219 All study participants will be evaluated preoperatively, at the hospital discharge and 1, 2,  
31  
32 220 6, 24 and 48 weeks after the intervention. The Constant-Murley score, Visual Analogue Scale,  
33  
34 221 EuroQol-5D-3L and the Simple Shoulder Test questionnaires will be filled out by the patient and  
35  
36  
37 222 assessed by evaluators to the assigned intervention. The endpoint of cost-utility analysis will be  
38  
39 223 48 weeks; clinical outcomes will also be assessed at 6 and 24 weeks.  
40  
41  
42

43 224 To prevent loss of follow-up all the patients will be monitored by REDCap software and  
44  
45 225 alerts will be sent to each patient near time points defined by the investigators. One week before  
46  
47 226 every medical consultation and at the twelfth week, during the rehabilitation process. If the patient  
48  
49 227 fails to fill any questionnaire or does not attend the medical consultations, he will be contacted by  
50  
51 228 phone and e-mail. If a patient becomes not reachable at any time of the follow-up, we will consider  
52  
53 229 a lost follow-up scenario, where, in accordance with the intention to treat principle, appropriate  
54  
55  
56

1  
2  
3 230 statistical methods for data analysis, that consider unbalanced data and loss of follow-up, such as  
4  
5 231 Generalized Estimating Equation Model (GEE), will consider all patients observations, even if  
6  
7  
8 232 they fail in some moment. Thereby, these patients will not be excluded, and all data will be  
9  
10 233 considered.

## 13 234 **9. Primary outcome**

16 235 The Brazilian Portuguese Version of the Constant-Murley Score (CM) [38] will be  
17  
18 236 measured preoperatively at 6, 24 and 48 weeks after the intervention. Research assistants (not  
19  
20 237 blinded to the study aim) will ask the patients to fill in the validated CM form in Portuguese and  
21  
22 238 measure the range of motion with an analogic goniometer. The CM scale covers different domains  
23  
24 239 of shoulder function (pain, activities of daily living, range of motion and power), punctuating each  
25  
26 240 of them; it ranges from 0 to 100, with higher scores indicating better function[38]. The constant-  
27  
28 241 Murley score is one of the most commonly used scores on shoulder scoring system and is considered the  
29  
30 242 gold-standard in Europe[39][40]. It is reliable for detection of shoulder improvement after surgical  
31  
32 243 procedures and its strong correlation with shoulder specific diseases, especially rotator cuff, and reliability  
33  
34 244 makes it a good score system for a clinical research.

39 245 EuroQol-5D-3L (European Quality of Life), a generic score developed to describe health-  
40  
41 246 related quality of life [30] will also be assessed preoperatively, at 6, 24 and 48 weeks  
42  
43 247 postoperatively. This score includes five health domains: mobility, self-care, usual activities,  
44  
45 248 pain/discomfort, and anxiety/depression; each domain has 3 levels: no problem; some problems  
46  
47 249 and extreme problems. In addition, the EuroQol-5D-3L has a visual analog scale where the  
48  
49 250 participant assigns a value between 0 and 100 to his or her own health condition, where 100 means  
50  
51 251 “the best imaginable health status” or “the best health state you can imagine” and 0 means “the  
52  
53 252 worst imaginable health state” or “the worst health state you can imagine”. This is used to obtain  
54  
55  
56

1

1  
2  
3 253 a respondent's stated preference values, not to record their own health state. [41]. At the end of  
4  
5 254 its application, EuroQol-5D-3L will provide a unique numerical value that can be used for  
6  
7  
8 255 longitudinal comparison between different time periods.  
9

## 10 256 **9b. Secondary outcomes**

11  
12  
13  
14 257 Clinical outcomes will also be assessed by the Simple Shoulder Test (SST), validated for  
15  
16 258 Portuguese [42], preoperatively and at 6, 24 and 48 weeks after the procedure. SST is a simple,  
17  
18 259 quick and widely used questionnaire for shoulder function measurement; it consists of 12  
19  
20  
21 260 dichotomous questions answered by the patient himself. Each positive answer (yes) is given a  
22  
23 261 score; at the end of the questionnaire the percentage of positive answers (score) is made, and the  
24  
25 262 higher the percentage, the better the shoulder function. Other outcomes measured will be VAS  
26  
27 263 (visual analogue pain scale) at hospital discharge, 1, 2, 6, 24 and 48 weeks after the intervention.  
28  
29  
30 264 This scale allows pain intensity to be measured with maximum interobserver reproducibility; it  
31  
32 265 consists of a 10 cm straight line with the ends determining the limits of pain sensation (no pain;  
33  
34 266 worst pain ever experienced); the distance between zero (no pain) and the patient's demarcation  
35  
36  
37 267 defines the intensity of pain[43].  
38

39  
40 268 Complications and failures of the proposed methods will also be assessed. Failures will be  
41  
42 269 characterized as the need for additional surgical procedures and/or change of the initially proposed  
43  
44 270 procedure. Patients who, for any reason, demonstrate treatment failure or require additional  
45  
46  
47 271 interventions will be followed up and their results included in the group in which they were initially  
48  
49 272 randomized, according to the intention to treat principle.  
50

51  
52 273 At the final follow-up (forty-eight weeks), the integrity and healing of repaired rotator cuff  
53  
54 274 will be assessed through Magnetic Resonance Imaging (MRI).  
55  
56



### 275 **9c. Cost-effectiveness**

276 Cost-effectiveness and cost-utility analyses will be assessed by the estimate of direct and  
 277 indirect costs to the private healthcare system at 48 weeks. The perspective adopted in the study  
 278 will be the social costs, the direct and indirect medical costs. The set timeframe will be 48 weeks  
 279 and a sensitivity analysis will be performed with the costs data, considering 0% to 5% discount  
 280 rate to define the optimal discount rate for the data, according to methodological Guidelines for  
 281 Economic Evaluation of Health Technologies – Brazilian Ministry of Health[44], [45][46]. The  
 282 costs included in direct medical costs will be: hospitalization, costs related to arthroscopic  
 283 instruments (e.g. cannulas, shaver blades, suture passer, ablator) medical fees, medication; the  
 284 indirect costs: costs of absence from work, which will be estimated by the patient-reported number  
 285 of days away from work multiplied by the average wage rate of the current year. The costs will be  
 286 converted from Brazilian Reais to US dollars and brought to the cost schedule of the current year,  
 287 in order to avoid that the effect of inflation on the medical inputs influences the analysis. For the  
 288 cost-effectiveness analysis, the VAS and the CM will be used as measures of effectiveness. For  
 289 the cost-utility analysis, the EuroQOL-5D-3L will be used as a measure of utility. The timetable  
 290 of outcomes assessment is described on Table 1.

291 **Table1.** Timetable of assessment

| STUDY PERIOD |           |            |                 |        |        |        |               |     |
|--------------|-----------|------------|-----------------|--------|--------|--------|---------------|-----|
|              | Enrolment | Allocation | Post-Allocation |        |        |        | Close<br>-Out |     |
| TIMEPOINT    | 0         | 0          | Surger<br>y     | 1<br>w | 2<br>w | 6<br>w | 24<br>w       | 48w |

1.

|                      |   |   |   |   |   |   |   |   |
|----------------------|---|---|---|---|---|---|---|---|
| <b>ENROLMENT:</b>    |   |   |   |   |   |   |   |   |
| Eligibility Screen   | X |   |   |   |   |   |   |   |
| Informed Consent     | X |   |   |   |   |   |   |   |
| CM; EQ-5D, SST;      | X |   |   |   |   |   |   |   |
| VAS                  | X |   |   |   |   |   |   |   |
| Allocation           |   | X |   |   |   |   |   |   |
| <b>INTERVENTIONS</b> |   |   |   |   |   |   |   |   |
| Open Repair          |   |   | X |   |   |   |   |   |
| Arthroscopic Repair  |   |   | X |   |   |   |   |   |
| <b>ASSESSMENTS:</b>  |   |   |   |   |   |   |   |   |
| CM; EQ-5D, SST;      |   |   |   |   |   | X | X | X |
| VAS                  |   |   | X | X | X | X | X | X |
| MRI                  | X |   |   |   |   |   |   | X |
| Complications        |   |   | X | X | X | X | X | X |
| Economics            |   |   | X | X | X | X | X | X |

292

## 293 10. Data analysis

294 The descriptive analyses of variables will be based on the absolute frequencies and  
 295 percentages for categorical variables and summary measures as means and standard deviations or  
 296 medians and quartiles, as well as minimum and maximum values for numerical variables [47].

1.

1  
2  
3 297 Clinical scores will be represented by individual profile graphs separately by the surgical technique  
4  
5 298 group.

6  
7  
8 299 The groups will be compared according to the presence of categorical clinical outcomes  
9  
10 300 (failures, complications and healing integrity) by Chi-square or Fisher's exact tests, depending on  
11  
12 301 the distribution observed after data collection.

13  
14  
15 302 For inferential analysis of continuous variables clinical outcomes, mixed models will be  
16  
17 303 used and, if the normal distribution is not adequate, generalized mixed models will be used [48].  
18  
19 304 The models will have time effects (preoperative, 6, 24 and 48 weeks after intervention), surgical  
20  
21 305 technique group (open repair or arthroscopic repair) and the interaction effect between time and  
22  
23 306 group. The size of the lesion (smaller than three cm or larger than three cm) will also be included  
24  
25 307 in the models as a control variable, seeking to avoid possible biases.

26  
27  
28 308 The analyzes will be performed with the aid of the SPSS program (SPSS Inc., Chicago,  
29  
30 309 Illinois, USA) [49], considering a significance level of 5%.

## 31 310 **11. Safety**

32  
33  
34  
35  
36  
37  
38 311 There will be no benefit to the participant, beyond what is expected for the correction of  
39  
40 312 the rotator cuff tear, expecting an improvement of pain and function of the affected shoulder. The  
41  
42 313 risks of the present study are those inherent in any surgical treatment and anesthetic procedure,  
43  
44 314 such as surgical wound infection, scar formation, pain, decrease in shoulder range of motion,  
45  
46 315 rotator cuff tear, neurovascular injury. If any complications occur, all patients will be treated by  
47  
48 316 the same surgical team until the complication is healed.

49  
50  
51  
52 317 Both surgical techniques have the same goal, that is, to repair the ruptured tendon to the  
53  
54 318 bone. The open technique requires a larger incision, as well as greater surgical dissection and

1  
2  
3 319 manipulation of the deltoid muscle, which may cause greater postoperative pain and weakness of  
4  
5 320 this muscle, in addition to causing a slightly larger scar. However, it provides great visualization  
6  
7  
8 321 and manipulation and mobilization capability of the ruptured tendon, which provides a safer and  
9  
10 322 tension-free repair.

11  
12  
13 323 The arthroscopic technique is performed with some point-shaped cuts in the shoulder,  
14  
15 324 usually three or four; due to smaller incisions, it requires less muscle manipulation, which  
16  
17 325 theoretically would cause less postoperative pain and less muscle weakness of the deltoid muscle,  
18  
19  
20 326 it also has minor scars. However, this technique requires more surgeon's experience and the  
21  
22 327 mobilization of the ruptured tendon(s) is limited. Using a large amount of saline may cause edema  
23  
24 328 in the operated shoulder, which is usually resolved after the first 12 hours of surgery.

25  
26  
27 329 Finally, there is a minimal risk of loss of data confidentiality; all data will be managed,  
28  
29  
30 330 stored and protected by REDCAP software[34], [35]. Only the main investigator will have access  
31  
32 331 to all data during the entire trial period. Any adverse event will be reported to the researchers  
33  
34 332 involved and communicated to the main investigator according to the Institutional Review Boards  
35  
36  
37 333 description.

## 38 39 40 334 **12. Discussion**

41  
42  
43 335 There is no consensus about the best cost-effectiveness of surgical treatment of patients  
44  
45 336 with degenerative rotator cuff injuries. Several studies [27], [28], [50], [51] suggest that the open  
46  
47 337 repair method is more cost-effective than the arthroscopic method, resulting in the same clinical  
48  
49  
50 338 outcome with lower cost. Adla, Deepthi N. et. al [27] in a prospective nonrandomized study,  
51  
52 339 showed that both techniques lead to the same clinical outcomes. The costs of arthroscopic surgery  
53  
54 340 were higher than the open surgery, mainly due to the costs of the suture anchors, which was used

1  
2  
3 341 only in the arthroscopic group, is important to notice that in most of the open surgeries, the repair  
4  
5 342 was performed through transosseous sutures. Köse, Kamil Çağrı et. al [28], in a retrospective  
6  
7 343 study, also demonstrated similar clinical outcomes, although the costs of arthroscopic procedure  
8  
9 344 being much higher. Importantly, the open repair technique was performed using transosseous  
10  
11 345 sutures and the arthroscopic method using suture anchors and also, the open repair group required  
12  
13 346 longer length hospital stay. Hui, Yik Jing et. al [50] in a retrospective cohort study, described a  
14  
15 347 significantly higher cost for the arthroscopic procedure, compared to the open repair, evaluating  
16  
17 348 only the in-hospital costs, but with the same clinical outcomes. However, it is important to  
18  
19 349 emphasize that the open repair was performed using transosseous sutures, without suture anchors  
20  
21 350 and that the arthroscopic group needed a longer surgery time. Churchill, R.S. et. al [51] using the  
22  
23 351 New York Ambulatory Database System, with a total of 5,224 cuff repair surgeries, of which  
24  
25 352 1,334 open repair and 3,890 arthroscopic repair, showed that the mini-open rotator cuff repair costs  
26  
27 353 significantly less than the arthroscopic repair and requires significantly less surgical time.  
28  
29 354 However, no clinical outcomes have been analyzed in this study, making it impossible to determine  
30  
31 355 the cost-effectiveness ratio. An important study by Carr, A.J. et. al [52] carried out as a prospective  
32  
33 356 multicenter randomized clinical trial, concluded that there is no difference in the effectiveness and  
34  
35 357 cost-effectiveness between the open repair surgery and arthroscopic surgery after 24 months of  
36  
37 358 follow-up, even with the higher initial costs in the arthroscopy surgery. An economic evaluation  
38  
39 359 of the data from this study was carried out, showing that the Incremental Cost Effectiveness (ICER)  
40  
41 360 was uncertain and the arthroscopic repair surgery was slightly more costly and less effective than  
42  
43 361 open repair surgery.  
44  
45  
46  
47  
48  
49  
50

51  
52 362 Thus, despite the high incidence of rotator cuff tear, there is insufficient evidence to  
53  
54 363 determine the best method for treating these injuries. So, the present study proposes to answer the

1  
2  
3 364 clinical question of which method, open or arthroscopic, presents the best cost-utility in the  
4  
5 365 surgical treatment of rotator cuff tear. Providing conclusive, good quality evidence for and  
6  
7  
8 366 contributing to the evidence base of methods used to treat rotator cuff injuries.  
9

### 10 367 **13. Trial status**

11  
12  
13  
14 368 Protocol Trial version: 5 Date: 12/11/2020

15  
16  
17 369 Recruitment Start Date: August/2020

18  
19  
20 370 Recruitment Estimated End Date: December/2021

21  
22  
23 371 Recruiting

### 24 25 372 **14. Additional files (Supplementary Material)**

26  
27  
28 373 **Table 1.** Timetable of assessment

29  
30  
31 374 Informed Consent

32  
33  
34 375 Ethical Committee Review

35  
36  
37 376 SPIRIT Checklist

### 38 39 40 41 377 **15. Abbreviations**

42  
43  
44 378 CONSORT: Consolidated standards of reporting trials; VAS: Visual analogue scale; MRI:

45  
46 379 magnetic resonance imaging; QALY: quality-adjusted life years; CM: Constant-Murley Score;

47  
48  
49 380 SST: Simple Shoulder Test

### 50 51 52 381 **16. Declarations**

## 382 **16.1 Ethics Approval and Consent to Participate**

383 The study has been approved by the local Research Ethics Committee from both  
384 institutions: Hospital Israelita Albert Einstein (CAAE 19182619.3.1001.0071) and Hospital  
385 Alvorada Moema/ Hospital Pró-Cardíaco (CAAE 19182619.3.2002.5533). Digital, informed  
386 consent to participate will be obtained from all participants through software REDCAP[35][34].

387 All and any modifications in this study will be promptly reported to all Research Ethics  
388 Committee, all institutions, all investigators and all participants.

## 389 **16.2 Consent for Publication**

390 Not Applicable

## 391 **16.3 Availability of Data and Materials**

392 The datasets used and/or analyzed during the current study will be available from the  
393 corresponding author upon request.

## 394 **16.4 Competing interests**

395 The authors declare that they have no competing interests.

## 396 **16.5 Funding**

397 This study is supported by Fundação de Amparo à Pesquisa do Estado de São Paulo (FAPESP  
398 2019/02159-3).

## 399 **16.6 Registry**

1  
2  
3 400 The project is registered in the clinicaltrials.gov database (NCT04146987  
4  
5 401 <https://clinicaltrials.gov/ct2/show/NCT04146987?term=NCT04146987&draw=2&rank=1>).  
6  
7  
8

## 9 402 **16.7 Contributorship Statement**

10  
11  
12 403 All listed authors had a substantial contribution to the conceptions and development of this study,  
13  
14 404 revised, approved the final version and are accountable for all aspects of the study. We ensure that  
15  
16 405 all questions related to the accuracy or integrity of any part of the project are appropriately  
17  
18 406 investigated and resolved. Contributions were as follows:  
19  
20  
21  
22

23 407 ML is the Chief Investigator; he conceived the study, led the proposal and protocol  
24  
25  
26 408 development.  
27  
28  
29

30 409 RP is the lead trial methodologist and helped in the study conceiving and development  
31  
32  
33

34 410 EA contributed to study design and to development of the proposal.  
35  
36  
37

38 411 IO contributes to study design related to QALY  
39  
40  
41

42 412 IQC is responsible for cost-analysis  
43  
44

45 413 FM helped in the English translation and registration/publication of the trial  
46  
47  
48

49 414 PF helped in the English translation and registration/publication of the trial  
50  
51  
52

53 415 EFC helped in the study conceiving and development  
54  
55

56 416 BAM helped in the study conceiving and development  
57  
58  
59



1  
2  
3 417 **16.8 Acknowledgements**  
4

5  
6 418 Not applicable  
7

8  
9 419 **17. Dissemination policy**  
10

11  
12 420 All the authors are committed and agree to publish the full results of the research, despite the final  
13  
14 421 results.  
15

16  
17 422 **18. Data Monitoring Committee (DMC)**  
18

19  
20 423 Since this trial have a short duration and both surgical techniques have known minimal risks, there  
21  
22 424 is no need for such committee.  
23  
24

25  
26 425 **19. References**  
27

- 28  
29 426 [1] R. C. M. Iii *et al.*, “The Societal and Economic Value of Rotator Cuff Repair,” pp. 1993–  
30  
31 427 2000, 2013.  
32  
33 428 [2] I. O. Kuye, N. B. Jain, L. Warner, J. H. Herndon, and J. J. P. Warner, “Economic evaluations  
34  
35 429 in shoulder pathologies: A systematic review of the literature,” *J. Shoulder Elb. Surg.*, 2012.  
36  
37 430 [3] American Academy of Orthopaedic Surgeons, “Management of Rotator Cuff Injuries  
38  
39 431 Clinical Practice Guideline,” *Orthoguidelines*, 2019.  
40  
41 432 [4] A. J. K. Ostör, C. A. Richards, A. T. Prevost, C. A. Speed, and B. L. Hazleman, “Diagnosis  
42  
43 433 and relation to general health of shoulder disorders presenting to primary care.,”  
44  
45 434 *Rheumatology (Oxford)*., 2005.  
46  
47 435 [5] L. Favard, G. Bacle, and J. Berhouet, “Rotator cuff repair.,” *Joint. Bone. Spine*, 2007.  
48  
49 436 [6] S. Gumina, S. Carbone, V. Campagna, V. Candela, F. M. Sacchetti, and G. Giannicola,  
50  
51 437 “The impact of aging on rotator cuff tear size,” *Musculoskelet. Surg.*, vol. 97, no. 1 SUPPL,  
52  
53  
54  
55  
56

1  
2  
3 438 pp. 69–72, 2013.

4  
5 439 [7] L. Nové-Josserand, G. Walch, P. Adeleine, and P. Courpron, “Effect of age on the natural  
6  
7  
8 440 history of the shoulder: a clinical and radiological study in the elderly,” *Rev. Chir. Orthop.*  
9  
10 441 *Reparatrice Appar. Mot.*, 2005.

11  
12 442 [8] K. Yamaguchi, A. M. Tetro, O. Blam, B. A. Evanoff, S. A. Teefey, and W. D. Middleton,  
13  
14  
15 443 “Natural history of asymptomatic rotator cuff tears: A longitudinal analysis of  
16  
17 444 asymptomatic tears detected sonographically,” *J. Shoulder Elb. Surg.*, 2001.

18  
19 445 [9] C. Tempelaere *et al.*, “Dynamic Three-Dimensional Shoulder Mri during Active Motion for  
20  
21  
22 446 Investigation of Rotator Cuff Diseases,” *PLoS One*, vol. 11, no. 7, p. e0158563, 2016.

23  
24 447 [10] Y. Sela *et al.*, “Rotator cuff tears: correlation between geometric tear patterns on MRI and  
25  
26 448 arthroscopy and pre- and postoperative clinical findings,” *Acta Radiol*, vol. 56, no. 2, pp.  
27  
28 449 182–189, 2015.

29  
30  
31 450 [11] S. A. Teefey, D. A. Rubin, W. D. Middleton, C. F. Hildebolt, R. A. Leibold, and K.  
32  
33 451 Yamaguchi, “Detection and Quantification of Rotator Cuff Tears: Comparison of  
34  
35 452 Ultrasonographic, Magnetic Resonance Imaging, and Arthroscopic Findings in Seventy-  
36  
37 453 One Consecutive Cases,” *J. Bone Jt. Surg. - Ser. A*, 2004.

38  
39  
40 454 [12] A. O. G. Jason E. Hsu Steven B. Lippitt, Frederick A. Matsen III, “Rockwood and Matsen’s  
41  
42 455 The Shoulder, 5th Edition: The Rotator Cuff,” in *Rockwood and Matsen’s The Shoulder,*  
43  
44 456 *5th Edition*, 5th ed., Elsevier, 2016, pp. 651–719.

45  
46  
47 457 [13] S. Yamakawa, H. Hashizume, N. Ichikawa, E. Itadera, and H. Inoue, “Comparative studies  
48  
49 458 of MRI and operative findings in rotator cuff tear,” *Acta Med. Okayama*, 2001.

50  
51 459 [14] J. S. Roy *et al.*, “Diagnostic accuracy of ultrasonography, MRI and MR arthrography in the  
52  
53 460 characterisation of rotator cuff disorders: A systematic review and meta-analysis,” *British*

- 1  
2  
3 461 *Journal of Sports Medicine*. 2015.
- 4  
5 462 [15] M. Lenza, R. Buchbinder, Y. Takwoingi, R. V. Johnston, N. C. A. Hanchard, and F.  
6  
7 463 Faloppa, “Magnetic resonance imaging, magnetic resonance arthrography and  
8  
9 464 ultrasonography for assessing rotator cuff tears in people with shoulder pain for whom  
10  
11 465 surgery is being considered,” *Cochrane Database of Systematic Reviews*. 2013.
- 12  
13  
14 466 [16] H. Handoll, N. Hanchard, M. Lenza, and R. Buchbinder, “Rotator cuff tears and shoulder  
15  
16 467 impingement: a tale of two diagnostic test accuracy reviews,” *Cochrane Database Syst.*  
17  
18 468 *Rev.*, vol. 10, no. October, p. ED000068, 2013.
- 19  
20  
21 469 [17] N. C. A. Hanchard, M. Lenza, H. H. G. Handoll, and Y. Takwoingi, “Physical tests for  
22  
23 470 shoulder impingements and local lesions of bursa, tendon or labrum that may accompany  
24  
25 471 impingement,” *Cochrane Database of Systematic Reviews*. 2013.
- 26  
27  
28 472 [18] J. C. Seida *et al.*, “Systematic review: Nonoperative and operative treatments for rotator  
29  
30 473 cuff tears,” *Annals of Internal Medicine*. 2010.
- 31  
32  
33 474 [19] R. Ainsworth and J. S. Lewis, “Exercise therapy for the conservative management of full  
34  
35 475 thickness tears of the rotator cuff: A systematic review,” *British Journal of Sports Medicine*.  
36  
37 476 2007.
- 38  
39  
40 477 [20] W. Eljabu, H. M. Klinger, and M. von Knoch, “The natural history of rotator cuff tears: a  
41  
42 478 systematic review,” *Arch. Orthop. Trauma Surg.*, 2015.
- 43  
44  
45 479 [21] F. Oliva *et al.*, “I.S.Mu.L.T - Rotator cuff tears guidelines,” *Muscles. Ligaments Tendons*  
46  
47 480 *J.*, vol. 5, no. 4, pp. 227–263, 2015.
- 48  
49 481 [22] G. Arce *et al.*, “Management of disorders of the rotator cuff: Proceedings of the ISAKOS  
50  
51 482 upper extremity committee consensus meeting,” *Arthroscopy - Journal of Arthroscopic and*  
52  
53 483 *Related Surgery*. 2013.

- 1  
2  
3 484 [23] P. Van Der Zwaal, B. J. W. Thomassen, M. J. Nieuwenhuijse, R. Lindenburg, J. W. A.  
4  
5 485 Swen, and E. R. A. Van Arkel, “Clinical outcome in all-arthroscopic versus mini-open  
6  
7 486 rotator cuff repair in small to medium-sized tears: A randomized controlled trial in 100  
8  
9  
10 487 patients with 1-year follow-up,” *Arthrosc. - J. Arthrosc. Relat. Surg.*, vol. 29, no. 2, pp.  
11  
12 488 266–273, 2013.
- 14 489 [24] K. Morse, A. D. Davis, R. Afra, E. Krall Kaye, A. Schepsis, and I. Voloshin, “Arthroscopic  
15  
16  
17 490 versus mini-open rotator cuff repair: A comprehensive review and meta-analysis,” *Am. J.*  
18  
19 491 *Sports Med.*, 2008.
- 21 492 [25] X. Ji, C. Bi, F. Wang, and Q. Wang, “Arthroscopic versus mini-open rotator cuff repair: An  
22  
23 493 up-to-date meta-analysis of randomized controlled trials,” *Arthrosc. - J. Arthrosc. Relat.*  
24  
25 494 *Surg.*, vol. 31, no. 1, pp. 118–124, 2015.
- 28 495 [26] R. Huang, S. Wang, Y. Wang, X. Qin, and Y. Sun, “Systematic Review of All-Arthroscopic  
29  
30 496 Versus Mini-Open Repair of Rotator Cuff Tears: A Meta-Analysis,” *Scientific Reports.*  
31  
32 497 2016.
- 35 498 [27] D. N. Adla, M. Rowsell, and R. Pandey, “Cost-effectiveness of open versus arthroscopic  
36  
37 499 rotator cuff repair,” *J. Shoulder Elb. Surg.*, 2010.
- 40 500 [28] K. Ç. Köse *et al.*, “Mini-open versus all-arthroscopic rotator cuff repair: Comparison of the  
41  
42 501 operative costs and the clinical outcomes,” *Adv. Ther.*, 2008.
- 44 502 [29] M. A. Vitale, M. G. Vitale, J. G. Zivin, J. P. Braman, L. U. Bigliani, and E. L. Flatow,  
45  
46 503 “Rotator cuff repair: An analysis of utility scores and cost-effectiveness,” *J. Shoulder Elb.*  
47  
48 504 *Surg.*, 2007.
- 51 505 [30] G. D. Sanders *et al.*, “Recommendations for conduct, methodological practices, and  
52  
53 506 reporting of cost-effectiveness analyses: Second panel on cost-effectiveness in health and

- 1  
2  
3 507 medicine,” *JAMA - Journal of the American Medical Association*. 2016.  
4  
5 508 [31] A. W. Chan *et al.*, “SPIRIT 2013 statement: Defining standard protocol items for clinical  
6  
7  
8 509 trials,” *Annals of Internal Medicine*. 2013.  
9  
10 510 [32] J. Kukkonen, T. Kauko, T. Vahlberg, A. Joukainen, and V. Äärimaa, “Investigating minimal  
11  
12 511 clinically important difference for Constant score in patients undergoing rotator cuff  
13  
14 512 surgery,” *J. Shoulder Elb. Surg.*, 2013.  
15  
16 513 [33] L. NCSS, “PASS 14 Power Analysis and Sample Size Software.” Kaysville, Utah, USA,  
17  
18 514 2015.  
19  
20 515 [34] P. A. Harris, R. Taylor, R. Thielke, J. Payne, N. Gonzalez, and J. G. Conde, “Research  
21  
22 516 electronic data capture (REDCap)-A metadata-driven methodology and workflow process  
23  
24 517 for providing translational research informatics support,” *J. Biomed. Inform.*, 2009.  
25  
26 518 [35] P. A. Harris *et al.*, “The REDCap consortium: Building an international community of  
27  
28 519 software platform partners,” *Journal of Biomedical Informatics*. 2019.  
29  
30 520 [36] A. Vijayanathan and O. Nawawi, “The importance of Good Clinical Practice guidelines  
31  
32 521 and its role in clinical trials,” *Biomedical Imaging and Intervention Journal*. 2008.  
33  
34 522 [37] E. Englev and K. P. Petersen, “[ICH-GCP Guideline: quality assurance of clinical trials.  
35  
36 523 Status and perspectives].,” *Ugeskr. Laeger*, 2003.  
37  
38 524 [38] R. P. G. Barreto, M. L. L. Barbosa, M. A. A. Balbinotti, F. C. Mothes, L. H. T. da Rosa,  
39  
40 525 and M. F. Silva, “Versão brasileira do Constant-Murley Score (CMS-BR): validade  
41  
42 526 convergente e de constructo, consistência interna e unidimensionalidade,” *Rev. Bras.*  
43  
44 527 *Ortop.*, vol. 51, no. 5, pp. 515–520, 2016.  
45  
46 528 [39] F. Angst, H. K. Schwyzer, A. Aeschlimann, B. R. Simmen, and J. Goldhahn, “Measures of  
47  
48 529 adult shoulder function: Disabilities of the Arm, Shoulder, and Hand Questionnaire (DASH)  
49  
50  
51  
52  
53  
54  
55  
56  
57  
58  
59  
60

- 1  
2  
3 530 and Its Short Version (QuickDASH), Shoulder Pain and Disability Index (SPADI),  
4  
5 531 American Shoulder and Elbow Surgeons (ASES) Society Standardized Shoulder ,” *Arthritis*  
6  
7  
8 532 *Care Res.*, vol. 63, no. SUPPL. 11, pp. 174–188, 2011.
- 9  
10 533 [40] C. R. Constant, C. Gerber, R. J. H. Emery, J. O. Søjbjerg, F. Gohlke, and P. Boileau, “A  
11  
12 534 review of the Constant score: Modifications and guidelines for its use,” *J. Shoulder Elb.*  
13  
14 535 *Surg.*, vol. 17, no. 2, pp. 355–361, 2008.
- 15  
16  
17 536 [41] F. Noronha, “Associação Portuguesa de Economia da Saúde Lara de Noronha e Ferreira,”  
18  
19 537 p. 46, 2002.
- 20  
21 538 [42] J. O. B. Neto *et al.*, “Validation of the Simple Shoulder Test in a Portuguese-Brazilian  
22  
23 539 Population. Is the Latent Variable Structure and Validation of the Simple Shoulder Test  
24  
25 540 Stable across Cultures?,” *PLoS One*, vol. 8, no. 5, pp. 1–8, 2013.
- 26  
27  
28 541 [43] D. A. Delgado *et al.*, “Validation of Digital Visual Analog Scale Pain Scoring With a  
29  
30 542 Traditional Paper-based Visual Analog Scale in Adults,” *JAAOS Glob. Res. Rev.*, 2018.
- 31  
32  
33 543 [44] R. A. Ribeiro *et al.*, “Diretriz metodológica para estudos de avaliação econômica de  
34  
35 544 tecnologias em saúde no Brasil Methodological guidelines for economic evaluation studies  
36  
37 545 of health technologies in Brazil,” *J Bras Econ Saúde*, 2016.
- 38  
39  
40 546 [45] R. A. Ribeiro *et al.*, “Methodological guidelines for economic evaluation studies of health  
41  
42 547 technologies in Brazil,” *J Bras Econ Saúde*, 2016.
- 43  
44  
45 548 [46] J. E. Siegel, “Recommendations for reporting cost-effectiveness analyses. Panel on Cost-  
46  
47 549 Effectiveness in Health and Medicine,” *JAMA J. Am. Med. Assoc.*, vol. 276, no. 16, pp.  
48  
49 550 1339–1341, 1996.
- 50  
51 551 [47] J. Ludbrook, “PRACTICAL STATISTICS FOR MEDICAL RESEARCH,” *Australian and*  
52  
53 552 *New Zealand Journal of Surgery*. 1991.

- 1  
2  
3 553 [48] J. J. Faraway, *Extending the linear model with R: generalized linear, mixed effects and*  
4  
5 554 *nonparametric regression models*. 2006.  
6  
7  
8 555 [49] IBM Corp., “IBM SPSS Statistics for Windows, Version 24.0,” 2016. 2016.  
9  
10 556 [50] Y. J. Hui, A. Q. A. Teo, S. Sharma, B. H. M. Tan, and V. Prem Kumar, “Immediate costs  
11  
12 557 of mini-open versus arthroscopic rotator cuff repair in an Asian population,” *J. Orthop.*  
13  
14 558 *Surg.*, vol. 25, no. 1, pp. 1–6, 2017.  
15  
16  
17 559 [51] R. S. Churchill and J. K. Ghorai, “Total cost and operating room time comparison of rotator  
18  
19 560 cuff repair techniques at low, intermediate, and high volume centers: Mini-open versus all-  
20  
21 561 arthroscopic,” *J. Shoulder Elb. Surg.*, 2010.  
22  
23  
24 562 [52] A. J. Carr *et al.*, “Clinical effectiveness and cost-effectiveness of open and arthroscopic  
25  
26 563 rotator cuff repair [the UK rotator cuff surgery (UKUFF) randomised trial],” *Health*  
27  
28 564 *Technol. Assess. (Rockv)*., 2015.  
29  
30  
31 565



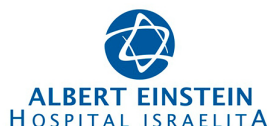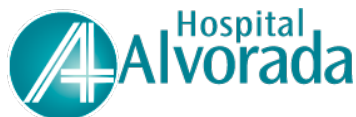

## TERMO DE CONSENTIMENTO LIVRE E ESCLARECIDO

### **Título do projeto: Custo-Efetividade da Cirurgia de Reparo do Manguito Rotador Pelas Técnicas Aberta e Artroscópica. Ensaio Clínico Randomizado.**

Prezado,

Você foi convidado a participar da pesquisa intitulada “Custo-Efetividade da Cirurgia de Reparo do Manguito Rotador Pelas Técnicas Aberta e Artroscópica. Ensaio Clínico Randomizado”. Essas informações serão fornecidas por meio de sua participação voluntária neste estudo, com o objetivo de avaliar o custo-efetividade (benefícios e malefícios e os custos dos procedimentos) das intervenções: reparo aberto do manguito rotador e reparo artroscópico do manguito rotador.

A ruptura do manguito rotador, ou seja, o rompimento dos tendões do ombro é a principal de causa de dor no ombro na população adulta, causando, além da dor, diminuição da força no ombro acometido e diminuição na qualidade de vida do paciente, devido a dor constante e piora na qualidade do sono, causado pela dor. Existem duas técnicas cirúrgicas para correção desta doença: a técnica aberta, realizada por uma incisão (corte) no ombro e visualização direta do tendão rompido; e a técnica artroscópica, realizada através de pequenos corte no ombro, por onde são introduzidos câmera de vídeo, para visualização do tendão rompido através de monitor, e instrumentais para realização da cirurgia. A motivação da realização deste estudo se deve ao fato de encontrarmos na literatura atual dúvidas sobre qual método de reparo do manguito rotador apresenta a melhora relação custo-efetividade. Acreditamos que o reparo aberto do manguito rotador apresente os mesmos resultados funcionais e de qualidade de vida que o reparo artroscópico do manguito rotador, além de apresentar um custo menor.

#### *Procedimentos a serem utilizados:*

O número de participantes estimado é de 100 indivíduos, divididos em dois grupos, 50 para o grupo de reparo aberto do manguito rotador e 50 para o grupo de reparo artroscópico do manguito rotador. A seleção será feita de forma randomizada, isto é, não saberemos onde cada indivíduo será incluído.

Os dois grupos de pacientes receberão os mesmos cuidados e os mesmos seguimentos. As avaliações serão realizadas por meio de exames clínicos e funcionais (realizados por um médico) no pré-operatório, 6, 24 e 48 semanas após o procedimento cirúrgico, exame de ressonância magnética no pré-operatório e 48 semanas após o procedimento. O programa de reabilitação após as intervenções de tratamento será idêntico em cada um dos grupos comparados. Todos os pacientes utilizarão tipóia do tipo Velpau por seis semanas; depois de duas semanas da intervenção, você iniciará um programa de exercícios pendulares orientados pelo médico e após a sexta semana, a tipóia será retirada e você será orientado a realizar exercícios domésticos para ganho de arco de movimento (ADM), além de duas sessões semanais de fisioterapia para analgesia e recuperação da amplitude de movimento do ombro. Os exercícios de fortalecimento serão permitidos a partir da décima segunda semana, sob orientação de fisioterapeuta.

No término do estudo será verificado se houve melhora nas avaliações funcionais, de qualidade de vida e cicatrização do tendão reparado por meio de questionários de simples preenchimento e exame de ressonância magnética.

Você não terá benefício além do esperado para a operação de correção da lesão, esperando-se melhora da dor e função do ombro acometido. Os riscos do presente estudo são aqueles inerentes a qualquer tratamento cirúrgico e procedimento anestésico, como infecção da ferida operatória, formação de cicatriz, dor, limitação do arco de movimento do ombro, rerruptura do manguito rotador, lesão neurovascular. Ambas as técnicas cirúrgicas tem o mesmo objetivo, ou seja, reparar o tendão rompido ao osso. A técnica aberta necessita de uma incisão (corte) maior, além de maior dissecação cirúrgica e manipulação do músculo deltoide, o que pode provocar maior dor pós-operatória e fraqueza desse músculo, além de causar uma cicatriz pouco maior. Entretanto, ela provê uma grande visualização e capacidade de manipulação e mobilização do tendão rompido, o que proporciona um reparo mais

Número: \_\_\_\_\_

Iniciais: \_\_\_\_ \_\_\_\_

1

Rubrica: 1) Paciente/Representante Legal/Testemunha Imparcial \_\_\_\_\_ 2) Responsável pelo consentimento \_\_\_\_\_



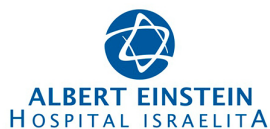

seguro e livre de tensão. Já a técnica artroscópica é realizada com alguns cortes puntiformes no ombro, geralmente três ou quatro; pelas incisões (cortes) menores, ela necessita de menos manipulação muscular, o que teoricamente causaria menos dor pós-operatória e menos fraqueza muscular do músculo deltoide; além disso, apresenta cicatrizes menores. No entanto, é uma técnica que demanda mais experiência do cirurgião e a mobilização do(s) tendão(ões) rompido(s) é limitada; a utilização de grande quantidade de soro fisiológico pode causar edema no ombro operado, o que geralmente é revertido após as primeiras 12 horas da cirurgia.

Trata-se de um estudo que testará a hipótese de que a cirurgia de reparo aberto do manguito rotador apresenta uma melhor relação custo-efetividade que a cirurgia de reparo artroscópico do manguito rotador. Somente no final do estudo poderemos determinar a presença de alguma diferença entre estes dois tipos de tratamento.

Em qualquer etapa do estudo, você terá acesso aos profissionais responsáveis pela pesquisa para esclarecimento de eventuais dúvidas. O coordenador do projeto é o Dr. Mário Lenza e o principal responsável pelo estudo é o Dr. Rafael Pierami, que podem ser encontrados: Dr. Mario Lenza – endereço Av. Albert Einstein, 627 – bloco A1 – 3º andar – Programa Locomotor, Morumbi, São Paulo – CEP 05652-900: Tel: (11) 2151.1444; e-mail: [mario.lenza@einstein.br](mailto:mario.lenza@einstein.br); e Dr. Rafael Pierami – endereço Avenida Ministro Gabriel Rezende de Passos, 550, 2º andar, Hospital Alvorada Moema – Centro de Excelência em Cirurgia de Ombro e Cotovelo, Moema, São Paulo – CEP 04521-022 – Tel: (11) 2186-9810 ou (11) 2186-9809; e-mail: [rafael\\_pierami@hotmail.com](mailto:rafael_pierami@hotmail.com).

Se você tiver qualquer dúvida ética em relação à pesquisa, entre em contato com o **Comitê de Ética em Pesquisa do Hospital Israelita Albert Einstein** - Av. Albert Einstein 627/701, fone 2151-3729, e-mail: [cep@einstein.br](mailto:cep@einstein.br) ou o **Comitê de Pesquisa do Hospital Alvorada**- Av. Ministro Gabriel de Rezende Passos, 550, 2º andar, telefones 2186-9810 ou 2186-9809, e-mail: [rafael\\_pierami@hotmail.com](mailto:rafael_pierami@hotmail.com) ou ainda o Comitê de Ética em Pesquisa em Seres Humanos do Hospital Pró-Cardíaco (CEP/HPC), Tel: (21) 3289-3802, Localizado na Rua Voluntários da Pátria, 435/8º andar, Botafogo, Rio de Janeiro, CEP: 22270-005 - Horário de atendimento: de segunda à sexta-feira, das 09:00h às 16:00h.

Reclamações, elogios e sugestões deverão ser encaminhados ao Sistema de Atendimento ao Cliente (SAC) por meio do telefone (11) 2151-0222 ou formulário identificado como fale conosco disponível na página da pesquisa clínica ou pessoalmente.

Você pode retirar o seu consentimento a qualquer momento e deixar de participar do estudo, sem qualquer prejuízo à continuidade de seu tratamento na Instituição.

Suas informações serão analisadas em conjunto com as informações de outros pacientes voluntários e não será divulgada a identificação de nenhum paciente. Você tem o direito de ser mantido atualizado sobre os resultados parciais das pesquisas e de quaisquer resultados que sejam do conhecimento dos pesquisadores. Não haverá nenhuma despesa pessoal para você em qualquer fase do estudo, incluindo exames e consultas, assim como também não há compensação financeira relacionada à sua participação.

Se você sofrer algum dano, previsto ou não neste termo de consentimento e relacionado com sua participação no estudo, a equipe que realizou o procedimento custeará as despesas médicas necessárias e decorrentes do estudo.

O pesquisador se compromete a utilizar os dados e materiais coletado durante o estudo somente para esta pesquisa, como descrito previamente.

Eu discuti com o Dr. Mário Lenza e/ou Dr. Rafael Pierami e/ou qualquer membro autorizado da equipe desta pesquisa, sobre a minha decisão em participar neste estudo. Ficaram claros para mim quais são os propósitos do estudo, os procedimentos a serem realizados, seus eventuais desconfortos e riscos, as garantias de confidencialidade e de esclarecimentos permanentes. Ficou claro também que minha participação é isenta de despesas e que tenho garantia do acesso a tratamento hospitalar quando necessário. Concordo voluntariamente em participar deste estudo e poderei retirar o meu consentimento a qualquer momento, antes ou durante o mesmo, sem penalidades ou prejuízo ou perda de qualquer benefício que eu possa ter adquirido, ou no meu atendimento neste Serviço.

Número: \_\_\_\_\_

Iniciais: \_\_\_\_ \_\_\_\_

2

Rubrica: 1) Paciente/Representante Legal/Testemunha Imparcial \_\_\_\_\_ 2) Responsável pelo consentimento \_\_\_\_\_

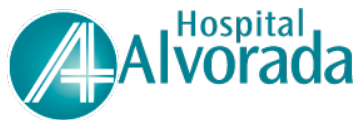

Nome Completo do participante da pesquisa

Assinatura do participante da pesquisa Data: \_\_\_/\_\_\_/\_\_\_

Nome completo e legível do pesquisador responsável

Assinatura do pesquisador responsável Data: \_\_\_/\_\_\_/\_\_\_

Nome completo do representante legal

Assinatura do representante legal Data: \_\_\_/\_\_\_/\_\_\_

Relação do representante legal com o paciente

Nome completo da testemunha imparcial

**\*\*para casos de voluntários menores de 18 anos, analfabetos, semi-analfabetos ou portadores de deficiência auditiva ou visual.**

Assinatura da testemunha imparcial Data: \_\_\_/\_\_\_/\_\_\_

Número: \_\_\_\_\_

Iniciais: \_\_\_\_\_

3

Rubrica: 1) Paciente/Representante Legal/Testemunha Imparcial \_\_\_\_\_ 2) Responsável pelo consentimento \_\_\_\_\_

# Reporting checklist for protocol of a clinical trial.

Based on the SPIRIT guidelines.

**Title:** Cost-Utility of Rotator Cuff Repair Surgery by Open and Arthroscopic Techniques: Study Protocol for a Randomized Clinical Trial.

|                                                         |                     | Reporting Item                                                                                                                                                                                                                                                                           | Page Number |
|---------------------------------------------------------|---------------------|------------------------------------------------------------------------------------------------------------------------------------------------------------------------------------------------------------------------------------------------------------------------------------------|-------------|
| <b>Administrative information</b>                       |                     |                                                                                                                                                                                                                                                                                          |             |
| Title                                                   | <a href="#">#1</a>  | Descriptive title identifying the study design, population, interventions, and, if applicable, trial acronym                                                                                                                                                                             | 01          |
| Trial registration                                      | <a href="#">#2a</a> | Trial identifier and registry name. If not yet registered, name of intended registry                                                                                                                                                                                                     | 03          |
| Trial registration: data set                            | <a href="#">#2b</a> | All items from the World Health Organization Trial Registration Data Set                                                                                                                                                                                                                 | 05          |
| Protocol version                                        | <a href="#">#3</a>  | Date and version identifier                                                                                                                                                                                                                                                              | 17          |
| Funding                                                 | <a href="#">#4</a>  | Sources and types of financial, material, and other support                                                                                                                                                                                                                              | 18          |
| Roles and responsibilities: contributorship             | <a href="#">#5a</a> | Names, affiliations, and roles of protocol contributors                                                                                                                                                                                                                                  | 18;19       |
| Roles and responsibilities: sponsor contact information | <a href="#">#5b</a> | Name and contact information for the trial sponsor                                                                                                                                                                                                                                       | 01          |
| Roles and responsibilities: sponsor and funder          | <a href="#">#5c</a> | Role of study sponsor and funders, if any, in study design; collection, management, analysis, and interpretation of data; writing of the report; and the decision to submit the report for publication, including whether they will have ultimate authority over any of these activities | 06          |
| Roles and responsibilities:                             | <a href="#">#5d</a> | Composition, roles, and responsibilities of the coordinating centre, steering committee, endpoint adjudication committee,                                                                                                                                                                | 05          |

|    |                           |                      |                                                                    |       |
|----|---------------------------|----------------------|--------------------------------------------------------------------|-------|
| 1  | committees                |                      | data management team, and other individuals or groups              |       |
| 2  |                           |                      | overseeing the trial, if applicable (see Item 21a for data         |       |
| 3  |                           |                      | monitoring committee)                                              |       |
| 4  |                           |                      |                                                                    |       |
| 5  | <b>Introduction</b>       |                      |                                                                    |       |
| 6  |                           |                      |                                                                    |       |
| 7  |                           |                      |                                                                    |       |
| 8  | Background and            | <a href="#">#6a</a>  | Description of research question and justification for             | 3;4;5 |
| 9  | rationale                 |                      | undertaking the trial, including summary of relevant studies       |       |
| 10 |                           |                      | (published and unpublished) examining benefits and harms for       |       |
| 11 |                           |                      | each intervention                                                  |       |
| 12 |                           |                      |                                                                    |       |
| 13 |                           |                      |                                                                    |       |
| 14 | Background and            | <a href="#">#6b</a>  | Explanation for choice of comparators                              | 3;4;5 |
| 15 | rationale: choice of      |                      |                                                                    |       |
| 16 | comparators               |                      |                                                                    |       |
| 17 |                           |                      |                                                                    |       |
| 18 |                           |                      |                                                                    |       |
| 19 | Objectives                | <a href="#">#7</a>   | Specific objectives or hypotheses                                  | 5     |
| 20 |                           |                      |                                                                    |       |
| 21 |                           |                      |                                                                    |       |
| 22 | Trial design              | <a href="#">#8</a>   | Description of trial design including type of trial (eg, parallel  | 5     |
| 23 |                           |                      | group, crossover, factorial, single group), allocation ratio, and  |       |
| 24 |                           |                      | framework (eg, superiority, equivalence, non-inferiority,          |       |
| 25 |                           |                      | exploratory)                                                       |       |
| 26 |                           |                      |                                                                    |       |
| 27 |                           |                      |                                                                    |       |
| 28 |                           |                      |                                                                    |       |
| 29 | <b>Methods:</b>           |                      |                                                                    |       |
| 30 | <b>Participants,</b>      |                      |                                                                    |       |
| 31 | <b>interventions, and</b> |                      |                                                                    |       |
| 32 | <b>outcomes</b>           |                      |                                                                    |       |
| 33 |                           |                      |                                                                    |       |
| 34 |                           |                      |                                                                    |       |
| 35 |                           |                      |                                                                    |       |
| 36 | Study setting             | <a href="#">#9</a>   | Description of study settings (eg, community clinic, academic      | 5;6   |
| 37 |                           |                      | hospital) and list of countries where data will be collected.      |       |
| 38 |                           |                      | Reference to where list of study sites can be obtained             |       |
| 39 |                           |                      |                                                                    |       |
| 40 |                           |                      |                                                                    |       |
| 41 | Eligibility criteria      | <a href="#">#10</a>  | Inclusion and exclusion criteria for participants. If applicable,  | 6;7   |
| 42 |                           |                      | eligibility criteria for study centres and individuals who will    |       |
| 43 |                           |                      | perform the interventions (eg, surgeons, psychotherapists)         |       |
| 44 |                           |                      |                                                                    |       |
| 45 |                           |                      |                                                                    |       |
| 46 | Interventions:            | <a href="#">#11a</a> | Interventions for each group with sufficient detail to allow       | 8;9   |
| 47 | description               |                      | replication, including how and when they will be administered      |       |
| 48 |                           |                      |                                                                    |       |
| 49 |                           |                      |                                                                    |       |
| 50 | Interventions:            | <a href="#">#11b</a> | Criteria for discontinuing or modifying allocated interventions    | 12    |
| 51 | modifications             |                      | for a given trial participant (eg, drug dose change in response to |       |
| 52 |                           |                      | harms, participant request, or improving / worsening disease)      |       |
| 53 |                           |                      |                                                                    |       |
| 54 |                           |                      |                                                                    |       |
| 55 | Interventions:            | <a href="#">#11c</a> | Strategies to improve adherence to intervention protocols, and     | 10;11 |
| 56 | adherence                 |                      | any procedures for monitoring adherence (eg, drug tablet return;   |       |
| 57 |                           |                      | laboratory tests)                                                  |       |
| 58 |                           |                      |                                                                    |       |
| 59 |                           |                      |                                                                    |       |
| 60 |                           |                      |                                                                    |       |

|    |                              |                      |                                                                  |          |
|----|------------------------------|----------------------|------------------------------------------------------------------|----------|
| 1  | Interventions:               | <a href="#">#11d</a> | Relevant concomitant care and interventions that are permitted   | NA       |
| 2  | concomitant care             |                      | or prohibited during the trial                                   |          |
| 3  |                              |                      |                                                                  |          |
| 4  |                              |                      |                                                                  |          |
| 5  | Outcomes                     | <a href="#">#12</a>  | Primary, secondary, and other outcomes, including the specific   | 10;11;12 |
| 6  |                              |                      | measurement variable (eg, systolic blood pressure), analysis     |          |
| 7  |                              |                      | metric (eg, change from baseline, final value, time to event),   |          |
| 8  |                              |                      | method of aggregation (eg, median, proportion), and time point   |          |
| 9  |                              |                      | for each outcome. Explanation of the clinical relevance of       |          |
| 10 |                              |                      | chosen efficacy and harm outcomes is strongly recommended        |          |
| 11 |                              |                      |                                                                  |          |
| 12 |                              |                      |                                                                  |          |
| 13 |                              |                      |                                                                  |          |
| 14 | Participant timeline         | <a href="#">#13</a>  | Time schedule of enrolment, interventions (including any run-    | 13       |
| 15 |                              |                      | ins and washouts), assessments, and visits for participants. A   |          |
| 16 |                              |                      | schematic diagram is highly recommended (see Figure)             |          |
| 17 |                              |                      |                                                                  |          |
| 18 |                              |                      |                                                                  |          |
| 19 |                              |                      |                                                                  |          |
| 20 | Sample size                  | <a href="#">#14</a>  | Estimated number of participants needed to achieve study         | 6        |
| 21 |                              |                      | objectives and how it was determined, including clinical and     |          |
| 22 |                              |                      | statistical assumptions supporting any sample size calculations  |          |
| 23 |                              |                      |                                                                  |          |
| 24 |                              |                      |                                                                  |          |
| 25 | Recruitment                  | <a href="#">#15</a>  | Strategies for achieving adequate participant enrolment to reach | 8        |
| 26 |                              |                      | target sample size                                               |          |
| 27 |                              |                      |                                                                  |          |
| 28 |                              |                      |                                                                  |          |
| 29 | <b>Methods: Assignment</b>   |                      |                                                                  |          |
| 30 | <b>of interventions (for</b> |                      |                                                                  |          |
| 31 | <b>controlled trials)</b>    |                      |                                                                  |          |
| 32 |                              |                      |                                                                  |          |
| 33 |                              |                      |                                                                  |          |
| 34 | Allocation: sequence         | <a href="#">#16a</a> | Method of generating the allocation sequence (eg, computer-      | 7;8      |
| 35 | generation                   |                      | generated random numbers), and list of any factors for           |          |
| 36 |                              |                      | stratification. To reduce predictability of a random sequence,   |          |
| 37 |                              |                      | details of any planned restriction (eg, blocking) should be      |          |
| 38 |                              |                      | provided in a separate document that is unavailable to those who |          |
| 39 |                              |                      | enrol participants or assign interventions                       |          |
| 40 |                              |                      |                                                                  |          |
| 41 |                              |                      |                                                                  |          |
| 42 |                              |                      |                                                                  |          |
| 43 |                              |                      |                                                                  |          |
| 44 | Allocation                   | <a href="#">#16b</a> | Mechanism of implementing the allocation sequence (eg, central   | 7;8      |
| 45 | concealment                  |                      | telephone; sequentially numbered, opaque, sealed envelopes),     |          |
| 46 | mechanism                    |                      | describing any steps to conceal the sequence until interventions |          |
| 47 |                              |                      | are assigned                                                     |          |
| 48 |                              |                      |                                                                  |          |
| 49 |                              |                      |                                                                  |          |
| 50 |                              |                      |                                                                  |          |
| 51 | Allocation:                  | <a href="#">#16c</a> | Who will generate the allocation sequence, who will enrol        | 7;8      |
| 52 | implementation               |                      | participants, and who will assign participants to interventions  |          |
| 53 |                              |                      |                                                                  |          |
| 54 |                              |                      |                                                                  |          |
| 55 | Blinding (masking)           | <a href="#">#17a</a> | Who will be blinded after assignment to interventions (eg, trial | 8        |
| 56 |                              |                      | participants, care providers, outcome assessors, data analysts), |          |
| 57 |                              |                      | and how                                                          |          |
| 58 |                              |                      |                                                                  |          |
| 59 |                              |                      |                                                                  |          |
| 60 |                              |                      |                                                                  |          |

|    |                            |                      |                                                                    |             |
|----|----------------------------|----------------------|--------------------------------------------------------------------|-------------|
| 1  | Blinding (masking):        | <a href="#">#17b</a> | If blinded, circumstances under which unblinding is permissible,   | 8           |
| 2  | emergency unblinding       |                      | and procedure for revealing a participant's allocated intervention |             |
| 3  |                            |                      | during the trial                                                   |             |
| 4  |                            |                      |                                                                    |             |
| 5  |                            |                      |                                                                    |             |
| 6  | <b>Methods: Data</b>       |                      |                                                                    |             |
| 7  | <b>collection,</b>         |                      |                                                                    |             |
| 8  | <b>management, and</b>     |                      |                                                                    |             |
| 9  | <b>analysis</b>            |                      |                                                                    |             |
| 10 |                            |                      |                                                                    |             |
| 11 |                            |                      |                                                                    |             |
| 12 |                            |                      |                                                                    |             |
| 13 | Data collection plan       | <a href="#">#18a</a> | Plans for assessment and collection of outcome, baseline, and      | 10;11;12;13 |
| 14 |                            |                      | other trial data, including any related processes to promote data  |             |
| 15 |                            |                      | quality (eg, duplicate measurements, training of assessors) and a  |             |
| 16 |                            |                      | description of study instruments (eg, questionnaires, laboratory   |             |
| 17 |                            |                      | tests) along with their reliability and validity, if known.        |             |
| 18 |                            |                      | Reference to where data collection forms can be found, if not in   |             |
| 19 |                            |                      | the protocol                                                       |             |
| 20 |                            |                      |                                                                    |             |
| 21 | Data collection plan:      | <a href="#">#18b</a> | Plans to promote participant retention and complete follow-up,     | 10;11;12;13 |
| 22 | retention                  |                      | including list of any outcome data to be collected for             |             |
| 23 |                            |                      | participants who discontinue or deviate from intervention          |             |
| 24 |                            |                      | protocols                                                          |             |
| 25 |                            |                      |                                                                    |             |
| 26 |                            |                      |                                                                    |             |
| 27 |                            |                      |                                                                    |             |
| 28 |                            |                      |                                                                    |             |
| 29 |                            |                      |                                                                    |             |
| 30 |                            |                      |                                                                    |             |
| 31 | Data management            | <a href="#">#19</a>  | Plans for data entry, coding, security, and storage, including any | 10;11       |
| 32 |                            |                      | related processes to promote data quality (eg, double data entry;  |             |
| 33 |                            |                      | range checks for data values). Reference to where details of data  |             |
| 34 |                            |                      | management procedures can be found, if not in the protocol         |             |
| 35 |                            |                      |                                                                    |             |
| 36 |                            |                      |                                                                    |             |
| 37 |                            |                      |                                                                    |             |
| 38 | Statistics: outcomes       | <a href="#">#20a</a> | Statistical methods for analysing primary and secondary            | 14          |
| 39 |                            |                      | outcomes. Reference to where other details of the statistical      |             |
| 40 |                            |                      | analysis plan can be found, if not in the protocol                 |             |
| 41 |                            |                      |                                                                    |             |
| 42 |                            |                      |                                                                    |             |
| 43 | Statistics: additional     | <a href="#">#20b</a> | Methods for any additional analyses (eg, subgroup and adjusted     | 14          |
| 44 | analyses                   |                      | analyses)                                                          |             |
| 45 |                            |                      |                                                                    |             |
| 46 |                            |                      |                                                                    |             |
| 47 | Statistics: analysis       | <a href="#">#20c</a> | Definition of analysis population relating to protocol non-        | 14          |
| 48 | population and missing     |                      | adherence (eg, as randomised analysis), and any statistical        |             |
| 49 | data                       |                      | methods to handle missing data (eg, multiple imputation)           |             |
| 50 |                            |                      |                                                                    |             |
| 51 |                            |                      |                                                                    |             |
| 52 | <b>Methods: Monitoring</b> |                      |                                                                    |             |
| 53 |                            |                      |                                                                    |             |
| 54 |                            |                      |                                                                    |             |
| 55 | Data monitoring:           | <a href="#">#21a</a> | Composition of data monitoring committee (DMC); summary of         | 20          |
| 56 | formal committee           |                      | its role and reporting structure; statement of whether it is       |             |
| 57 |                            |                      | independent from the sponsor and competing interests; and          |             |
| 58 |                            |                      |                                                                    |             |
| 59 |                            |                      |                                                                    |             |
| 60 |                            |                      |                                                                    |             |

|    |                          |                                                                                        |       |
|----|--------------------------|----------------------------------------------------------------------------------------|-------|
| 1  |                          | reference to where further details about its charter can be found,                     |       |
| 2  |                          | if not in the protocol. Alternatively, an explanation of why a                         |       |
| 3  |                          | DMC is not needed                                                                      |       |
| 4  |                          |                                                                                        |       |
| 5  | Data monitoring:         | <a href="#">#21b</a> Description of any interim analyses and stopping guidelines,      | 20    |
| 6  | interim analysis         | including who will have access to these interim results and make                       |       |
| 7  |                          | the final decision to terminate the trial                                              |       |
| 8  |                          |                                                                                        |       |
| 9  |                          |                                                                                        |       |
| 10 |                          |                                                                                        |       |
| 11 | Harms                    | <a href="#">#22</a> Plans for collecting, assessing, reporting, and managing solicited | 12    |
| 12 |                          | and spontaneously reported adverse events and other unintended                         |       |
| 13 |                          | effects of trial interventions or trial conduct                                        |       |
| 14 |                          |                                                                                        |       |
| 15 |                          |                                                                                        |       |
| 16 | Auditing                 | <a href="#">#23</a> Frequency and procedures for auditing trial conduct, if any, and   | NA    |
| 17 |                          | whether the process will be independent from investigators and                         |       |
| 18 |                          | the sponsor                                                                            |       |
| 19 |                          |                                                                                        |       |
| 20 |                          |                                                                                        |       |
| 21 | <b>Ethics and</b>        |                                                                                        |       |
| 22 | <b>dissemination</b>     |                                                                                        |       |
| 23 |                          |                                                                                        |       |
| 24 |                          |                                                                                        |       |
| 25 | Research ethics          | <a href="#">#24</a> Plans for seeking research ethics committee / institutional        | 5     |
| 26 | approval                 | review board (REC / IRB) approval                                                      |       |
| 27 |                          |                                                                                        |       |
| 28 |                          |                                                                                        |       |
| 29 | Protocol amendments      | <a href="#">#25</a> Plans for communicating important protocol modifications (eg,      | 6     |
| 30 |                          | changes to eligibility criteria, outcomes, analyses) to relevant                       |       |
| 31 |                          | parties (eg, investigators, REC / IRBs, trial participants, trial                      |       |
| 32 |                          | registries, journals, regulators)                                                      |       |
| 33 |                          |                                                                                        |       |
| 34 |                          |                                                                                        |       |
| 35 |                          |                                                                                        |       |
| 36 | Consent or assent        | <a href="#">#26a</a> Who will obtain informed consent or assent from potential trial   | 7     |
| 37 |                          | participants or authorised surrogates, and how (see Item 32)                           |       |
| 38 |                          |                                                                                        |       |
| 39 |                          |                                                                                        |       |
| 40 | Consent or assent:       | <a href="#">#26b</a> Additional consent provisions for collection and use of           | NA    |
| 41 | ancillary studies        | participant data and biological specimens in ancillary studies, if                     |       |
| 42 |                          | applicable                                                                             |       |
| 43 |                          |                                                                                        |       |
| 44 |                          |                                                                                        |       |
| 45 | Confidentiality          | <a href="#">#27</a> How personal information about potential and enrolled              | 10;12 |
| 46 |                          | participants will be collected, shared, and maintained in order to                     |       |
| 47 |                          | protect confidentiality before, during, and after the trial                            |       |
| 48 |                          |                                                                                        |       |
| 49 |                          |                                                                                        |       |
| 50 | Declaration of interests | <a href="#">#28</a> Financial and other competing interests for principal              | 19    |
| 51 |                          | investigators for the overall trial and each study site                                |       |
| 52 |                          |                                                                                        |       |
| 53 |                          |                                                                                        |       |
| 54 | Data access              | <a href="#">#29</a> Statement of who will have access to the final trial dataset, and  | 19    |
| 55 |                          | disclosure of contractual agreements that limit such access for                        |       |
| 56 |                          | investigators                                                                          |       |
| 57 |                          |                                                                                        |       |
| 58 |                          |                                                                                        |       |
| 59 |                          |                                                                                        |       |
| 60 |                          |                                                                                        |       |



|    |                          |                      |                                                                      |             |
|----|--------------------------|----------------------|----------------------------------------------------------------------|-------------|
| 1  | Ancillary and post trial | <a href="#">#30</a>  | Provisions, if any, for ancillary and post-trial care, and for       | 16          |
| 2  | care                     |                      | compensation to those who suffer harm from trial participation       |             |
| 3  |                          |                      |                                                                      |             |
| 4  |                          |                      |                                                                      |             |
| 5  | Dissemination policy:    | <a href="#">#31a</a> | Plans for investigators and sponsor to communicate trial results     | 20          |
| 6  | trial results            |                      | to participants, healthcare professionals, the public, and other     |             |
| 7  |                          |                      | relevant groups (eg, via publication, reporting in results           |             |
| 8  |                          |                      | databases, or other data sharing arrangements), including any        |             |
| 9  |                          |                      | publication restrictions                                             |             |
| 10 |                          |                      |                                                                      |             |
| 11 |                          |                      |                                                                      |             |
| 12 |                          |                      |                                                                      |             |
| 13 | Dissemination policy:    | <a href="#">#31b</a> | Authorship eligibility guidelines and any intended use of            | 19;20       |
| 14 | authorship               |                      | professional writers                                                 |             |
| 15 |                          |                      |                                                                      |             |
| 16 |                          |                      |                                                                      |             |
| 17 | Dissemination policy:    | <a href="#">#31c</a> | Plans, if any, for granting public access to the full protocol,      | 20          |
| 18 | reproducible research    |                      | participant-level dataset, and statistical code                      |             |
| 19 |                          |                      |                                                                      |             |
| 20 |                          |                      |                                                                      |             |
| 21 | <b>Appendices</b>        |                      |                                                                      |             |
| 22 |                          |                      |                                                                      |             |
| 23 | Informed consent         | <a href="#">#32</a>  | Model consent form and other related documentation given to          | 25;26;27;28 |
| 24 | materials                |                      | participants and authorised surrogates                               |             |
| 25 |                          |                      |                                                                      |             |
| 26 |                          |                      |                                                                      |             |
| 27 | Biological specimens     | <a href="#">#33</a>  | Plans for collection, laboratory evaluation, and storage of          | NA          |
| 28 |                          |                      | biological specimens for genetic or molecular analysis in the        |             |
| 29 |                          |                      | current trial and for future use in ancillary studies, if applicable |             |
| 30 |                          |                      |                                                                      |             |
| 31 |                          |                      |                                                                      |             |

#### Notes:

- 34 • 18a: 10;11;12;13
- 35 • 18b: 10;11;12;13
- 36 • 32: 25;26;27;28 The SPIRIT checklist is distributed under the terms of the Creative Commons Attribution
- 37 License CC-BY-ND 3.0. This checklist was completed on 24. July 2020 using
- 38 <https://www.goodreports.org/>, a tool made by the [EQUATOR Network](#) in collaboration with [Penelope.ai](#)
- 39
- 40
- 41
- 42
- 43
- 44
- 45
- 46
- 47
- 48
- 49
- 50
- 51
- 52
- 53
- 54
- 55
- 56
- 57
- 58
- 59
