# Supplementary material for: Clinical outcomes and cost–utility of rotator cuff repair surgery by open and arthroscopic techniques: study protocol for a randomised clinical trial
Source: PubMed Central journal article supplement — BMJ Open. 2020 Dec 28;10(12):e043126. doi: 10.1136/bmjopen-2020-043126 (PMC7772301; doi:10.1136/bmjopen-2020-043126), 2020-12-28
Supplement: bmjopen-2020-043126supp001.pdf [file bmjopen-2020-043126supp001.pdf]

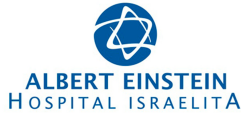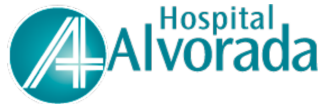

## TERMO DE CONSENTIMENTO LIVRE E ESCLARECIDO

### **Título do projeto: Custo-Efetividade da Cirurgia de Reparo do Manguito Rotador Pelas Técnicas Aberta e Artroscópica. Ensaio Clínico Randomizado.**

Prezado,

Você foi convidado a participar da pesquisa intitulada “Custo-Efetividade da Cirurgia de Reparo do Manguito Rotador Pelas Técnicas Aberta e Artroscópica. Ensaio Clínico Randomizado”. Essas informações serão fornecidas por meio de sua participação voluntária neste estudo, com o objetivo de avaliar o custo-efetividade (benefícios e malefícios e os custos dos procedimentos) das intervenções: reparo aberto do manguito rotador e reparo artroscópico do manguito rotador.

A ruptura do manguito rotador, ou seja, o rompimento dos tendões do ombro é a principal de causa de dor no ombro na população adulta, causando, além da dor, diminuição da força no ombro acometido e diminuição na qualidade de vida do paciente, devido a dor constante e piora na qualidade do sono, causado pela dor. Existem duas técnicas cirúrgicas para correção desta doença: a técnica aberta, realizada por uma incisão (corte) no ombro e visualização direta do tendão rompido; e a técnica artroscópica, realizada através de pequenos corte no ombro, por onde são introduzidos câmera de vídeo, para visualização do tendão rompido através de monitor, e instrumentais para realização da cirurgia. A motivação da realização deste estudo se deve ao fato de encontrarmos na literatura atual dúvidas sobre qual método de reparo do manguito rotador apresenta a melhora relação custo-efetividade. Acreditamos que o reparo aberto do manguito rotador apresente os mesmos resultados funcionais e de qualidade de vida que o reparo artroscópico do manguito rotador, além de apresentar um custo menor.

#### *Procedimentos a serem utilizados:*

O número de participantes estimado é de 100 indivíduos, divididos em dois grupos, 50 para o grupo de reparo aberto do manguito rotador e 50 para o grupo de reparo artroscópico do manguito rotador. A seleção será feita de forma randomizada, isto é, não saberemos onde cada indivíduo será incluído.

Os dois grupos de pacientes receberão os mesmos cuidados e os mesmos seguimentos. As avaliações serão realizadas por meio de exames clínicos e funcionais (realizados por um médico) no pré-operatório, 6, 24 e 48 semanas após o procedimento cirúrgico, exame de ressonância magnética no pré-operatório e 48 semanas após o procedimento. O programa de reabilitação após as intervenções de tratamento será idêntico em cada um dos grupos comparados. Todos os pacientes utilizarão tipóia do tipo Velpeau por seis semanas; depois de duas semanas da intervenção, você iniciará um programa de exercícios pendulares orientados pelo médico e após a sexta semana, a tipóia será retirada e você será orientado a realizar exercícios domésticos para ganho de arco de movimento (ADM), além de duas sessões semanais de fisioterapia para analgesia e recuperação da amplitude de movimento do ombro. Os exercícios de fortalecimento serão permitidos a partir da décima segunda semana, sob orientação de fisioterapeuta.

No término do estudo será verificado se houve melhora nas avaliações funcionais, de qualidade de vida e cicatrização do tendão reparado por meio de questionários de simples preenchimento e exame de ressonância magnética.

Você não terá benefício além do esperado para a operação de correção da lesão, esperando-se melhora da dor e função do ombro acometido. Os riscos do presente estudo são aqueles inerentes a qualquer tratamento cirúrgico e procedimento anestésico, como infecção da ferida operatória, formação de cicatriz, dor, limitação do arco de movimento do ombro, rerruptura do manguito rotador, lesão neurovascular. Ambas as técnicas cirúrgicas tem o mesmo objetivo, ou seja, reparar o tendão rompido ao osso. A técnica aberta necessita de uma incisão maior, além de maior dissecação cirúrgica e manipulação do músculo deltoide, o que pode provocar maior dor pós-operatória e fraqueza desse músculo, além de causar uma cicatriz pouco maior. Entretanto, ela provê uma grande visualização e capacidade de manipulação e mobilização do tendão rompido, o que proporciona um reparo mais

Número: \_\_\_\_\_

Iniciais: \_\_\_\_\_

1

Rubrica: 1) Paciente/Representante Legal/Testemunha Imparcial \_\_\_\_\_ 2) Responsável pelo consentimento \_\_\_\_\_

Versão 2\_datada de 25 de setembro de 2019

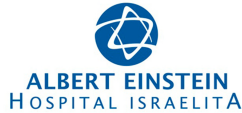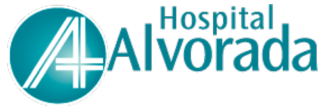

seguro e livre de tensão. Já a técnica artroscópica é realizada com alguns cortes puntiformes no ombro, geralmente três ou quatro; pelas incisões (cortes) menores, ela necessita de menos manipulação muscular, o que teoricamente causaria menos dor pós-operatória e menos fraqueza muscular do músculo deltoide; além disso, apresenta cicatrizes menores. No entanto, é uma técnica que demanda mais experiência do cirurgião e a mobilização do(s) tendão(ões) rompido(s) é limitada; a utilização de grande quantidade de soro fisiológico pode causar edema no ombro operado, o que geralmente é revertido após as primeiras 12 horas da cirurgia.

Trata-se de um estudo que testará a hipótese de que a cirurgia de reparo aberto do manguito rotador apresenta uma melhor relação custo-efetividade que a cirurgia de reparo artroscópico do manguito rotador. Somente no final do estudo poderemos determinar a presença de alguma diferença entre estes dois tipos de tratamento.

Em qualquer etapa do estudo, você terá acesso aos profissionais responsáveis pela pesquisa para esclarecimento de eventuais dúvidas. O coordenador do projeto é o Dr. Mário Lenza e o principal responsável pelo estudo é o Dr. Rafael Pierami, que podem ser encontrados: Dr. Mario Lenza – endereço Av. Albert Einstein, 627 – bloco A1 – 3º andar – Programa Locomotor, Morumbi, São Paulo – CEP 05652-900: Tel: (11) 2151.1444; e-mail: [mario.lenza@einstein.br](mailto:mario.lenza@einstein.br); e Dr. Rafael Pierami – endereço Avenida Ministro Gabriel Rezende de Passos, 550, 2º andar, Hospital Alvorada Moema – Centro de Excelência em Cirurgia de Ombro e Cotovelo, Moema, São Paulo – CEP 04521-022 – Tel: (11) 2186-9810 ou (11) 2186-9809; e-mail: [rafael\\_pierami@hotmail.com](mailto:rafael_pierami@hotmail.com).

Se você tiver qualquer dúvida ética em relação à pesquisa, entre em contato com o **Comitê de Ética em Pesquisa do Hospital Israelita Albert Einstein** - Av. Albert Einstein 627/701, fone 2151-3729, e-mail: [cep@einstein.br](mailto:cep@einstein.br) ou o **Comitê de Pesquisa do Hospital Alvorada**- Av. Ministro Gabriel de Rezende Passos, 550, 2º andar, telefones 2186-9810 ou 2186-9809, e-mail: [rafael\\_pierami@hotmail.com](mailto:rafael_pierami@hotmail.com) ou ainda o Comitê de Ética em Pesquisa em Seres Humanos do Hospital Pró-Cardíaco (CEP/HPC), Tel: (21) 3289-3802, Localizado na Rua Voluntários da Pátria, 435/8º andar, Botafogo, Rio de Janeiro, CEP: 22270-005 - Horário de atendimento: de segunda à sexta-feira, das 09:00h às 16:00h.

Reclamações, elogios e sugestões deverão ser encaminhados ao Sistema de Atendimento ao Cliente (SAC) por meio do telefone (11) 2151-0222 ou formulário identificado como fale conosco disponível na página da pesquisa clínica ou pessoalmente.

Você pode retirar o seu consentimento a qualquer momento e deixar de participar do estudo, sem qualquer prejuízo à continuidade de seu tratamento na Instituição.

Suas informações serão analisadas em conjunto com as informações de outros pacientes voluntários e não será divulgada a identificação de nenhum paciente. Você tem o direito de ser mantido atualizado sobre os resultados parciais das pesquisas e de quaisquer resultados que sejam do conhecimento dos pesquisadores. Não haverá nenhuma despesa pessoal para você em qualquer fase do estudo, incluindo exames e consultas, assim como também não há compensação financeira relacionada à sua participação.

Se você sofrer algum dano, previsto ou não neste termo de consentimento e relacionado com sua participação no estudo, a equipe que realizou o procedimento custeará as despesas médicas necessárias e decorrentes do estudo.

O pesquisador se compromete a utilizar os dados e materiais coletado durante o estudo somente para esta pesquisa, como descrito previamente.

Eu discuti com o Dr. Mário Lenza e/ou Dr. Rafael Pierami e/ou qualquer membro autorizado da equipe desta pesquisa, sobre a minha decisão em participar nesse estudo. Ficaram claros para mim quais são os propósitos do estudo, os procedimentos a serem realizados, seus eventuais desconfortos e riscos, as garantias de confidencialidade e de esclarecimentos permanentes. Ficou claro também que minha participação é isenta de despesas e que tenho garantia do acesso a tratamento hospitalar quando necessário. Concordo voluntariamente em participar deste estudo e poderei retirar o meu consentimento a qualquer momento, antes ou durante o mesmo, sem penalidades ou prejuízo ou perda de qualquer benefício que eu possa ter adquirido, ou no meu atendimento neste Serviço.

Número: \_\_\_\_\_

Iniciais: \_\_\_\_\_

2

Rubrica: 1) Paciente/Representante Legal/Testemunha Imparcial \_\_\_\_\_ 2) Responsável pelo consentimento \_\_\_\_\_

Versão 2\_datada de 25 de setembro de 2019

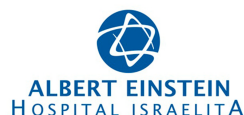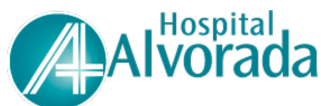

\_\_\_\_\_  
**Nome Completo do participante da pesquisa**

\_\_\_\_\_  
Assinatura do participante da pesquisa

Data: \_\_\_/\_\_\_/\_\_\_

\_\_\_\_\_  
**Nome completo e legível do pesquisador responsável**

\_\_\_\_\_  
Assinatura do pesquisador responsável

Data: \_\_\_/\_\_\_/\_\_\_

\_\_\_\_\_  
**Nome completo do representante legal**

\_\_\_\_\_  
Assinatura do representante legal

Data: \_\_\_/\_\_\_/\_\_\_

\_\_\_\_\_  
**Relação do representante legal com o paciente**

\_\_\_\_\_  
**Nome completo da testemunha imparcial**

**\*\*para casos de voluntários menores de 18 anos, analfabetos, semi-analfabetos ou portadores de deficiência auditiva ou visual.**

\_\_\_\_\_  
Assinatura da testemunha imparcial

Data: \_\_\_/\_\_\_/\_\_\_

Número: \_\_\_\_\_

Iniciais: \_\_\_\_\_

3

Rubrica: 1) Paciente/Representante Legal/Testemunha Imparcial \_\_\_\_\_ 2) Responsável pelo consentimento \_\_\_\_\_

Versão 2\_data de 25 de setembro de 2019
